# Supplementary material for: UDAY: A comprehensive diabetes and hypertension prevention and management program in India
Source: PubMed Central journal article supplement — BMJ Open. 2018 Jul 10;8(6):e015919. doi: 10.1136/bmjopen-2017-015919 (PMC6082491; doi:10.1136/bmjopen-2017-015919), 2018-07-10
Supplement: bmjopen-2017-015919.draft_revisions.pdf [file bmjopen-2017-015919.draft_revisions.pdf]

# BMJ Open

BMJ Open is committed to open peer review. As part of this commitment we make the peer review history of every article we publish publicly available.

When an article is published we post the peer reviewers' comments and the authors' responses online. We also post the versions of the paper that were used during peer review. These are the versions that the peer review comments apply to.

The versions of the paper that follow are the versions that were submitted during the peer review process. They are not the versions of record or the final published versions. They should not be cited or distributed as the published version of this manuscript.

BMJ Open is an open access journal and the full, final, typeset and author-corrected version of record of the manuscript is available on our site with no access controls, subscription charges or pay-per-view fees (<http://bmjopen.bmj.com>).

If you have any questions on BMJ Open's open peer review process please email [editorial.bmjopen@bmj.com](mailto:editorial.bmjopen@bmj.com)

# BMJ Open

## UDAY: Protocol of a Comprehensive Diabetes and Hypertension Prevention and Management Program in India

|                                 |                                                                                                                                                                                                                                                                                                                                                                                                                                                                                                                                                                                                                                                    |
|---------------------------------|----------------------------------------------------------------------------------------------------------------------------------------------------------------------------------------------------------------------------------------------------------------------------------------------------------------------------------------------------------------------------------------------------------------------------------------------------------------------------------------------------------------------------------------------------------------------------------------------------------------------------------------------------|
| Journal:                        | <i>BMJ Open</i>                                                                                                                                                                                                                                                                                                                                                                                                                                                                                                                                                                                                                                    |
| Manuscript ID                   | bmjopen-2017-015919                                                                                                                                                                                                                                                                                                                                                                                                                                                                                                                                                                                                                                |
| Article Type:                   | Protocol                                                                                                                                                                                                                                                                                                                                                                                                                                                                                                                                                                                                                                           |
| Date Submitted by the Author:   | 12-Jan-2017                                                                                                                                                                                                                                                                                                                                                                                                                                                                                                                                                                                                                                        |
| Complete List of Authors:       | Mohan, Sailesh; Public Health Foundation of India<br>Jarhyan, Prashant; Public Health Foundation of India<br>Ghosh, Shreeparna; Public Health Foundation of India<br>Srinivasapura Venkateshmurthy, Nikhil; Public Health Foundation of India<br>Gupta, Ruby; Public Health Foundation of India<br>Rana, Ritu; Population Services International India<br>Malhotra, Cheena; Project Hope India<br>Rao, Bhaskara; MaxCure Hospital<br>Kalra, Sanjay; Bharti Hospital Karnal<br>Tandon, Nikhil; All India Institute of Medical Sciences,<br>Reddy, KS; Public Health Foundation of India<br>Prabhakaran, Dorairaj; Public Health Foundation of India |
| <b>Primary Subject Heading</b>: | Epidemiology                                                                                                                                                                                                                                                                                                                                                                                                                                                                                                                                                                                                                                       |
| Secondary Subject Heading:      | Diabetes and endocrinology, Health services research, Public health, Cardiovascular medicine                                                                                                                                                                                                                                                                                                                                                                                                                                                                                                                                                       |
| Keywords:                       | Hypertension < CARDIOLOGY, General diabetes < DIABETES & ENDOCRINOLOGY, EPIDEMIOLOGY                                                                                                                                                                                                                                                                                                                                                                                                                                                                                                                                                               |
|                                 |                                                                                                                                                                                                                                                                                                                                                                                                                                                                                                                                                                                                                                                    |

SCHOLARONE™  
Manuscripts

1  
2 **UDAY: Protocol of a Comprehensive Diabetes and Hypertension Prevention and**  
3  
4 **Management Program in India**  
5  
6  
7

8  
9 Authors: Sailesh Mohan,<sup>1</sup> Prashant Jarhyan,<sup>1</sup> Shreeparna Ghosh,<sup>1</sup> Nikhil Srinivasapura  
10  
11 Venkateshmurthy,<sup>1</sup> Ruby Gupta,<sup>1</sup> Ritu Rana,<sup>2</sup> Cheena Malhotra,<sup>3</sup> Bhaskara Rao,<sup>4</sup> Sanjay  
12  
13 Kalra,<sup>5</sup> Nikhil Tandon,<sup>6</sup> K. Srinath Reddy,<sup>1</sup> Dorairaj Prabhakaran<sup>1</sup>  
14  
15  
16  
17

18  
19 <sup>1</sup> Public Health Foundation of India, Gurgaon, India  
20

21 <sup>2</sup> Population Services International, Delhi, India  
22

23 <sup>3</sup> Project HOPE, Delhi, India  
24

25 <sup>4</sup> Manipal Hospitals, Visakhapatnam, India  
26  
27

28 <sup>5</sup> Bharti Hospital, Karnal, India  
29

30 <sup>6</sup> All India Institute of Medical Sciences, Delhi, India  
31  
32  
33  
34  
35  
36  
37  
38  
39  
40  
41  
42  
43  
44  
45  
46  
47  
48

49 Corresponding author  
50 Dr. Sailesh Mohan  
51 Senior Research Scientist and Associate Professor  
52 Public Health Foundation of India  
53 Email:smohan@phfi.org  
54  
55  
56  
57  
58  
59  
60

## Abstract

### Introduction

Diabetes and hypertension are two leading noncommunicable conditions, which are sub-optimally managed in India. Thus, innovative comprehensive approaches that can concomitantly improve their detection, prevention and control are warranted.

### Methods and analysis

UDAY, a 5-year initiative aims to reduce the risk of diabetes and hypertension and improve management by implementing a comprehensive intervention program in the two selected study sites, Sonipat and Visakhapatnam (Vizag). It has a pre-post evaluation design with representative cross-sectional surveys before and after intervention. Within these two sites, urban and rural sub-sites each with a total population of approximately 1, 00,000 people each were selected and a baseline and post intervention assessment will be conducted deploying 5 surveys (among general population, patients, healthcare providers including physicians and pharmacists, health facilities) which will determine: the knowledge levels about diabetes and hypertension, the proportion treated and controlled; the patient knowledge and self-management skills; healthcare providers' management practices; the level of access and barriers to obtaining care.

The interventions will include: tailored health promotion for improving public knowledge; screening of adults aged  $\geq 30$  years for identifying those at high risk of diabetes and/or hypertension for linkage to the healthcare system; patient education using technology enabled community health workers, geographic information system (GIS) based mapping of the communities, healthcare provider training on management guidelines, community based diabetes registry and; advocacy to improve access to healthcare. The baseline surveys have been completed, the study areas mapped using GIS and the interventions are being implemented. UDAY is expected to increase over baseline the levels of: public knowledge about diabetes and hypertension; those treated and controlled; patient self-management skills; the use of guideline based management by providers and; access to healthcare, leading to improved health outcomes and inform development of a India relevant chronic care model.

### Ethics and dissemination

Ethical clearance for conduct of the study was obtained from the Institutional Ethics Committee (IEC) of the Public Health Foundation of India. The findings will be targeted primarily at public health policymakers and advocates, but will be disseminated widely through other mechanisms including conference presentations and peer-reviewed publications, as well as to the participating communities.

### Strengths and limitations of this study

- Unique large community based study in geographically and culturally diverse “real world” settings in India for improving prevention and control of diabetes and hypertension.
- Employs a comprehensive multi-level, multi component intervention approach to target the general population, patients, providers and to strengthen the health system for improving prevention and control of diabetes and hypertension.

- Concomitantly addresses detection, prevention and management of both diabetes and hypertension.
- Extensively leverages mobile technology to enable health workers in task sharing as well as for electronic data capture.
- Quasi experimental design with complex intervention may hinder attribution of specific effect to individual intervention components.

## Introduction

Non-communicable Diseases (NCDs) are currently the leading cause of preventable death and disability in India, accounting for two out of every three deaths [1]. Among NCDs, the prevalence of type-2 diabetes mellitus (DM) and hypertension have been rising rapidly. Currently there are about 69 million people with diabetes, a figure that is projected to further increase to a staggering 124 million by 2040 [2]. The number of individuals with hypertension is projected to increase to 214 million by 2030 from 118 million in 2000 [3,4]. Furthermore, diabetes and hypertension are important risk factors for both the major forms of cardiovascular disease [CVD (coronary heart disease and stroke)], highly prevalent and attributable to nearly half of all the deaths from NCDs [4].

Despite the availability of proven and effective treatments, diabetes as well as hypertension detection and control rates are abysmally low in India with blood pressure control among those with diabetes being even more sub-optimal, with a huge gap between detection and adequate treatment [1,3,4]. Thus, there is great potential and opportunity to reduce the rising burden of diabetes and hypertension as well as the associated vascular risk in India through concomitantly improving their detection, prevention and control.

To address this huge gap in the prevention and management of both these conditions we are undertaking a 5-year initiative entitled “UDAY” (meaning dawn in *Sanskrit*) in epidemiologically

1  
2 transitioning communities, that aims to reduce the risk of diabetes and hypertension and  
3  
4 concomitantly improve the management of either conditions by implementing a comprehensive  
5  
6 community based innovative intervention program in the two geographically and culturally  
7  
8 distinct study sites, Sonipat (Haryana, North India) and Visakhapatnam or Vizag (Andhra  
9  
10 Pradesh, South India). This paper describes the design and methods of UDAY- A  
11  
12 Comprehensive Diabetes and Hypertension Prevention and Management Program In India.  
13  
14  
15  
16  
17  
18

## 19 **Methods**

### 20 Study design

21  
22 UDAY has a pre-post evaluation design with representative cross sectional surveys before (in  
23  
24 year one at baseline, pre-intervention) and after the intervention (in year 5). The main research  
25  
26 question is: whether a multi-component, multi-level, cost-effective, comprehensive intervention  
27  
28 program will improve the prevention, detection and optimal management of diabetes and  
29  
30 hypertension in the two selected study sites. Ethical clearance for conduct of the study was  
31  
32 obtained from the Institutional Ethics Committee (IEC) of the Public Health Foundation of India.  
33  
34  
35  
36  
37  
38

39  
40 At baseline, in year one, 5 surveys were conducted among the general population, among  
41  
42 patients, among healthcare providers including physicians and pharmacists and in health  
43  
44 facilities to guide intervention development and impact assessment. Similar assessment is  
45  
46 planned after the intervention, in year 5.  
47  
48  
49

50  
51 The specific objectives these assessments are to:  
52  
53  
54  
55  
56  
57  
58  
59  
60

- 1  
2  
3  
4  
5  
6  
7  
8  
9  
10  
11  
12  
13  
14  
15  
16  
17  
18  
19  
20  
21  
22  
23  
24  
25  
26  
27  
28  
29  
30  
31  
32  
33  
34  
35  
36  
37  
38  
39  
40  
41  
42  
43  
44  
45  
46  
47  
48  
49  
50  
51  
52  
53  
54  
55  
56  
57  
58  
59  
60
1. Determine the prevalence, awareness, the knowledge levels about diabetes and hypertension, the proportion treated and controlled among a representative sample (n=12000) of adults aged  $\geq 30$  years in the selected study areas. (Population survey)
2. Determine the patient knowledge levels and self-management skills among a convenience sample (n=400) of those diagnosed with diabetes and hypertension in the selected study areas. (Patient survey)
3. a) Determine healthcare providers' (physicians) knowledge and practices related to diabetes and hypertension management among a convenience sample (n=50) of healthcare providers' in the selected study areas.  
b) Determine pharmacists' knowledge related to diabetes and hypertension and dispensing practices among a convenience sample of pharmacists (n=350) (Provider survey)
4. Determine the level of access and potential barriers to diabetes and hypertension care provided by the public healthcare system in the selected study areas (n=50). (Facility survey)
5. Determine the cost-effectiveness of the intervention program in improving diabetes and hypertension treatment and management outcomes in the study areas. (Using population survey, GIS data and project implementation data)

### Study sites

We are undertaking this comprehensive diabetes prevention and management program in two epidemiologically transitioning areas located in Sonipat in Haryana and Vizag in Andhra Pradesh (Figure 1).

Figure 1: Study sites

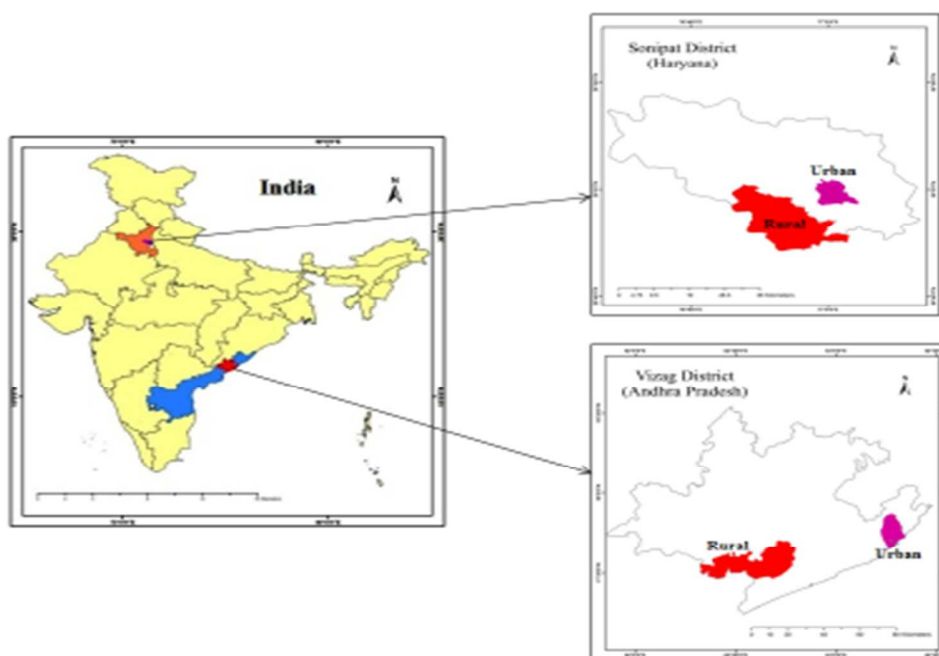

We defined the areas and their sub-areas using the following terminology:

- Sites – a bounded geographic area within which we have defined distinct rural and urban sub-sites for the study. Each site has been defined such that it contains approximately 2,00,000 people. Sonipat and Vizag are each a site.
- Sub-sites – within each site, we have defined one rural and one urban sub-site for study. Each sub-site is geographically bounded, and contains a population of



1  
2 approximately 1,00,000. Within Sonipat and Vizag, we have defined two sub-sites each  
3  
4 (rural and urban).  
5

- 6  
7 • Total project – the total project is the summation of the two sites, including the four sub-  
8  
9 sites (two sub-sites within each site). Therefore the total population under the study is  
10  
11 approximately 4,00,000.  
12

### 13 Sample for the population survey

14  
15 We based our sample size calculation on the prevalence of diabetes, which has a lower  
16  
17 prevalence than hypertension, in previously reported studies in India. Anticipating a response  
18  
19 rate of 85 % with a design effect factor of 1.5 (to account for cluster sampling, and a  
20  
21 confidence level of 1.96, the sample size estimates were generated for males and females in  
22  
23 three age strata (30-49, 50-69, 69 and above) in each setting (urban, rural). About 2968  
24  
25 subjects was estimated to be required per urban sub-site (Sonipat and Vizag) and 2942  
26  
27 subjects per rural sub-site (Sonipat and Vizag). The total estimated sample was 11820, which  
28  
29 was increased to 12000 to obtain equal samples in both urban and rural areas. Sample  
30  
31 weights were generated for estimating the prevalence of diabetes, hypertension and related  
32  
33 cardiometabolic risk factors at the district level.  
34  
35  
36  
37  
38  
39  
40  
41

### 42 Survey sampling and participant selection

#### 43 Population survey

44  
45  
46  
47 Two representative population based cross sectional surveys with independent samples and  
48  
49 identical methodologies at baseline and at the end of intervention will be conducted, that will  
50  
51 provide estimates of the burden and changes in the prevalence of diabetes, hypertension, and  
52  
53 related cardiometabolic risk factors. In addition, those recruited for the first survey at baseline  
54  
55  
56  
57  
58  
59  
60

1  
2 (which has been completed), will be followed up as a cohort to estimate the incidence of new  
3  
4 cardio-metabolic (CMD) risk factors, disease, healthcare utilization, diabetes and hypertension  
5  
6 related morbidity and mortality.  
7  
8

9  
10  
11 The first population survey (baseline survey) was done among a representative sample of  
12  
13 adults aged  $\geq 30$  years residing in the selected study areas of Sonipat and Vizag. Inclusion  
14  
15 criteria – a) adults aged  $\geq 30$  years residing in the sampled urban and rural areas of Sonipat  
16  
17 and Vizag respectively. b) willing to participate and provide informed consent.  
18  
19

20  
21 We excluded individuals who were unwilling to provide informed consent and those with  
22  
23 serious chronic illnesses [such as that of the liver (cirrhosis), kidneys (renal failure) or  
24  
25 malignancies], pregnant women.  
26  
27

28  
29  
30 For the baseline survey, a multistage random sampling technique was deployed to obtain a  
31  
32 representative sample of adults aged  $\geq 30$  years, using data from the most recent census of  
33  
34 2011. In addition, a manual enumeration and mapping of all households and structures was  
35  
36 conducted in all the study areas [all census enumeration blocks (CEBs) in urban areas and  
37  
38 villages in rural], to identify households and structures constructed since the last census (Table  
39  
40 1). CEBs are considered as the primary sampling unit in urban areas and villages in the rural  
41  
42 areas respectively. On average, about 100-125 households with a population of 650-700  
43  
44 persons would generally constitute a CEB. This enabled a complete sampling frame for the  
45  
46 selection of households for the survey and thus provided an equal chance of selection to each  
47  
48 household. Besides, it also helped identify potential recipients of the intervention program (i.e.,  
49  
50 adults aged  $\geq 30$  years) in the study sites.  
51  
52  
53  
54  
55  
56  
57  
58  
59  
60

In each sub-site, 85 clusters were randomly selected (urban Sonipat: 85/200 CEBs, urban Vizag: 85/207 CEBs and rural Sonipat: 85/168 clusters, rural Vizag: 85/147 clusters) according to probability proportional to size (Figure 2). In rural sub-sites, bigger villages were divided into clusters with 75 to 300 households. From each cluster in the urban and rural sub-sites, 18 to 25 households were randomly selected and 1 eligible male and female were selected randomly within each household using Kish table. In Sonipat district, 3675 households participated in baseline survey (rural: 1881, urban: 1794) with total being 6208 participants (rural: 3104, urban: 3104). In Vizag district, 3589 households (rural: 1817, urban: 1772) participated in the baseline survey with total being 6035 participants (rural: 3069, urban: 2966). Thus, we had 12000 individuals from both urban and rural areas of North and South India.

Table 1: Manual enumeration of study areas

| Study site             | Structures | Households | Population<br>≥30 years | Total<br>population<br>(census<br>2011) |
|------------------------|------------|------------|-------------------------|-----------------------------------------|
| Sonipat urban sub-site | 24408      | 20406      | 41981                   | 102292                                  |
| Sonipat rural sub-site | 28813      | 17283      | 40850                   | 100935                                  |
| Vizag urban sub-site   | 16888      | 39504      | 70735                   | 153721                                  |
| Vizag rural sub-site   | 33799      | 30817      | 59540                   | 121209                                  |

Figure 2: Sample selection for the baseline survey

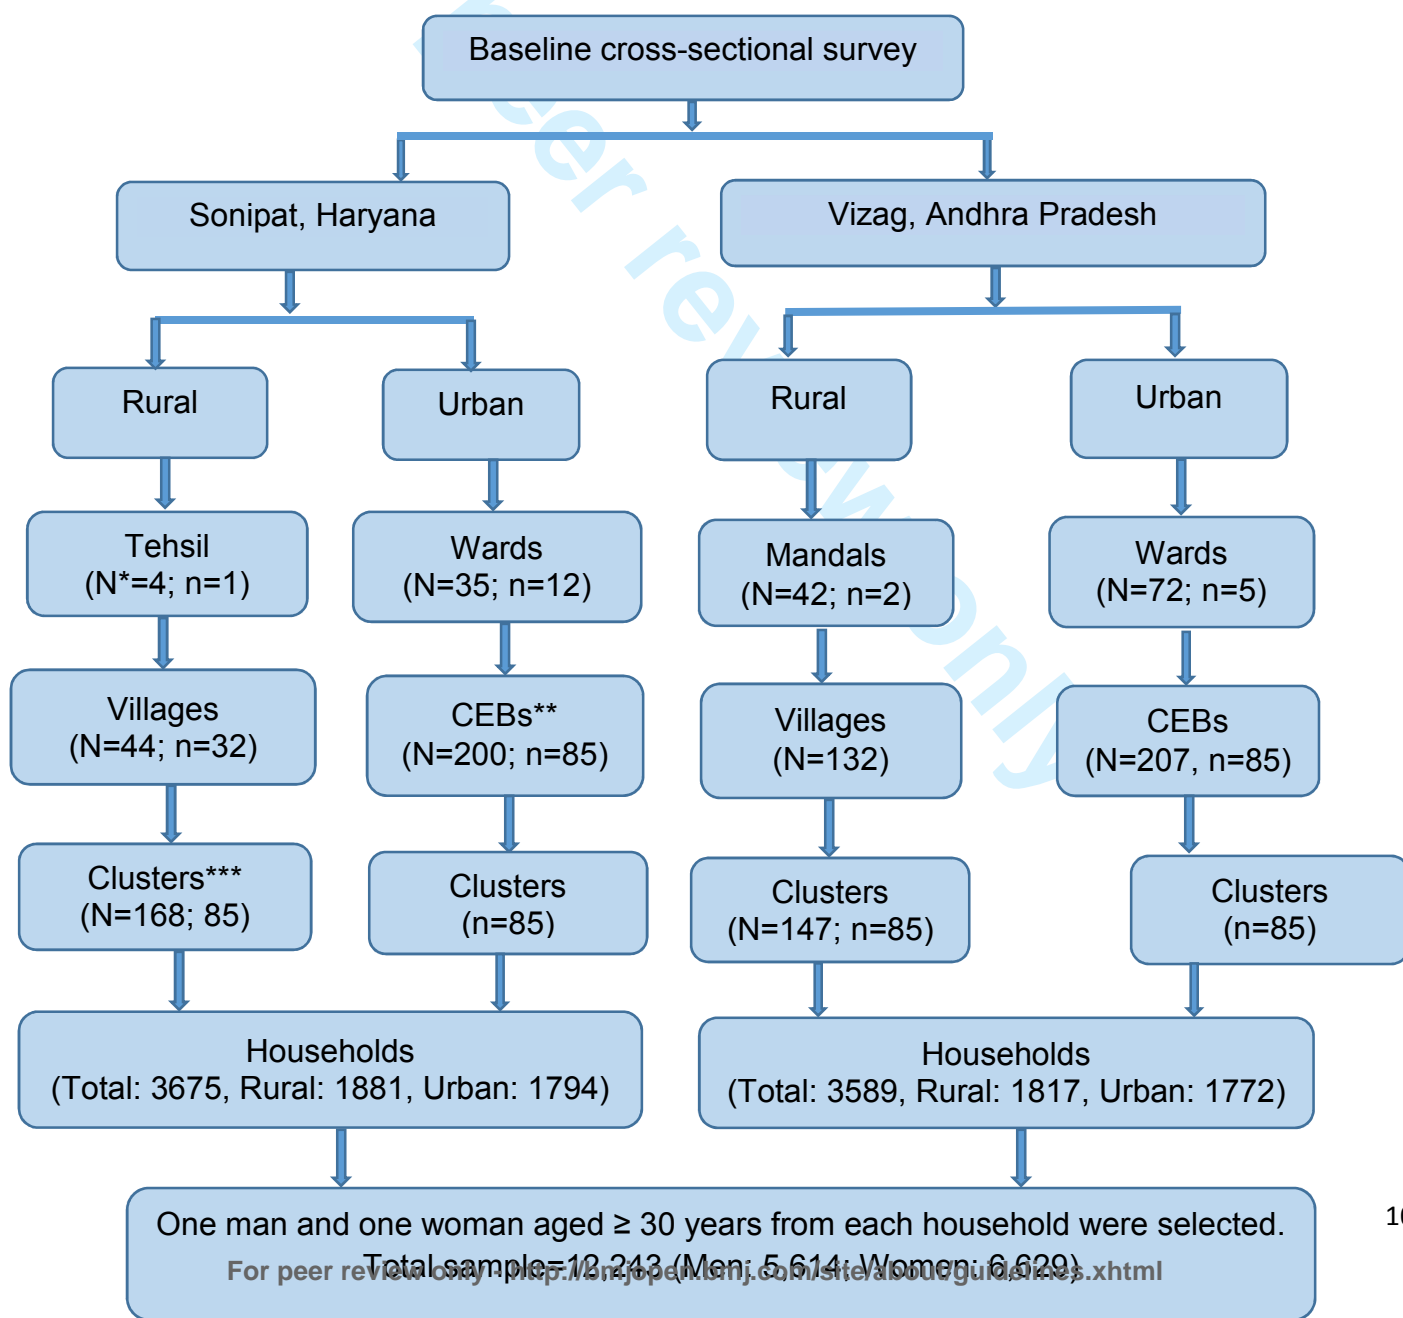

1  
2  
3  
4  
5  
6  
7  
8 \*N=total, n=number selected

9  
10 \*\*CEB=Census Enumeration Block

11 \*\*\*Cluster = In urban sub-site clusters comprise CEBs, in rural sub-site bigger villages were split into 2 or 3  
12 clusters with sizes of 75-300 households.  
13

### 14 15 16 Data collection for the population survey

17  
18 For the baseline survey, trained health workers visited the selected participants at their homes.

19  
20 Written informed consent was sought and obtained from the selected individuals prior to data  
21 collection and a unique identification number was assigned. For each participant, data  
22 collection comprised an interviewer administered questionnaire, a brief physical examination  
23 (height, weight, waist circumference, hip circumference, blood pressure, body fat percentage),  
24 blood and urine collection as detailed below.  
25  
26  
27  
28  
29  
30  
31  
32  
33  
34

35 Information on demographics, socio-economic characteristics, behavioral risk factors (tobacco  
36 use, alcohol use, diet and physical inactivity), family history of various NCDs, female  
37 reproductive history, general awareness about diabetes and hypertension, risk factors,  
38 prevention, symptoms and diagnosis, complications, treatment and management, medical  
39 history of NCDs [diabetes, hypertension, coronary artery disease (CAD), myocardial infraction  
40 (MI), stroke, heart failure, chronic kidney disease (CKD), peripheral vascular disease (PVD),  
41 chronic obstructive pulmonary disease (COPD), asthma], quality of life, mental health, social  
42 support, cost of healthcare and healthcare utilization was collected using a tablet based  
43 application (Table 2).  
44  
45  
46  
47  
48  
49  
50  
51  
52  
53  
54  
55  
56  
57  
58  
59  
60

Body measurements such as height, weight, waist and hip circumferences, blood pressure and body fat measurement by bio impedance using TANITA were also obtained using standardized equipment.

Bio-samples (fasting blood and morning urine) were collected for the laboratory estimation of fasting plasma glucose, glycated hemoglobin (HbA1c), lipids, serum creatinine, urea, urine microalbumin and urine creatinine. We have also stored the bio samples for future analysis of emerging biomarkers and genetics.

Table 2: Summary of indicators, measures, methods and instruments for baseline survey

| Indicators                                      | Measures                                                                                                 | Methods                                                 | Instruments                                                                                                                                                                                                                                                      |
|-------------------------------------------------|----------------------------------------------------------------------------------------------------------|---------------------------------------------------------|------------------------------------------------------------------------------------------------------------------------------------------------------------------------------------------------------------------------------------------------------------------|
| Demographics and socio-economic characteristics | Age, sex, marital status, religion, education, income, occupation, contact details, and household assets | Questionnaires                                          | Centre for cArdio-metabolic Risk Reduction in South Asia(CARRS) Surveillance Study [5]<br>Establishment of Sentinel Surveillance System for CVD in Indian Industrial Populations (Sentinel Surveillance Study) [6]<br>National Family Health Survey, 2005-06 [7] |
| Behavioral risk factors                         | Tobacco use<br>Alcohol use<br><br>Physical activity<br><br>Dietary habits                                | Questionnaire<br><br>Questionnaire<br><br>Questionnaire | CARRS, Sentinel Surveillance Study<br><br>Global Physical Activity Questionnaire (GPAQ-2) [8]<br><br>CARRS,INTERHEART Study[9]                                                                                                                                   |
| Family history                                  | Prevalence of cardiometabolic diseases (CMDs) among family                                               | Questionnaire                                           | CARRS                                                                                                                                                                                                                                                            |

|                                            |                                                                                                                                              |                                                                                                                                   |                                                                                                                                                                                                                                                                      |
|--------------------------------------------|----------------------------------------------------------------------------------------------------------------------------------------------|-----------------------------------------------------------------------------------------------------------------------------------|----------------------------------------------------------------------------------------------------------------------------------------------------------------------------------------------------------------------------------------------------------------------|
|                                            | members related to participants, mortality                                                                                                   |                                                                                                                                   |                                                                                                                                                                                                                                                                      |
| Female reproductive history                | Menarche/ gestational history, menopause (surgical / physiological / whether on hormone replacement therapy) / contraception                 | Questionnaire                                                                                                                     | CARRS                                                                                                                                                                                                                                                                |
| Awareness and knowledge                    | General awareness about diabetes and hypertension, risk factors, prevention, symptoms and diagnosis, complications, treatment and management | Questionnaire                                                                                                                     | CARRS                                                                                                                                                                                                                                                                |
| Physiological and biochemical risk factors | Hypertension<br><br>Diabetes<br><br>Dyslipidemia                                                                                             | Blood pressure measurements<br><br>Laboratory estimation of fasting plasma glucose, glycated hemoglobin (HbA1c)<br><br>Laboratory | Standardized method (American Heart Association) and validated instrument (certified by British Hypertensive Society and Association for the Advancement of Medical Instrumentation)<br>Standardized across both the sites<br><br>Standardized across both the sites |

|                                                                           |                                                                                                              |                                                                                                                                                                           |                                                                                                                                                              |
|---------------------------------------------------------------------------|--------------------------------------------------------------------------------------------------------------|---------------------------------------------------------------------------------------------------------------------------------------------------------------------------|--------------------------------------------------------------------------------------------------------------------------------------------------------------|
|                                                                           |                                                                                                              | estimation of serum total cholesterol, low density lipoprotein cholesterol, very low density lipoprotein cholesterol, high density lipoprotein cholesterol, triglycerides | Standardized across both the sites                                                                                                                           |
|                                                                           | Obesity                                                                                                      | Anthropometry (height, weight, waist and hip circumferences, body fat)                                                                                                    | Standard procedures based on National Health And Nutrition Examination Survey-III with instruments used in epidemiological studies on South Asian population |
| Medical history                                                           | Chronic kidney disease<br><br>Stroke, myocardial infraction, Congestive heart failure, Chronic stable angina | Serum creatinine, urea, urine microalbumin and urine creatinine<br><br>Questionnaires including medical history                                                           | Standardized across both the sites<br><br>Rose Angina, CARRS                                                                                                 |
| Treatment history, health services, quality of care and health care costs | Awareness and risk factor control<br><br>Access to health care services, utilization of                      | Questionnaire                                                                                                                                                             | CARRS                                                                                                                                                        |



|                                |                                                                                                               |               |                                                                         |
|--------------------------------|---------------------------------------------------------------------------------------------------------------|---------------|-------------------------------------------------------------------------|
|                                | services, health insurance coverage, costs of treating CMDs and their risk factors                            |               |                                                                         |
| Prevalence                     | COPD and asthma                                                                                               | Questionnaire | NHANES III and present standards of the American Thoracic Society (ATS) |
| Health related Quality of Life | Mobility, self-care, usual activities, pain/discomfort, anxiety/depression (related to CMDs and risk factors) | Questionnaire | European Quality of Life 5 Dimensions questionnaire (EQ-5D-3L) [10]     |
| Mental health                  | Depression                                                                                                    | Questionnaire | Modified from Patient Health Questionnaire 9 (PHQ-12) [11]              |
| Social well-being              | Social support                                                                                                | Questionnaire | Developed for UDAY                                                      |

### Data collection for the patient survey

Trained research staff visited health facilities located in the aforementioned selected study areas and approached those with a diagnosis of diabetes and/or hypertension. Written informed consent was sought and obtained from the individuals prior to data collection and data collection comprised an interviewer administered questionnaire (Table 3).

The patient survey was done among a convenience sample of 400 patients having diabetes and/or hypertension attending health facilities and residing in the selected study areas of Sonipat and Vizag.

Inclusion criteria: We included patients with diabetes and or hypertension residing/attending health facilities in the sampled urban and rural areas of Sonipat and Vizag respectively and were willing to participate and provide informed consent.

Exclusion criteria: We excluded those unwilling to provide informed consent.

Table 3: Summary of indicators, measures, methods and instruments for the patient survey

| Indicators                                           | Measures                                                                                                                      | Methods        | Instruments                                                    |
|------------------------------------------------------|-------------------------------------------------------------------------------------------------------------------------------|----------------|----------------------------------------------------------------|
| Demographics and socio-economic characteristics      | Age, sex, education, income, occupation, contact details                                                                      | Questionnaires | CARRS<br>Sentinel Surveillance Study                           |
| Behavioral risk factors                              | Tobacco use<br>Alcohol use                                                                                                    | Questionnaire  | CARRS, Sentinel Surveillance Study                             |
| Awareness and knowledge of diabetes and hypertension | Awareness of risk factors, symptoms and diagnosis, cut-off levels for diagnosis, complications, treatment and management      | Questionnaire  | Developed for UDAY                                             |
| Diabetes and hypertension related medical history    | Diagnosis, health care utilization, control, self-management practices, complications, comorbidities, and treatment adherence | Questionnaire  | Developed for UDAY                                             |
| Health related Quality of Life                       | Mobility, self-care, usual activities, pain/discomfort, anxiety/depression (related to CMDs and risk factors)                 | Questionnaire  | European Quality of Life 5 Dimensions questionnaire (EQ-5D-3L) |
| Mental health                                        | Depression                                                                                                                    | Questionnaire  | Modified from Patient Health Questionnaire 9 (PHQ-12)          |
| Social well-being                                    | Social support                                                                                                                | Questionnaire  | Developed for UDAY                                             |

|                        |                                                                   |               |       |
|------------------------|-------------------------------------------------------------------|---------------|-------|
| Healthcare utilization | Hospital visits in the past 12 months and health care expenditure | Questionnaire | CARRS |
|------------------------|-------------------------------------------------------------------|---------------|-------|

### Data collection for the provider surveys

Trained research staff visited health facilities located in the aforementioned selected study areas and approached healthcare providers (physicians and pharmacists). Written informed consent was sought and obtained from the individuals prior to data collection and data collection comprised an interviewer administered questionnaire (Table 4).

The physician survey was done among a convenience sample of 50 physicians working in the health facilities located in the selected study areas of Sonipat and Vizag.

Inclusion criteria: We included physicians working in health facilities located in the sampled urban and rural areas of Sonipat and Vizag respectively and were willing to participate and provide informed consent.

Exclusion criteria: Those unwilling to provide informed consent were excluded.

The pharmacist survey was conducted among 350 pharmacists by trained research staff in the aforementioned selected study areas. Written informed consent was sought and obtained from the individuals prior to data collection and data collection comprised an interviewer administered questionnaire.

Inclusion criteria: We included pharmacists who were located in the sampled urban and rural areas of Sonipat and Vizag respectively, dispensing medicines for diabetes and hypertension, were willing to participate and provide informed consent.

Exclusion criteria: Those not dispensing medicines for diabetes and hypertension and unwilling to provide informed consent were excluded.

Table 4: Summary of indicators, measures, methods and instruments for the provider survey  
(physicians)

| Indicators                                                                                               | Measures                                                                                                      | Methods       | Instruments        |
|----------------------------------------------------------------------------------------------------------|---------------------------------------------------------------------------------------------------------------|---------------|--------------------|
| Socio-demographic details                                                                                | Age, gender, qualification, years of practice, patient load, training in diabetes and hypertension management | Questionnaire | Developed for UDAY |
| Knowledge and practice pertaining to diabetes and hypertension diagnosis and evaluation of complications | Signs and symptoms, diagnosis and cut-off levels for diagnosis, evaluation for complications                  | Questionnaire | Developed for UDAY |
| Treatment practices for diabetes and hypertension                                                        | Lifestyle modifications, prevention and management of complications, names of medicines prescribed commonly   | Questionnaire | Developed for UDAY |

#### Data collection for the health facility survey

Permission was sought and obtained from respective district medical/health officers prior to data collection and data collection comprised an interviewer administered questionnaire (Table

5). Trained research staff visited public healthcare facilities located in the aforementioned selected study areas and approached the person/ medical officer in charge.

The facility survey was done in 50 public healthcare facilities (sub-centres, primary and community health centres, taluk/district/tertiary hospitals) situated in the selected study areas of Sonipat and Vizag.

Table 5: Summary of indicators, measures, methods and instruments for the health facility survey

| Indicators                | Measures                                                                                                                                                                                                                                                                                                         | Methods                  | Instruments                                                                                             |
|---------------------------|------------------------------------------------------------------------------------------------------------------------------------------------------------------------------------------------------------------------------------------------------------------------------------------------------------------|--------------------------|---------------------------------------------------------------------------------------------------------|
| Coverage statistics       | Types of services offered, number of hours and days services provided per week, population covered, average daily outpatient department (OPD) attendance, number of beds available, status of National program for control and prevention of diabetes, cardiovascular disease and stroke (NPCDCS) implementation | Questionnaire            | Adapted from Service Availability and Readiness Assessment tool (SARA) of the World Health Organization |
| Recommended manpower list | Numbers working at District Hospitals, Community Health Centres, Primary Health Centres and Sub-centres against recommended numbers and reasons for lack of recommended personal. Additional manpower required                                                                                                   | Checklist, questionnaire | Adapted from Indian Public Health Standards, (IPHS) and SARA                                            |

|                                         |                                                                                                                                                                                                                                        |                          |                            |
|-----------------------------------------|----------------------------------------------------------------------------------------------------------------------------------------------------------------------------------------------------------------------------------------|--------------------------|----------------------------|
|                                         | for NCDs                                                                                                                                                                                                                               |                          |                            |
| Recommended medication list             | Availability of medicines at District Hospitals, Community Health Centres, Primary Health Centres and Sub-centres against recommended medicines and reasons for lack for recommended medicines. Additional medicines required for NCDs | Checklist, questionnaire | Adapted from IPHS and SARA |
| Recommended equipment list              | Numbers of equipment available at District Hospitals, Community Health Centres, Primary Health Centres and Sub-centres against recommended equipment and their functional status. Additional equipment required for NCDs               | Checklist, questionnaire | Adapted from IPHS and SARA |
| Recommended investigative services list | Investigative services available at District Hospitals, Community Health Centres, Primary Health Centres and Sub-centres against recommended services and reasons for their unavailability. Additional investigative services required | Checklist, questionnaire | Adapted from IPHS and SARA |

|                                                                          |                                                                                                                                                                                                                                                                  |                          |                            |
|--------------------------------------------------------------------------|------------------------------------------------------------------------------------------------------------------------------------------------------------------------------------------------------------------------------------------------------------------|--------------------------|----------------------------|
|                                                                          | for NCDs                                                                                                                                                                                                                                                         |                          |                            |
| Recommended activities list                                              | Frequency of recommended activities conducted and methods of conducting at District Hospitals, Community Health Centres, Primary Health Centres and Sub-centres for current diagnosis, treatment and health promotion. Reasons for not conducting the activities | Checklist, questionnaire | Adapted from IPHS and SARA |
| Availability of national guidelines and training of healthcare providers | Availability of national guidelines for diagnosis and management of diabetes, hypertension and CVD and training of healthcare providers in the facility to diagnose and manage diabetes, hypertension and CVD                                                    | Questionnaire            | Adapted from IPHS and SARA |

### Bio-sample collection and storage

Blood samples (in fasting state) were collected in plain, fluoride and EDTA vacutainers (Becton & Dickinson, USA) by trained phlebotomists in households or in camps arranged close to the households. Samples for estimation for blood glucose were kept in ice and transferred to laboratories within 2 hours of sample collection and immediately centrifuged. Samples were centrifuged at 2500 rpm for 15 minutes and serum / plasma were transferred into the cryo-vials which were stored in 20°C immediately. Buffy coat from EDTA vacutainers were separated and stored into cryo-vials for DNA extraction. Red blood cells were washed thrice with normal

1  
2 saline and were stored for analysis of fatty acids in future. First early morning voided urine was  
3  
4 collected from the participants and has been stored in deep freezer for future analysis of  
5  
6 metabolites. All these samples were transported to the biochemistry laboratory at the Public  
7  
8 Health Foundation of India (PHFI) in dry-ice on the day of collection from Sonipat and Vizag,  
9  
10 where they were stored at  $-80^{\circ}\text{C}$ .  
11  
12

13  
14  
15 All clinical chemistry parameters were analyzed on autoanalyzer Cobas 311 using reagents  
16  
17 from Roche Diagnostics, Switzerland. Glucose was estimated using Hexokinase method,  
18  
19 cholesterol by enzymatic cholesterol oxidase method, triglycerides by GPO-PAP method &  
20  
21 HDL and LDL by direct method, AST & ALT was estimated according to IFCC without  
22  
23 pyridoxal phosphate, bilirubin total by Diazonium ion method, bilirubin direct by Diazo with  
24  
25 sulphanilic acid method, urea by kinetic method, creatinine by Jaffe's method, and urinary  
26  
27 microalbumin using immuno turbidimetric method. HbA1c was assayed by hplc method using  
28  
29 reagents from Bio-Rad Laboratories, Hercules, CA.  
30  
31  
32

33  
34  
35 Two levels of internal controls were run with every batch of samples. The intra assay and inter  
36  
37 assay coefficient of variation for all the parameters were  $<3\%$  and  $<5\%$  respectively.  
38  
39

40  
41 The biochemistry laboratory is part of External Quality Assurance program from RIQAS for  
42  
43 clinical chemistry parameters and HbA1c assay.  
44  
45

#### 46 47 Geographical Information System (GIS) based mapping of study households and 48 49 neighborhood built environment 50

51  
52 All households as well as the study areas, including various points of interest as indicated  
53  
54 below were geocoded using GIS mapping. This will be used to comprehensively assess the  
55  
56 built environment and its impact on diabetes hypertension and risk factors. GIS based  
57  
58  
59  
60



techniques will be employed to study the association between built environment (BE) features and diabetes, hypertension and related risk factors.

Specially trained field staff visited all participant households and used handheld Garmin™ GPS receivers to capture GPS locations of the households. The captured GPS coordinates were verified using Google Earth to see if the locations matched the actual locations.

Table 6 below shows the built environment features from the study areas that were located and mapped.

Table 6: Characteristics of the built environment in study sites

| Environment features                     | Points of interest                                             | N      | Sonipat | Vizag |
|------------------------------------------|----------------------------------------------------------------|--------|---------|-------|
| Healthcare facilities                    | Government hospitals                                           | 64     | 36      | 28    |
|                                          | Private hospitals & clinics                                    | 228    | 147     | 81    |
|                                          | Registered medical practitioners and unqualified practitioners | 220    | 195     | 25    |
|                                          | Other health professionals                                     | 120    | 115     | 3     |
|                                          | Pharmacies                                                     | 337    | 224     | 113   |
|                                          | Medical laboratories                                           | 46     | 30      | 16    |
|                                          | Food outlets                                                   | Hotels | 162     | 4     |
| Restaurants                              |                                                                | 33     | 10      | 23    |
| Small eateries                           |                                                                | 97     | 40      | 57    |
| Provision / department stores            |                                                                | 313    | 196     | 117   |
| Fruit / vegetable / juice outlets        |                                                                | 254    | 36      | 218   |
| Meat / fish shops                        |                                                                | 128    | 24      | 104   |
| Public distribution system (ration)shops |                                                                | 52     |         | 52    |

|                         |                               |     |     |     |
|-------------------------|-------------------------------|-----|-----|-----|
|                         | Milk outlets                  | 126 | 344 | 122 |
|                         | Bakeries/ sweet shops         | 106 | 56  | 50  |
| Tobacco outlets         | Pan shop                      | 713 | 17  | 696 |
| Alcohol outlets         | Authorized government outlets | 45  | 31  | 14  |
|                         | Unauthorized alcohol outlets  | 100 |     | 100 |
| Recreational facilities | Parks                         | 91  | 62  | 29  |
|                         | Walking tracks                | 6   |     | 6   |
|                         | Play grounds                  | 50  | 43  | 7   |
|                         | Fitness / yoga centers        | 10  | 6   | 4   |
| Other                   | Anganwadis, schools, temples  | 633 | 124 | 509 |
|                         | etc.                          |     |     |     |

Household GPS locations and neighborhood BE features were integrated with participant data collected as part of the baseline data collection. An overview of the GIS mapping is provided in Figure 3. Area boundaries were obtained from government records and digitized. All spatial data was integrated into a spatial database and ArcGIS™ software will be used to carry out following spatial analysis methods.

- Distance calculations: distance between participant households and features of interest such as health care facilities, food and alcohol outlets, parks etc. and their association between CMD and risk factors.
- Spatial aggregation: Aggregation of features such as number of food outlets, parks etc. in the neighbourhood and relationship with CMD and risk factors.

- Clustering: Identify clustering of CMD and risk factors (hotspots) and determine if disease clusters are of sufficient geographic size and concentration to have not occurred by chance.
- Spatial smoothing and interpolation: Used to derive a spatial surface from sampled data points (filling in where data are unobserved) or to smooth across polygons (aggregate data) to create more robust estimates.
- Spatial regression: Use of Spatial regression methods such as Geographically weighted regression (GWR) to further understand the relationship between built environment and CMD risk factors as standard statistical regression models, which assume independence of the observations, are not appropriate for analysing spatially dependent data.

Figure 3: GIS mapping overview

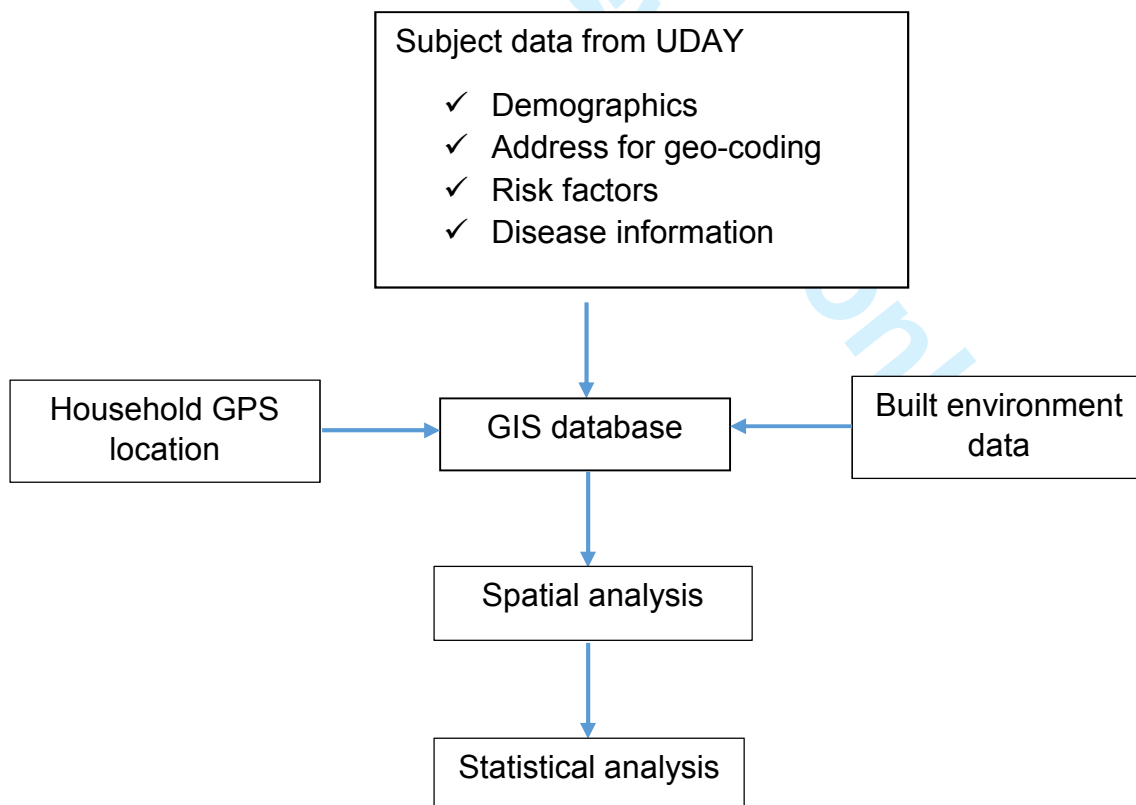

## Data management

Data were collected in electronic format using customized android based software on a tablet platform and uploaded to server on a real time basis (Figure 4). For ensuring quality control, all validation, range and logical checks were in-built in the software. Error reports were generated bi-weekly and sent to the study sites for rectification. Errors were checked against completion of the questionnaire, identifiers and adherence to the sampling strategy of interviews (only one man and one woman from single household).

Further, site research teams identified any other issues and reported to centralized team for the corrections. Data correction took place concomitantly with the conduct of the baseline survey. Similarly, bio-sample reports were matched with participant questionnaires and the final data was locked after all matching, and rectification of errors.

Figure 4: Data collection and management pathway

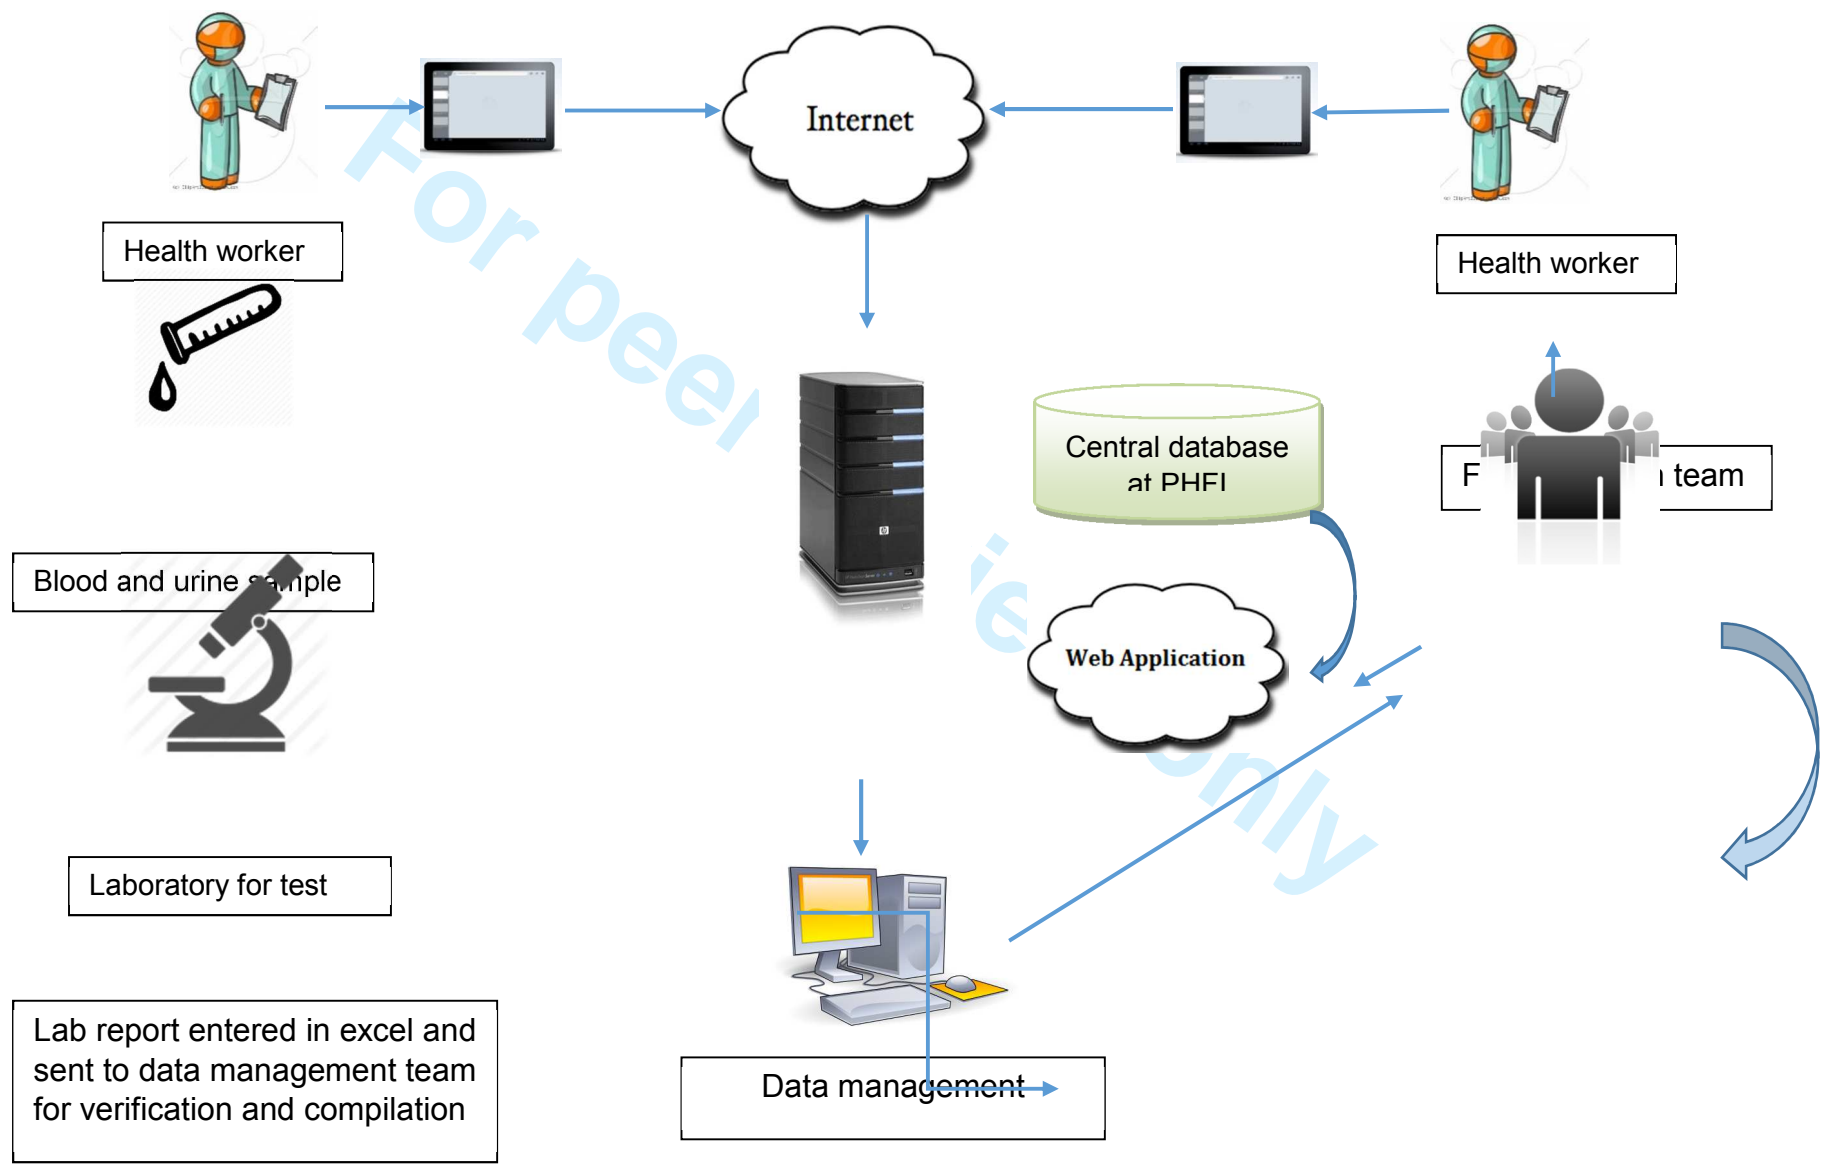

1  
2  
3  
4  
5  
6  
7  
8  
9  
10  
11  
12  
13  
14  
15  
16  
17  
18  
19  
20  
21  
22  
23  
24  
25  
26  
27  
28  
29  
30  
31  
32  
33  
34  
35  
36  
37  
38  
39  
40  
41  
42  
43  
44  
45  
46  
47  
48  
49

1  
2  
3  
4  
5  
6  
7  
8  
9  
10  
11  
12  
13  
14  
15  
16  
17  
18  
19  
20  
21  
22  
23  
24  
25  
26  
27  
28  
29  
30  
31  
32  
33  
34  
35  
36  
37  
38  
39  
40  
41  
42  
43  
44  
45  
46  
47  
48  
49

For peer review only

### Analysis plan

Data were entered into a database designed specifically for the project, housed at PHFI and accessible only to investigators and designated study staff. Data will be analysed using Stata/SE version 10.1 for windows software. Descriptive statistics will be done and the data expressed as frequencies and percentages for categorical variables and means and standard deviations for normally distributed continuous variables or inter-quartile ranges otherwise. Differences between gender groups, age groups, socio-economic groups, study sites, time periods and individual hypotheses will be tested using appropriate analytical statistical tests (Chi-square tests for categorical variables, t-tests continuous variables, multiple linear regression for continuous variables, and multiple logistic regression for categorical variables). Stratified analysis will be done to assess for potential confounding and effect modification by other variables. A p-value of < 0.05 will be considered to indicate statistical significance. Multi-level modelling will be undertaken by clusters and households as potential levels.

### Intervention program

We propose to implement a priority set of synergistic innovative ecosystem interventions (Figure 5, Table 7), with the overarching goal to prevent, detect, reduce the risk of diabetes and hypertension and to improve the treatment and management of individuals with either of the conditions in the study sites. We hypothesize (Figure 6) that education of the public on diabetes, hypertension and related risks will lead to increased self-referral and prevention, while education of the healthcare providers will promote opportunistic screening for diabetes, hypertension and related risks, and

purposeful implementation of evidence based diagnostic (to screen, stratify by risk) and management guidelines (to initiate appropriate therapy).

Figure 5: Priority interventions in UDAY

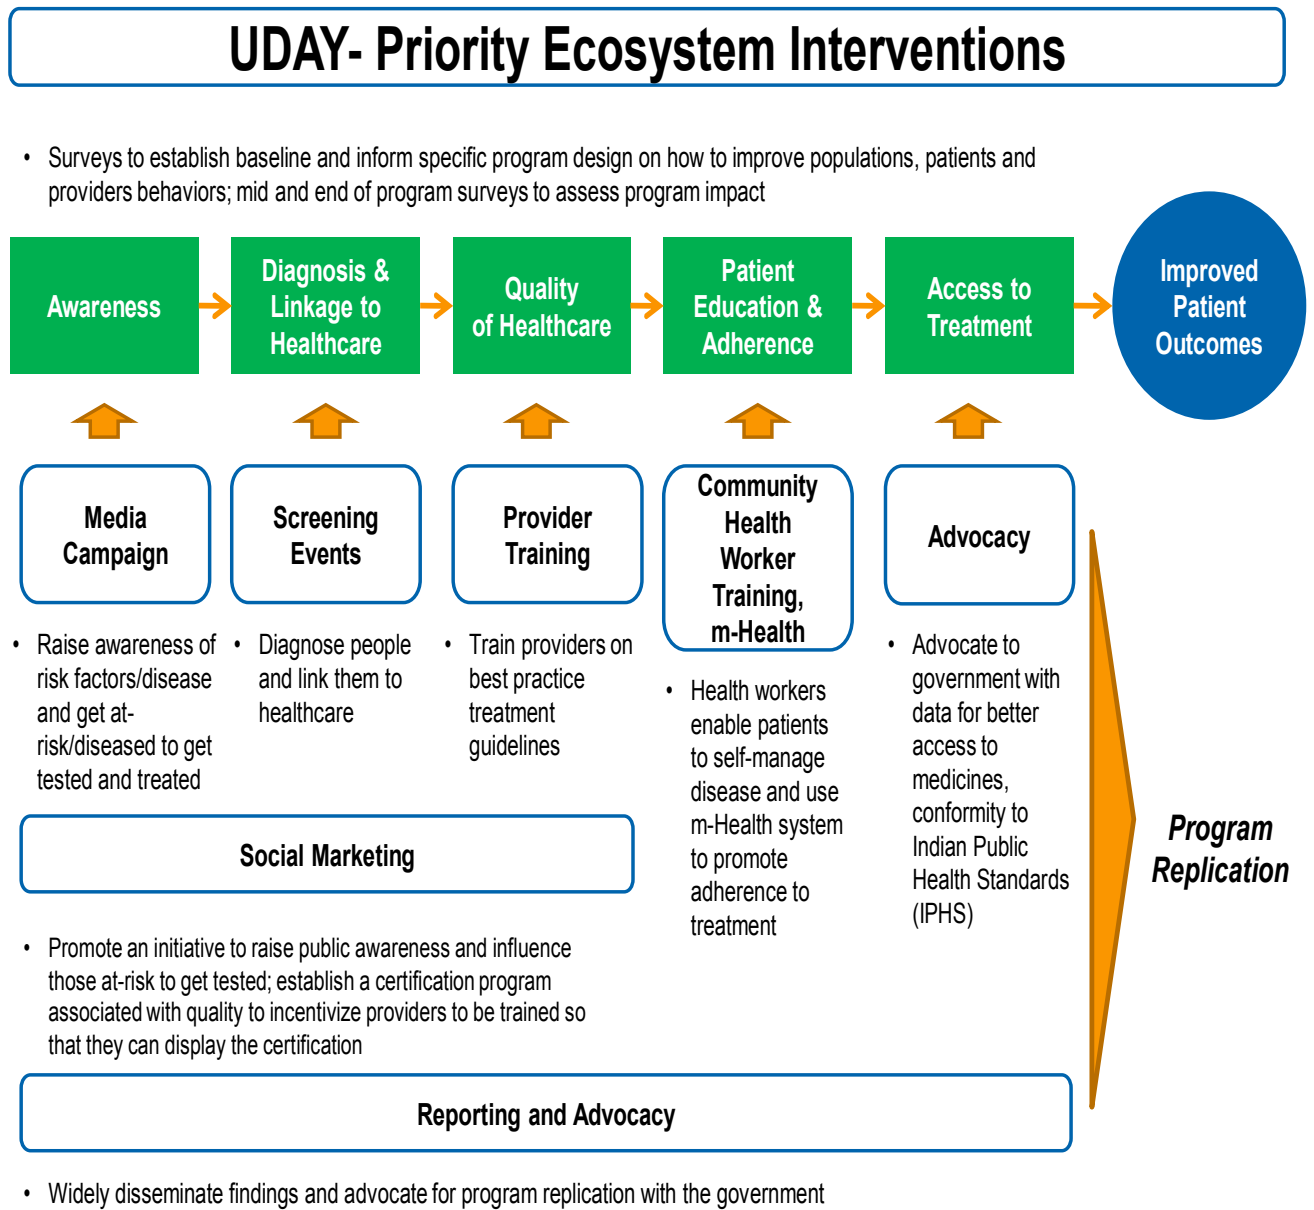



Figure 6: Intervention framework

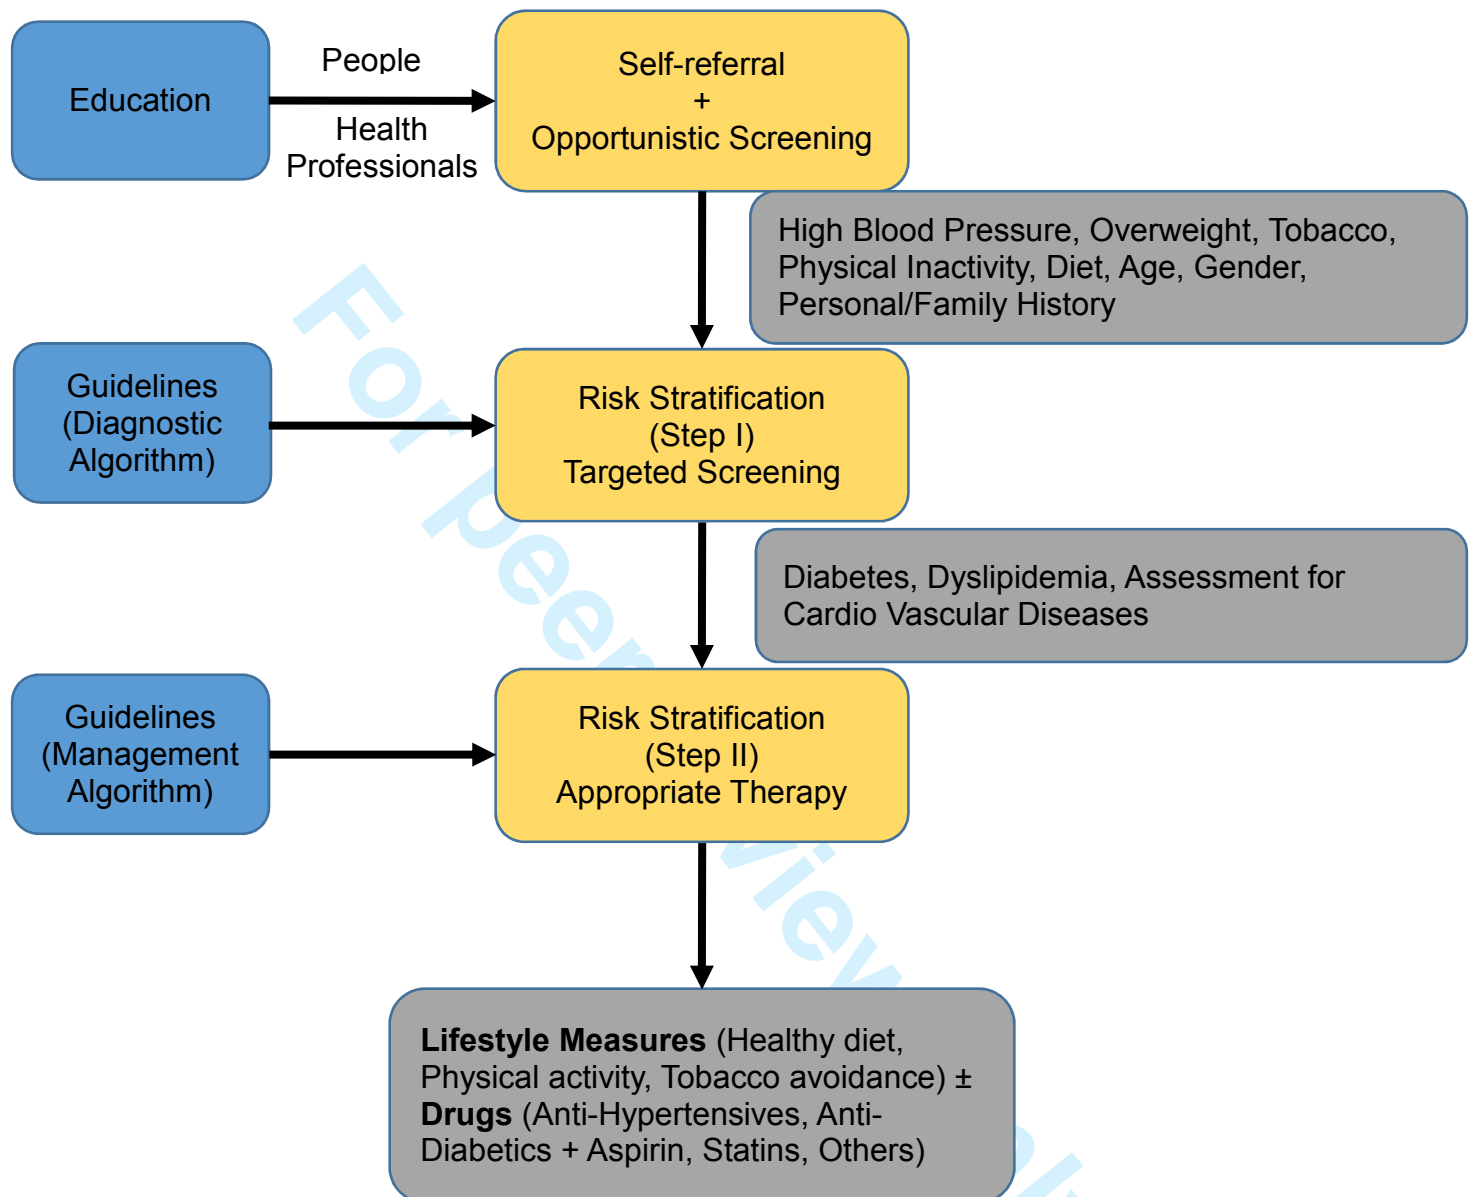

Following the baseline assessments a comprehensive intervention program is being currently implemented. The intervention components includes:

1. tailored health promotion using social marketing approaches for increasing public awareness and promoting population risk factor modification and reduction;

2. community based screening of all adults aged  $\geq 30$  years for identifying those at high risk of diabetes and/or hypertension or with disease to link to the healthcare system leveraging task-sharing approaches utilizing technology enabled health workers;
3. patient education using technology enabled health workers,
4. healthcare provider training on evidence based management guidelines,
5. implementation of a quality improvement program and diabetes registry and;
6. advocacy with governments and other stakeholders to improve access to healthcare.

It is expected that the comprehensive interventions will increase over baseline the levels of: public awareness and knowledge about diabetes and hypertension; those aware, diagnosed, treated and controlled to recommended targets; the use of guideline based management by providers leading to improved health outcomes and access to healthcare for people living with diabetes and hypertension in India as well as provide a model of healthcare which is low-cost, community based and context relevant in a milieu of rapid rise in these chronic conditions.

Table 7: Innovations in UDAY

| Intervention domain                                      | Approach                                        | Target               |
|----------------------------------------------------------|-------------------------------------------------|----------------------|
| Prevention, early detection and referral                 | Culturally tailored health promotion, screening | 400,000 population   |
| Capacity building, task shifting of healthcare providers | CME, short trainings, distance learning, QIP    | Healthcare providers |
| Early diagnosis and prevention of complications          | Registry                                        | 10,000 patients      |

|                                                                                 |                                  |                  |
|---------------------------------------------------------------------------------|----------------------------------|------------------|
| m-health system                                                                 | Electronic data system<br>+DSS   | Adult population |
| Electronic data capture                                                         | Tablet based surveys             | 12,000           |
| Spatial and built<br>environment assessment                                     | GIS mapping                      | All study areas  |
| Improved access to<br>medicines by social<br>marketing initiatives              | Improving quality of<br>services | 300 pharmacists  |
| Culturally tailored patient<br>education and networks for<br>enabling self-care | Utilizing health workers         | Patients         |

## Discussion

UDAY is one of the largest community based intervention studies established in India to implement and evaluate a multi-component, multi-level, cost-effective, comprehensive intervention program to concomitantly improve the prevention, detection and optimal management of diabetes and hypertension, which together constitute the leading NCDs in India. Their high and rising burden coupled with huge healthcare costs underlines the need for cost-effective community based approaches supplemented by measures to strengthen the health system to address both these NCDs effectively as envisaged in UDAY.

Individuals with diabetes or hypertension often require similar lifestyle therapy (healthy diet, physical activity, smoking cessation) and similar long-term drug therapy for prevention of complications (cholesterol and glucose lowering drugs, aspirin, ACE inhibitors and other blood pressure lowering drugs). Proven lifestyle interventions which can prevent the onset of diabetes (healthy diet and physical activity) are similar to those proven to reduce the risk of developing hypertension, coronary heart disease or stroke.

The strategic approaches and operational elements for prevention and control of

1  
2  
3 diabetes hypertension and CVD are thus similar or closely interlinked, whether it is  
4  
5 primordial prevention (preventing the acquisition of risk factors in the first place),  
6  
7  
8 primary prevention (preventing onset of disease by reducing risk factors which are  
9  
10 elevated) or secondary prevention (reducing the risk of complications after the onset of  
11  
12 disease). Further, hypertension is easily measurable, diagnosable and treatable with  
13  
14 effective medications and additionally in community settings, it provides an easy entry  
15  
16 point to diagnose and manage chronic illness such as diabetes and CVD which involve  
17  
18 long-term continued care. Synergies in management of both can lead to improved  
19  
20 health outcomes, cost savings, better use of scarce human and financial resources.  
21  
22 Despite the availability of effective and affordable therapies both pharmacological and  
23  
24 non-pharmacological, the management of both diabetes and hypertension India is  
25  
26 suboptimal in rural as well as urban settings with typical control rates between 10-15%.  
27  
28 Multiple reasons are attributed to this inadequate levels of control and failure to attain  
29  
30 treatment targets. These include the largely asymptomatic nature of diabetes and  
31  
32 hypertension coupled with low awareness, inadequate access to the healthcare system,  
33  
34 delays in diagnosis, lack of targeted screening practices as well as poor adherence to  
35  
36 prescribed medications and complexities associated with taking multiple medications.  
37  
38 Further, even among those with established diabetes and CVD, the use of proven  
39  
40 lifesaving therapies for secondary prevention is sub-optimal. The intervention framework  
41  
42 in UDAY takes into account these impeding factors and the interventions proposed  
43  
44 endeavors to address all of these better prevention and control. In addition, a unique  
45  
46 prospective community and hospital based registry program with implementation of  
47  
48 quality improvement program comprising an electronic decision support system with  
49  
50 evidence based guidelines for management will provide the opportunity to assess  
51  
52  
53  
54  
55  
56  
57  
58  
59  
60

1  
2  
3 clinical practice patterns, quality of care, and partner healthcare providers' in improving  
4 management. Further, the community based cohorts established will not only facilitate  
5 tracking of the trends in risk factors and diseases in rapidly transitioning populations in  
6 India, but also serve as well characterized population platforms for embedding and  
7 evaluating new research questions of public health relevance in combating the rise of  
8 NCDs. Notably, a unique strength of UDAY besides occurring in a developing country  
9 setting where there are limited community based projects, in comparison to various  
10 other community based projects conducted in both developed and developing countries,  
11 which have either addressed prevention or management of select chronic conditions, is  
12 that UDAY aims to address both prevention and management of concurrently and  
13 comprehensively.  
14  
15  
16  
17  
18  
19  
20  
21  
22  
23  
24  
25  
26  
27  
28

29 It is anticipated that the results obtained from the study will inform policy makers on the  
30 most appropriate community and health system based approaches that are effective in  
31 stemming the rising burden of diabetes and hypertension in India and countries with  
32 similar challenges.  
33  
34  
35  
36  
37  
38  
39  
40  
41  
42  
43  
44  
45  
46  
47  
48  
49  
50  
51  
52  
53  
54  
55  
56  
57

## 58 Appendix

1  
2  
3 Sonipat district in the state of Haryana, is north of India's capital city Delhi. It covers an  
4 area of 2,122 sq. km and has a population of 1,450,001 (Census 2011). The district has  
5  
6  
7  
8 4 tehsils (sub-districts), namely Gohana, Ganaur, Sonipat and Kharkhoda. Among  
9  
10 these, we selected Sonipat tehsil as the urban sub-site and Kharkhoda as the rural sub-  
11  
12 site.  
13

14  
15 Vizag district is one of the north eastern coastal district in the state of Andhra Pradesh  
16 and lies in proximity to the Bay of Bengal. It covers an area of 11,161 sq. km and has a  
17  
18 population of 4,290,589 (Census 2011). Vizag district has 43 mandals (sub-districts)  
19  
20 comprising 4 urban mandals and 39 rural mandals. Among these, we selected Vizag as  
21  
22 the urban sub-site and Makavarapalem and Nathavaram as the rural sub-site.  
23  
24  
25  
26  
27  
28

### 29 **Data sharing and Contributorship statement**

30  
31 Data will be available to the study investigators only. De-identified data can be shared  
32  
33 with other researchers based on specific request to the publication sub-committee of the  
34  
35 project with potential research questions to be examined.  
36  
37  
38  
39

40  
41 Sailesh Mohan, K. Srinath Reddy, Dorairaj Prabhakaran and Nikhil Tandon conceived  
42  
43 the study. Sailesh Mohan wrote the first draft of the manuscript. Prashant Jarhyan,  
44  
45 Shreeparna Ghosh, Nikhil Srinivasapura Venkateshmurthy, Ritu Rana, Cheena  
46  
47 Malhotra, Ruby Gupta, Bhaskara Rao and Sanjay Kalra wrote specific sections of the  
48  
49 manuscript as well as contributed to the design and implementation of the study.  
50  
51  
52 Bhaskara Rao and Sanjay Kalra also coordinate the activities in the study sites and  
53  
54 provide technical support. Sailesh Mohan, Shreeparna Ghosh, Prashant Jarhyan, and  
55  
56 Nikhil Srinivasapura Venkateshmurthy contributed to the collection and assembly of  
57  
58  
59  
60

1  
2  
3 data. All authors provided input into the study design, as well as provided critical  
4  
5 intellectual input for revision of the manuscript and approved the final version of the  
6  
7 manuscript.  
8  
9

### 10 11 12 **Acknowledgements**

13  
14 The UDAY project is led by the Public Health Foundation of India, Gurgaon, India in  
15  
16 collaboration with Population Services International, India and Project HOPE. We  
17  
18 acknowledge the contributions of the field and research staff of the project. The funder  
19  
20 has no role in the design, implementation, and evaluation of the project as well as in the  
21  
22 writing of this paper. All contents of this paper are solely the responsibility of the  
23  
24 authors.  
25  
26  
27

### 28 29 **Funding source**

30  
31 It is supported by an unrestricted educational grant from Eli Lilly and Company under  
32  
33 the Lilly NCD Partnership Program.  
34  
35

### 36 37 **Disclaimer**

38  
39 The funding agency had no role in the design, conduct or analysis of the study, and no  
40  
41 role in the decision to submit the protocol for publication.  
42

### 43 44 **Conflicts of interest**

45  
46 None declared  
47  
48  
49  
50  
51  
52  
53  
54  
55  
56  
57  
58  
59  
60

## References

1. National Multisectoral Action Plan for Prevention and Control of NCDs in India. World Health Organization (WHO) Country Office for India, New Delhi, 2013.
2. International Diabetes Federation. IDF Diabetes Atlas, 7th edition. 7th ed. Brussels, Belgium: International Diabetes Federation, 2015.
3. Reddy KS, Shah B, Varghese C, et al. Responding to the threat of chronic diseases in India. *Lancet* 2005; 366:1744-49.
4. Mohan S, Koller T. Hypertension and related comorbidities in India: Implications for the health system. World Health Organization (WHO) Country Office for India, New Delhi, 2013.
5. Nair M, Ali MK, Ajay VS, et al. CARRS Surveillance study: design and methods to assess burdens from multiple perspectives. *BMC Public Health* 2012;12:701.
6. Reddy KS, Prabhakaran D, Chaturvedi V, et al. Methods for establishing a surveillance system for cardiovascular diseases in Indian industrial populations. *Bull World Health Organ* 2006; 84:461-69.
7. International Institute for Population Sciences (IIPS) and Macro International. 2007. National Family Health Survey (NFHS-3), 2005–06: India: Volume II. Mumbai: IIPS.
8. World Health Organization. Global Physical Activity Questionnaire (GPAQ) Analysis Guide: World Health Organization. Available at: [http://www.who.int/chp/steps/resources/GPAQ\\_Analysis\\_Guide.pdf](http://www.who.int/chp/steps/resources/GPAQ_Analysis_Guide.pdf) (Assessed 15 December 2015)
9. Yusuf S, Hawken S, Ounpuu S, et al. Effect of potentially modifiable risk factors associated with myocardial infarction in 52 countries (the INTERHEART study): case-control study. *Lancet* 2004; 364:937-52.
10. EuroQol Group. EuroQol--a new facility for the measurement of health-related quality of life. *Health Policy* 1990; 16:199–208.
11. Poongothai S, Pradeepa R, Ganesan A, et al. Reliability and validity of a modified PHQ9 item inventory (PHQ12) as a screening instrument for assessing depression in Asian Indians (CURES—65). *J Assoc Physicians India* 2009; 57: 147–52.



1  
2  
3  
4  
5  
6  
7  
8  
9  
10  
11  
12  
13  
14  
15  
16  
17  
18  
19  
20  
21  
22  
23  
24  
25  
26  
27  
28  
29  
30  
31  
32  
33  
34  
35  
36  
37  
38  
39  
40  
41  
42  
43  
44  
45  
46  
47  
48  
49  
50  
51  
52  
53  
54  
55  
56  
57  
58  
59  
60

For peer review only

1  
2  
3  
4  
5  
6  
7  
8  
9  
10  
11  
12  
13  
14  
15  
16  
17  
18  
19  
20  
21  
22  
23  
24  
25  
26  
27  
28  
29  
30  
31  
32  
33  
34  
35  
36  
37  
38  
39  
40  
41  
42  
43  
44  
45  
46  
47  
48  
49  
50  
51  
52  
53  
54  
55  
56  
57  
58  
59  
60

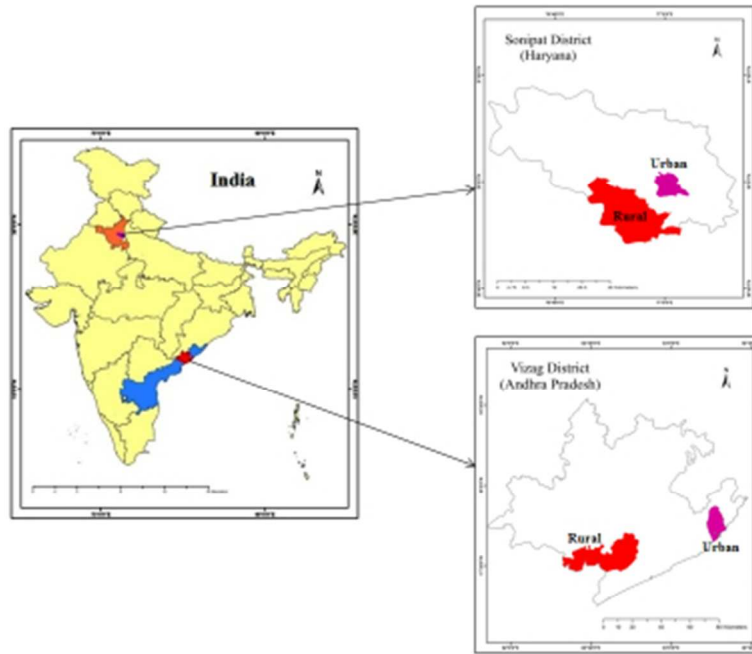

40x30mm (300 x 300 DPI)

Review only

1  
2  
3  
4  
5  
6  
7  
8  
9  
10  
11  
12  
13  
14  
15  
16  
17  
18  
19  
20  
21  
22  
23  
24  
25  
26  
27  
28  
29  
30  
31  
32  
33  
34  
35  
36  
37  
38  
39  
40  
41  
42  
43  
44  
45  
46  
47  
48  
49  
50  
51  
52  
53  
54  
55  
56  
57  
58  
59  
60

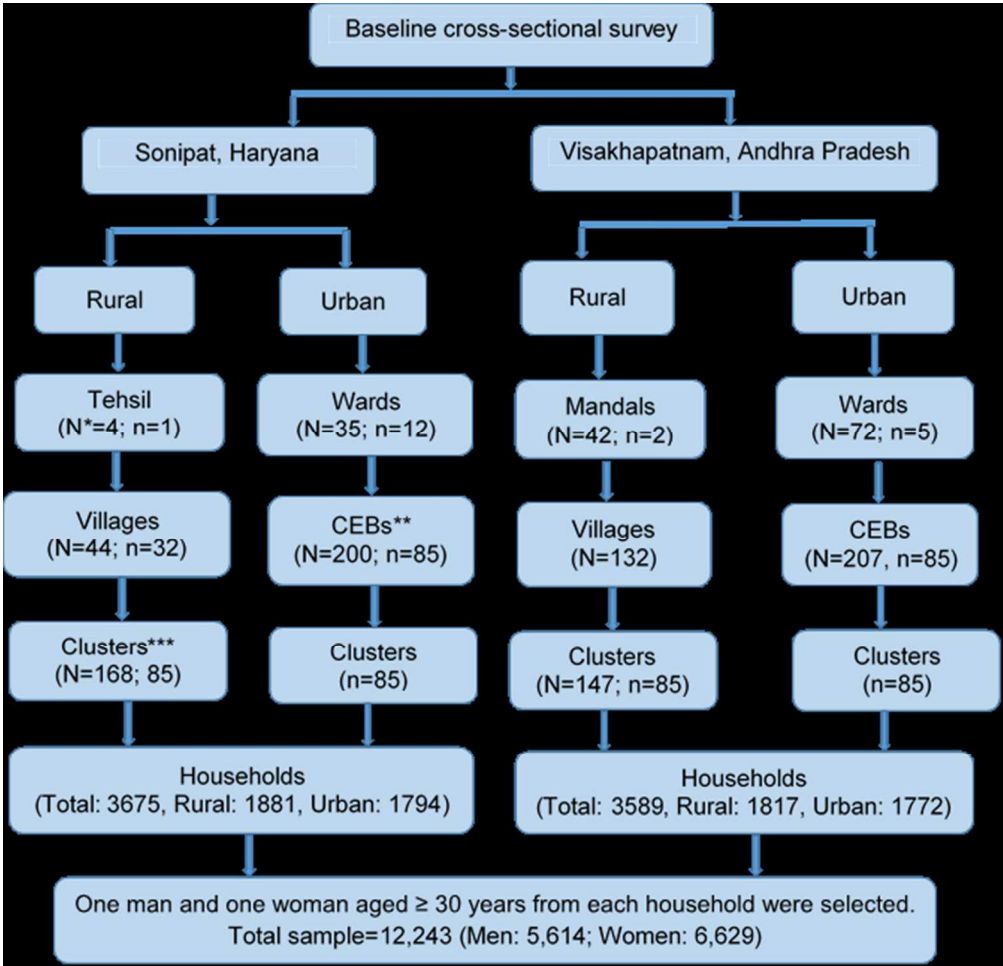

56x54mm (300 x 300 DPI)

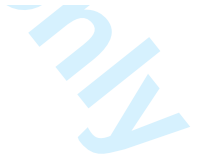

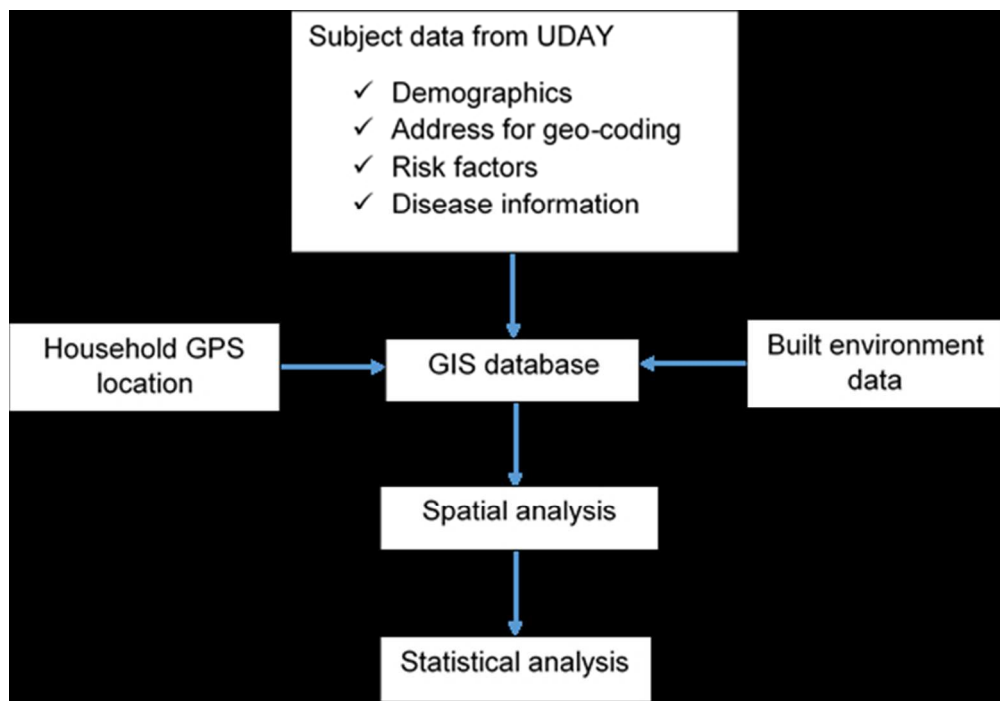

48x33mm (300 x 300 DPI)

View only

1  
2  
3  
4  
5  
6  
7  
8  
9  
10  
11  
12  
13  
14  
15  
16  
17  
18  
19  
20  
21  
22  
23  
24  
25  
26  
27  
28  
29  
30  
31  
32  
33  
34  
35  
36  
37  
38  
39  
40  
41  
42  
43  
44  
45  
46  
47  
48  
49  
50  
51  
52  
53  
54  
55  
56  
57  
58  
59  
60

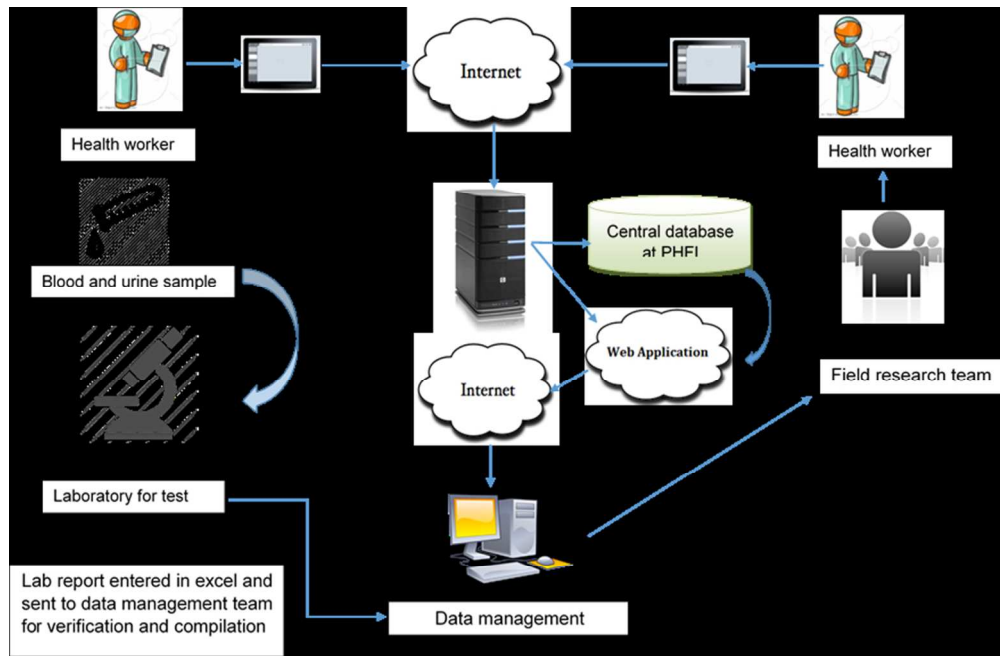

74x48mm (300 x 300 DPI)

1  
2  
3  
4  
5  
6  
7  
8  
9  
10  
11  
12  
13  
14  
15  
16  
17  
18  
19  
20  
21  
22  
23  
24  
25  
26  
27  
28  
29  
30  
31  
32  
33  
34  
35  
36  
37  
38  
39  
40  
41  
42  
43  
44  
45  
46  
47  
48  
49  
50  
51  
52  
53  
54  
55  
56  
57  
58  
59  
60

## UDAY- Priority Ecosystem Interventions

- Surveys to establish baseline and inform specific program design on how to improve populations, patients and providers behaviors; mid and end of program surveys to assess program impact

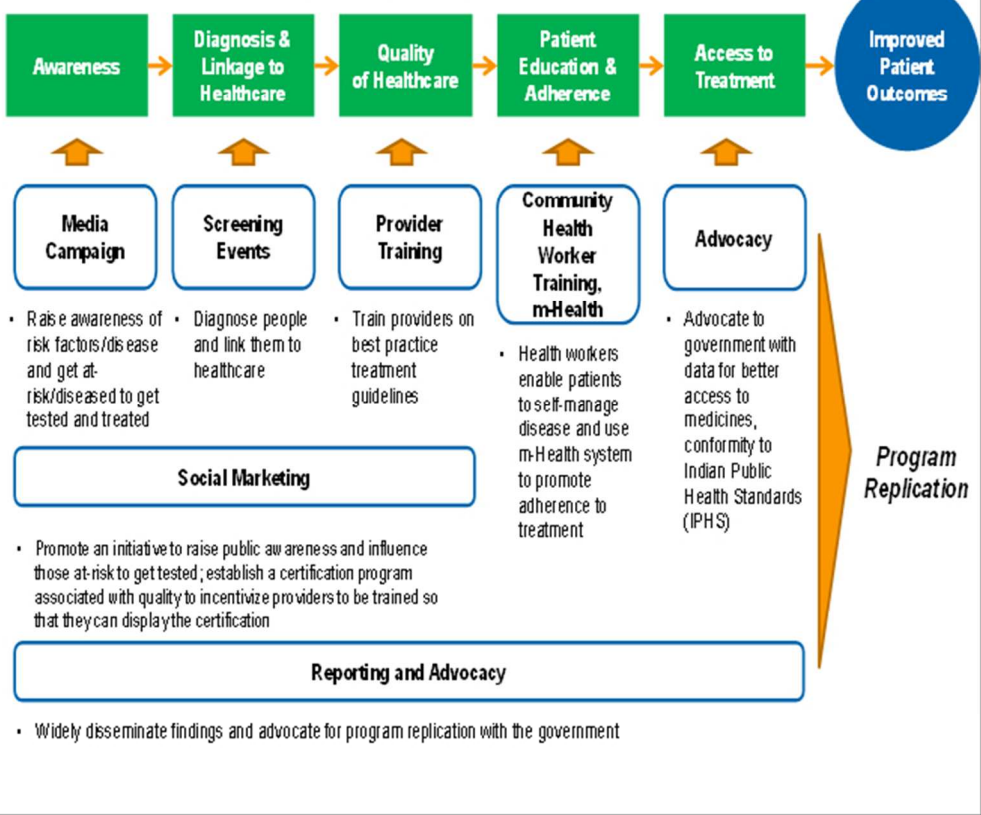

56x58mm (300 x 300 DPI)

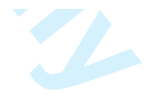

1  
2  
3  
4  
5  
6  
7  
8  
9  
10  
11  
12  
13  
14  
15  
16  
17  
18  
19  
20  
21  
22  
23  
24  
25  
26  
27  
28  
29  
30  
31  
32  
33  
34  
35  
36  
37  
38  
39  
40  
41  
42  
43  
44  
45  
46  
47  
48  
49  
50  
51  
52  
53  
54  
55  
56  
57  
58  
59  
60

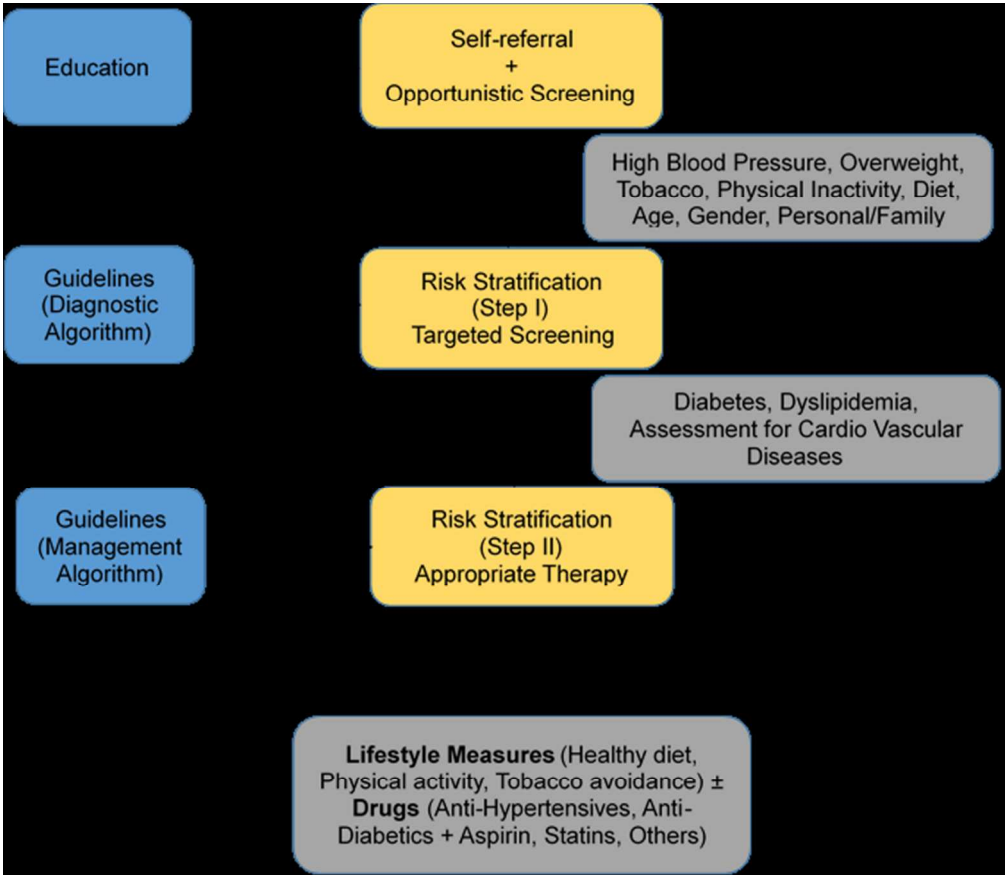

57x50mm (300 x 300 DPI)

only

# BMJ Open

## UDAY: Protocol of a Comprehensive Diabetes and Hypertension Prevention and Management Program in India

|                                 |                                                                                                                                                                                                                                                                                                                                                                                                                                                                                                                                                                                                                                                    |
|---------------------------------|----------------------------------------------------------------------------------------------------------------------------------------------------------------------------------------------------------------------------------------------------------------------------------------------------------------------------------------------------------------------------------------------------------------------------------------------------------------------------------------------------------------------------------------------------------------------------------------------------------------------------------------------------|
| Journal:                        | <i>BMJ Open</i>                                                                                                                                                                                                                                                                                                                                                                                                                                                                                                                                                                                                                                    |
| Manuscript ID                   | bmjopen-2017-015919.R1                                                                                                                                                                                                                                                                                                                                                                                                                                                                                                                                                                                                                             |
| Article Type:                   | Protocol                                                                                                                                                                                                                                                                                                                                                                                                                                                                                                                                                                                                                                           |
| Date Submitted by the Author:   | 01-Aug-2017                                                                                                                                                                                                                                                                                                                                                                                                                                                                                                                                                                                                                                        |
| Complete List of Authors:       | Mohan, Sailesh; Public Health Foundation of India<br>Jarhyan, Prashant; Public Health Foundation of India<br>Ghosh, Shreeparna; Public Health Foundation of India<br>Srinivasapura Venkateshmurthy, Nikhil; Public Health Foundation of India<br>Gupta, Ruby; Public Health Foundation of India<br>Rana, Ritu; Population Services International India<br>Malhotra, Cheena; Project Hope India<br>Rao, Bhaskara; MaxCure Hospital<br>Kalra, Sanjay; Bharti Hospital Karnal<br>Tandon, Nikhil; All India Institute of Medical Sciences,<br>Reddy, KS; Public Health Foundation of India<br>Prabhakaran, Dorairaj; Public Health Foundation of India |
| <b>Primary Subject Heading</b>: | Epidemiology                                                                                                                                                                                                                                                                                                                                                                                                                                                                                                                                                                                                                                       |
| Secondary Subject Heading:      | Diabetes and endocrinology, Health services research, Public health, Cardiovascular medicine                                                                                                                                                                                                                                                                                                                                                                                                                                                                                                                                                       |
| Keywords:                       | Hypertension < CARDIOLOGY, General diabetes < DIABETES & ENDOCRINOLOGY, EPIDEMIOLOGY                                                                                                                                                                                                                                                                                                                                                                                                                                                                                                                                                               |
|                                 |                                                                                                                                                                                                                                                                                                                                                                                                                                                                                                                                                                                                                                                    |

SCHOLARONE™  
Manuscripts



1  
2  
3 **UDAY: Protocol of a Comprehensive Diabetes and Hypertension Prevention and**  
4  
5 **Management Program in India**  
6  
7  
8  
9

10 Authors: Sailesh Mohan,<sup>1</sup> Prashant Jarhyan,<sup>1</sup> Shreeparna Ghosh,<sup>1</sup> Nikhil  
11  
12 Srinivasapura Venkateshmurthy,<sup>1</sup> Ruby Gupta,<sup>1</sup> Ritu Rana,<sup>2</sup> Cheena Malhotra,<sup>3</sup>  
13  
14 Bhaskara Rao,<sup>4</sup> Sanjay Kalra,<sup>5</sup> Nikhil Tandon,<sup>6</sup> K. Srinath Reddy,<sup>1</sup> Dorairaj  
15  
16 Prabhakaran<sup>1</sup>  
17  
18  
19  
20

21 <sup>1</sup> Public Health Foundation of India, Gurgaon, India  
22

23 <sup>2</sup> Population Services International, Delhi, India  
24

25 <sup>3</sup> Project HOPE, Delhi, India  
26

27 <sup>4</sup> Manipal Hospitals, Visakhapatnam, India  
28

29 <sup>5</sup> Bharti Hospital, Karnal, India  
30

31 <sup>6</sup> All India Institute of Medical Sciences, Delhi, India  
32  
33  
34  
35  
36  
37  
38  
39  
40  
41  
42  
43  
44  
45  
46  
47  
48  
49  
50

51 Corresponding author  
52 Dr. Sailesh Mohan  
53 Additional Professor  
54 Public Health Foundation of India  
55 Email:smohan@phfi.org  
56  
57  
58  
59  
60

## Abstract

### Introduction

Diabetes and hypertension are two leading noncommunicable conditions, which are sub-optimally managed in India. Thus, innovative comprehensive approaches that can concomitantly improve their detection, prevention and control are warranted.

### Methods and analysis

UDAY, a 5-year initiative aims to reduce the risk of diabetes and hypertension and improve management by implementing a comprehensive intervention program in the two selected study sites, Sonipat and Visakhapatnam (Vizag). It has a pre-post evaluation design with representative cross-sectional surveys before and after intervention. Within these two sites, urban and rural sub-sites each with a total population of approximately 1, 00,000 people each were selected and a baseline and post intervention assessment will be conducted deploying 5 surveys [among general population (including body measurements or bio-samples), patients, healthcare providers including physicians and pharmacists, health facilities] which will determine: the knowledge levels about diabetes and hypertension, the proportion treated and controlled; the patient knowledge and self-management skills; healthcare providers' management practices; the level of access and barriers to obtaining care. The interventions will include: tailored health promotion for improving public knowledge; screening of adults aged  $\geq 30$  years for identifying those at high risk of diabetes and/or hypertension for linkage to the healthcare system; patient education using technology enabled community health workers, geographic information system (GIS) based mapping of the communities, healthcare provider training on management guidelines, community based diabetes registry and; advocacy to improve access to healthcare. The baseline surveys have been completed, the study areas mapped using GIS and the interventions are being implemented. UDAY is expected to increase over baseline the levels of: public knowledge about diabetes and hypertension; those treated and controlled; patient self-management skills; the use of guideline based management by providers and; access to healthcare, leading to improved health outcomes and inform development of a India relevant chronic care model.

### Ethics and dissemination

Ethical clearance for conduct of the study was obtained from the Institutional Ethics Committee (IEC) of the Public Health Foundation of India. The findings will be targeted primarily at public health policymakers and advocates, but will be disseminated widely through other mechanisms including conference presentations and peer-reviewed publications, as well as to the participating communities.

### Strengths and limitations of this study

- Unique large community based study in geographically and culturally diverse “real world” settings in India for improving prevention and control of diabetes and hypertension.
- Employs a comprehensive multi-level, multi component intervention approach to target the general population, patients, providers and to strengthen the health system for improving prevention and control of diabetes and hypertension.
- Concomitantly addresses detection, prevention and management of both diabetes and hypertension.
- Extensively leverages mobile technology to enable health workers in task sharing as well as for electronic data capture.
- Quasi experimental design with complex intervention may hinder attribution of specific effect to individual intervention components.

## Introduction

Non-communicable Diseases (NCDs) are currently the leading cause of preventable death and disability in India, accounting for two out of every three deaths [1]. Among NCDs, the prevalence of type-2 diabetes mellitus (DM) and hypertension have been rising rapidly. Currently there are about 69 million people with diabetes, a figure that is projected to further increase to a staggering 124 million by 2040 [2]. The number of individuals with hypertension is projected to increase to 214 million by 2030 from 118 million in 2000 [3,4]. Furthermore, diabetes and hypertension are important risk factors for both the major forms of cardiovascular disease [CVD (coronary heart disease and stroke)], highly prevalent and attributable to nearly half of all the deaths from NCDs [4].

Despite the availability of proven and effective treatments, diabetes as well as hypertension detection and control rates are abysmally low in India with blood pressure control among those with diabetes being even more sub-optimal, with a huge gap between detection and adequate treatment [1,3,4]. Thus, there is great potential and opportunity to reduce the rising burden of diabetes and hypertension as well as the

1  
2  
3 associated vascular risk in India through concomitantly improving their detection,  
4  
5 prevention and control.  
6  
7  
8  
9

10 To address this huge gap in the prevention and management of both these conditions  
11 we are undertaking a 5-year initiative entitled “UDAY” (meaning dawn in *Sanskrit*) in  
12 epidemiologically transitioning communities, that aims to reduce the risk of diabetes and  
13 hypertension and concomitantly improve the management of either conditions by  
14 implementing a comprehensive community based innovative intervention program in the  
15 two geographically and culturally distinct study sites, Sonipat (Haryana, North India) and  
16 Visakhapatnam or Vizag (Andhra Pradesh, South India). This paper describes the  
17 design and methods of UDAY- A Comprehensive Diabetes and Hypertension  
18 Prevention and Management Program In India.  
19  
20  
21  
22  
23  
24  
25  
26  
27  
28  
29  
30  
31  
32

## 33 **Methods**

### 34 Study design

35 UDAY has a pre-post evaluation design with representative cross sectional surveys  
36 before (in year one at baseline, pre-intervention) and after the intervention (in year 5).  
37  
38 The main research question is: whether a multi-component, multi-level, cost-effective,  
39 comprehensive intervention program will improve the prevention, detection and optimal  
40 management of diabetes and hypertension in the two selected study sites. Ethical  
41 clearance for conduct of the study was obtained from the Institutional Ethics Committee  
42 (IEC) of the Public Health Foundation of India.  
43  
44  
45  
46  
47  
48  
49  
50  
51  
52

53 We selected a pre-post evaluation design due to the following reasons. We wanted to  
54 evaluate if multi-component interventions delivered at multiple levels in a  
55  
56  
57  
58  
59  
60

1  
2  
3 comprehensive manner can improve outcomes. Further, we also wanted to understand  
4 and examine the operational part of the program implementation to gain insights into  
5  
6 underpinning factors behind success or failure that can inform possible replication and  
7  
8 scale up in the future. The options for an implementation study of this nature with  
9  
10 process outcomes are either a pre-post design or quasi-experimental design or step  
11  
12 wedge design. We deemed a step wedge to be too complicated for this evaluation and  
13  
14 given that quasi experimental design would not have enough power to decipher real  
15  
16 differences, we chose a pre-post design. This was also aimed at cutting down costs.  
17  
18 At baseline, in year one, 5 surveys were conducted among the general population,  
19  
20 among patients, among healthcare providers including physicians and pharmacists and  
21  
22 in health facilities to guide intervention development and impact assessment. Similar  
23  
24 assessment is planned after the intervention, in year 5.  
25  
26  
27  
28  
29  
30  
31  
32

33 The specific objectives these assessments are to:

- 34  
35 1. Determine the prevalence, awareness, the knowledge levels about diabetes and  
36  
37 hypertension, the proportion treated and controlled among a representative  
38  
39 sample (n=12000) of adults aged  $\geq 30$  years in the selected study areas.  
40  
41 (Population survey)  
42  
43
- 44  
45 2. Determine the patient knowledge levels and self-management skills among a  
46  
47 convenience sample (n=400) of those diagnosed with diabetes and hypertension  
48  
49 in the selected study areas. (Patient survey)  
50  
51
- 52  
53 3. a) Determine healthcare providers' (physicians) knowledge and practices related  
54  
55 to diabetes and hypertension management among a convenience sample (n=50)  
56  
57 of healthcare providers' in the selected study areas.  
58  
59  
60

1  
2  
3 b) Determine pharmacists' knowledge related to diabetes and hypertension and  
4 dispensing practices among a convenience sample of pharmacists (n=350)  
5  
6  
7 (Provider survey)  
8  
9

10 4. Determine the level of access and potential barriers to diabetes and hypertension  
11 care provided by the public healthcare system in the selected study areas (n=50).  
12  
13 (Facility survey)  
14  
15

16  
17 5. Determine the cost-effectiveness of the intervention program in improving  
18 diabetes and hypertension treatment and management outcomes in the study  
19 areas. (Using population survey, GIS data and project implementation data)  
20  
21  
22  
23  
24  
25

### 26 Study sites

27  
28 We are undertaking this comprehensive diabetes prevention and management program  
29 in two epidemiologically transitioning areas located in Sonipat in Haryana and Vizag in  
30 Andhra Pradesh (Figure 1, supplementary file).  
31  
32  
33  
34  
35  
36  
37

### 38 **Figure 1: Study sites (insert here)**

39  
40  
41  
42 We defined the areas and their sub-areas using the following terminology:  
43

- 44 • Sites – a bounded geographic area within which we have defined distinct rural  
45 and urban sub-sites for the study. Each site has been defined such that it  
46 contains approximately 2,00,000 people. Sonipat and Vizag are each a site.  
47  
48
- 49 • Sub-sites – within each site, we have defined one rural and one urban sub-site  
50 for study. Each sub-site is geographically bounded, and contains a population of  
51  
52  
53  
54  
55  
56  
57  
58  
59  
60

approximately 1,00,000. Within Sonipat and Vizag, we have defined two sub-sites each (rural and urban).

- Total project – the total project is the summation of the two sites, including the four sub-sites (two sub-sites within each site). Therefore the total population under the study is approximately 4,00,000.

### Intervention program

We propose to implement a priority set of synergistic innovative ecosystem interventions (Figure 2, Table 1), with the overarching goal to prevent, detect, reduce the risk of diabetes and hypertension and to improve the treatment and management of individuals with either of the conditions in the study sites. We hypothesize (Figure 3) that education of the public on diabetes, hypertension and related risks will lead to increased self-referral and prevention, while education of the healthcare providers will promote opportunistic screening for diabetes, hypertension and related risks, and purposeful implementation of evidence based diagnostic (to screen, stratify by risk) and management guidelines (to initiate appropriate therapy).

### **Figure 2: Priority interventions in UDAY (insert here)**

**Table 1: Innovations in UDAY**

| <b>Intervention domain</b>               | <b>Approach</b>                                 | <b>Target</b>        |
|------------------------------------------|-------------------------------------------------|----------------------|
| Prevention, early detection and referral | Culturally tailored health promotion, screening | 400,000 population   |
| Capacity building, task                  | CME, short trainings,                           | Healthcare providers |

|                                                                           |                               |                  |
|---------------------------------------------------------------------------|-------------------------------|------------------|
| shifting of healthcare providers                                          | distance learning, QIP        |                  |
| Early diagnosis and prevention of complications                           | Registry                      | 10,000 patients  |
| m-health system                                                           | Electronic data system +DSS   | Adult population |
| Electronic data capture                                                   | Tablet based surveys          | 12,000           |
| Spatial and built environment assessment                                  | GIS mapping                   | All study areas  |
| Improved access to medicines by social marketing initiatives              | Improving quality of services | 300 pharmacists  |
| Culturally tailored patient education and networks for enabling self-care | Utilizing health workers      | Patients         |

**Figure 3: Intervention framework (insert here)**

Following the baseline assessments a comprehensive intervention program is being currently implemented. The intervention components includes:

1. tailored health promotion using social marketing approaches for increasing public awareness and promoting population risk factor modification and reduction;
2. community based screening of all adults aged  $\geq 30$  years for identifying those at high risk of diabetes and/or hypertension or with disease to link to the healthcare system leveraging task-sharing approaches utilizing technology enabled health workers;
3. patient education using technology enabled health workers,
4. healthcare provider training on evidence based management guidelines,
5. implementation of a quality improvement program and diabetes registry and;



- 1  
2  
3 6. advocacy with governments and other stakeholders to improve access to  
4  
5 healthcare.  
6  
7  
8  
9

10 It is expected that the comprehensive interventions will increase over baseline the levels  
11 of: public awareness and knowledge about diabetes and hypertension; those aware,  
12 diagnosed, treated and controlled to recommended targets; the use of guideline based  
13 management by providers. Detailed outcome assessment metrics is provided in table 2.  
14  
15 This is anticipated to improve health outcomes and access to healthcare for people  
16 living with diabetes and hypertension in India as well as provide a model of healthcare  
17 which is low-cost, community based and context relevant in a milieu of rapid rise in  
18 these chronic conditions.  
19  
20  
21  
22  
23  
24  
25  
26  
27  
28  
29  
30  
31  
32  
33  
34

35 **Table 2: Assessment of intervention outcomes**  
36  
37

| Indicator           | Target Population                  | Metric                                                                                                                             | Evaluation Methodology                          |
|---------------------|------------------------------------|------------------------------------------------------------------------------------------------------------------------------------|-------------------------------------------------|
| 1. Patient outcomes | Diabetes and hypertension patients | % implementing lifestyle change (meet the recommended levels of physical activity, and intend to and/or implement dietary changes) | Baseline and endline surveys, diabetes registry |
|                     |                                    | % engaging in self-monitoring/testing                                                                                              | Baseline and endline surveys, diabetes registry |
|                     |                                    | % increase in correct self-management practices                                                                                    | Baseline and endline surveys, diabetes registry |
|                     |                                    | % increase in knowledge on diabetes and hypertension                                                                               | Baseline and endline surveys, diabetes registry |

|                                                            |                                  |                                                                                                                                     |                                                                                |
|------------------------------------------------------------|----------------------------------|-------------------------------------------------------------------------------------------------------------------------------------|--------------------------------------------------------------------------------|
|                                                            |                                  | % of patients on treatment, whose diabetes, hypertension is successfully controlled, i.e., HbA1C $\leq$ 7% / BP $\leq$ 130/80 mm Hg | Baseline and endline surveys, diabetes registry                                |
| 2. Awareness and knowledge about diabetes and hypertension | General population               | % increase in knowledge of diabetes, hypertension and their risk factors                                                            | Baseline and endline surveys                                                   |
|                                                            |                                  | % increase in detection rate and in seeking healthcare                                                                              | Baseline and endline surveys, screening program                                |
|                                                            |                                  | % implementing lifestyle change (meet the recommended levels of physical activity, and intend to and/or implement dietary changes)  | Baseline and endline surveys, screening program                                |
|                                                            |                                  | % exposed to health promotion campaign                                                                                              | Baseline and endline surveys, screening program                                |
| 3. Provider knowledge and practices                        | Physicians, other health workers | # who participate in training programs                                                                                              | Training participation data                                                    |
|                                                            |                                  | % increase in knowledge related to diabetes and hypertension management                                                             | Baseline and endline surveys of providers, diabetes registry                   |
|                                                            |                                  | % increase in practices related to diabetes and hypertension management and providing lifestyle advice                              | Baseline and endline surveys of providers, diabetes registry                   |
|                                                            | Pharmacists                      | % of pharmacists who identify people at risk of and with diabetes, hypertension                                                     | Baseline and endline surveys of providers                                      |
|                                                            |                                  | % increase in pharmacists dispensing and filling prescriptions correctly                                                            | Baseline and endline surveys of providers, diabetes registry                   |
| 4. Program cost-effectiveness                              | Diabetes patients                | Cost per diabetic patient treated to recommended target                                                                             | Baseline and endline surveys of patients, program cost data, diabetes registry |
|                                                            |                                  | % reduction in out of pocket expenditure                                                                                            | Baseline and endline surveys of patients, diabetes registry                    |
|                                                            | General population               | Cost per diabetes case identified                                                                                                   | Surveys, screening program, program cost data                                  |

|                        |                   |                                                                                      |                                                                              |
|------------------------|-------------------|--------------------------------------------------------------------------------------|------------------------------------------------------------------------------|
| 5. Access to treatment | Healthcare system | Improvements in access to and availability of medications                            | Baseline and endline surveys of patients, facility survey, diabetes registry |
|                        |                   | % increase in the proportion patients who report that medicines are easily available | Baseline and endline surveys of patients, facility survey, diabetes registry |
|                        |                   | % reduction in stock outs of medicines                                               | Baseline and endline surveys of patients, facility survey, diabetes registry |
|                        |                   | Adherence to IPHS guidelines on drugs, services                                      | Facility survey, diabetes registry                                           |

### Intervention development

We used evidence based interventions and leveraged the results from the baseline surveys (population, patient, facility and providers) to develop and refine the interventions, which were subsequently piloted. For example, from population survey we found that there were differences in the awareness of risk factors for developing diabetes/hypertension across rural/urban areas and the two study sites in North and South India. Therefore, taking this into cognizance, we designed the tailored health promotion program and messages to be delivered by trained health workers to increase awareness about the risk factors. Facility and providers' surveys helped us to design the training programs for training healthcare providers as well as to conduct advocacy to improve access to the health system. Similarly, findings from the patients' survey helped us to focus the training of health workers on building self-management skills of people with diabetes/hypertension and for developing patient networks.

### Sample for the population survey

We based our sample size calculation on the prevalence of diabetes, which has a lower prevalence than hypertension, in previously reported studies in India. Anticipating a response rate of 85 % with a design effect factor of 1.5 (to account for cluster sampling, and a confidence level of 1.96, the sample size estimates were generated for males and females in three age strata (30-49, 50-69, 69 and above) in each setting (urban, rural). About 2968 subjects was estimated to be required per urban sub-site (Sonipat and Vizag) and 2942 subjects per rural sub-site (Sonipat and Vizag). The total estimated sample was 11820, which was increased to 12000 to obtain equal samples in both urban and rural areas. Sample weights were generated for estimating the prevalence of diabetes, hypertension and related cardiometabolic risk factors at the district level.

### Survey sampling and participant selection

#### Population survey

Two representative population based cross sectional surveys with independent samples and identical methodologies at baseline and at the end of intervention will be conducted, that will provide estimates of the burden and changes in the prevalence of diabetes, hypertension, and related cardiometabolic risk factors. In addition, those recruited for the first survey at baseline (which has been completed), will be followed up as a cohort to estimate the incidence of new cardio-metabolic (CMD) risk factors, disease, healthcare utilization, diabetes and hypertension related morbidity and mortality.

1  
2  
3 The first population survey (baseline survey) was done among a representative sample  
4 of adults aged  $\geq 30$  years residing in the selected study areas of Sonipat and Vizag.

5  
6  
7 Inclusion criteria – a) adults aged  $\geq 30$  years residing in the sampled urban and rural  
8 areas of Sonipat and Vizag respectively. b) willing to participate and provide informed  
9 consent.  
10  
11  
12

13  
14 We excluded individuals who were unwilling to provide informed consent and those with  
15 serious chronic illnesses [such as that of the liver (cirrhosis), kidneys (renal failure) or  
16 malignancies], pregnant women.  
17  
18  
19  
20  
21  
22

23  
24 For the baseline survey, a multistage random sampling technique was deployed to  
25 obtain a representative sample of adults aged  $\geq 30$  years, using data from the most  
26 recent census of 2011. In addition, a manual enumeration and mapping of all  
27 households and structures was conducted in all the study areas [all census enumeration  
28 blocks (CEBs) in urban areas and villages in rural], to identify households and  
29 structures constructed since the last census (Table 3). CEBs are considered as the  
30 primary sampling unit in urban areas and villages in the rural areas respectively. On  
31 average, about 100-125 households with a population of 650-700 persons would  
32 generally constitute a CEB. This enabled a complete sampling frame for the selection of  
33 households for the survey and thus provided an equal chance of selection to each  
34 household. Besides, it also helped identify potential recipients of the intervention  
35 program (i.e., adults aged  $\geq 30$  years) in the study sites.  
36  
37  
38  
39  
40  
41  
42  
43  
44  
45  
46  
47  
48  
49  
50

51 In each sub-site, 85 clusters were randomly selected (urban Sonipat: 85/200 CEBs,  
52 urban Vizag: 85/207 CEBs and rural Sonipat: 85/168 clusters, rural Vizag: 85/147  
53 clusters) according to probability proportional to size (Figure 4). In rural sub-sites, bigger  
54  
55  
56  
57  
58  
59  
60

villages were divided into clusters with 75 to 300 households. From each cluster in the urban and rural sub-sites, 18 to 25 households were randomly selected and 1 eligible male and female were selected randomly within each household using Kish table. In Sonipat district, 3675 households participated in baseline survey (rural: 1881, urban: 1794) with total being 6208 participants (rural: 3104, urban: 3104). In Vizag district, 3589 households (rural: 1817, urban: 1772) participated in the baseline survey with total being 6035 participants (rural: 3069, urban: 2966). Thus, we had 12000 individuals from both urban and rural areas of North and South India.

**Table 3: Manual enumeration of study areas**

| Study site             | Structures | Households | Population ≥30 years | Total population (census 2011) |
|------------------------|------------|------------|----------------------|--------------------------------|
| Sonipat urban sub-site | 24408      | 20406      | 41981                | 102292                         |
| Sonipat rural sub-site | 28813      | 17283      | 40850                | 100935                         |
| Vizag urban sub-site   | 16888      | 39504      | 70735                | 153721                         |
| Vizag rural sub-site   | 33799      | 30817      | 59540                | 121209                         |

**Figure 4: Sample selection for the baseline survey (insert here)**

\*N=total, n=number selected

\*\*CEB=Census Enumeration Block

\*\*\*Cluster = In urban sub-site clusters comprise CEBs, in rural sub-site bigger villages were split into 2 or 3 clusters with sizes of 75-300 households.

### Data collection for the population survey

For the baseline survey, trained health workers visited the selected participants at their homes. Written informed consent was sought and obtained from the selected individuals prior to data collection and a unique identification number was assigned. For each participant, data collection comprised an interviewer administered questionnaire, a brief physical examination (height, weight, waist circumference, hip circumference, blood pressure, body fat percentage), blood and urine collection as detailed below.

Information on demographics, socio-economic characteristics, behavioral risk factors (tobacco use, alcohol use, diet and physical inactivity), family history of various NCDs, female reproductive history, general awareness about diabetes and hypertension, risk factors, prevention, symptoms and diagnosis, complications, treatment and management, medical history of NCDs [diabetes, hypertension, coronary artery disease (CAD), myocardial infarction (MI), stroke, heart failure, chronic kidney disease (CKD), peripheral vascular disease (PVD), chronic obstructive pulmonary disease (COPD), asthma], quality of life, mental health, social support, cost of healthcare and healthcare utilization was collected using a tablet based application (Table 4).

Body measurements such as height, weight, waist and hip circumferences, blood pressure and body fat measurement by bio impedance using TANITA were also obtained using standardized equipment.

Bio-samples (fasting blood and morning urine) were collected for the laboratory estimation of fasting plasma glucose, glycated hemoglobin (HbA1c), lipids, serum creatinine, urea, urine microalbumin and urine creatinine. We have also stored the bio samples for future analysis of emerging biomarkers and genetics.

**Table 4: Summary of indicators, measures, methods and instruments for baseline survey**

| Indicators                                      | Measures                                                                                                 | Methods                                                 | Instruments                                                                                                                                                                                                                                                      |
|-------------------------------------------------|----------------------------------------------------------------------------------------------------------|---------------------------------------------------------|------------------------------------------------------------------------------------------------------------------------------------------------------------------------------------------------------------------------------------------------------------------|
| Demographics and socio-economic characteristics | Age, sex, marital status, religion, education, income, occupation, contact details, and household assets | Questionnaires                                          | Centre for Cardio-metabolic Risk Reduction in South Asia(CARRS) Surveillance Study [5]<br>Establishment of Sentinel Surveillance System for CVD in Indian Industrial Populations (Sentinel Surveillance Study) [6]<br>National Family Health Survey, 2005-06 [7] |
| Behavioral risk factors                         | Tobacco use<br>Alcohol use<br><br>Physical activity<br><br>Dietary habits                                | Questionnaire<br><br>Questionnaire<br><br>Questionnaire | CARRS, Sentinel Surveillance Study<br><br>Global Physical Activity Questionnaire (GPAQ-2) [8]<br><br>CARRS, INTERHEART Study[9]                                                                                                                                  |
| Family history                                  | Prevalence of cardiometabolic diseases (CMDs) among family members related to participants, mortality    | Questionnaire                                           | CARRS                                                                                                                                                                                                                                                            |
| Female                                          | Menarche/                                                                                                | Questionnaire                                           | CARRS                                                                                                                                                                                                                                                            |



|                                            |                                                                                                                                              |                                                                              |                                                                                                                                                                                                                            |
|--------------------------------------------|----------------------------------------------------------------------------------------------------------------------------------------------|------------------------------------------------------------------------------|----------------------------------------------------------------------------------------------------------------------------------------------------------------------------------------------------------------------------|
| reproductive history                       | gestational history, menopause (surgical / physiological / whether on hormone replacement therapy) / contraception                           |                                                                              |                                                                                                                                                                                                                            |
| Awareness and knowledge                    | General awareness about diabetes and hypertension, risk factors, prevention, symptoms and diagnosis, complications, treatment and management | Questionnaire                                                                | CARRS                                                                                                                                                                                                                      |
| Physiological and biochemical risk factors | Hypertension                                                                                                                                 | Blood pressure measurements                                                  | Standardized method (American Heart Association) and validated instrument (certified by British Hypertensive Society and Association for the Advancement of Medical Instrumentation)<br>Standardized across both the sites |
|                                            | Diabetes                                                                                                                                     | Laboratory estimation of fasting plasma glucose, glycated hemoglobin (HbA1c) | Standardized across both the sites                                                                                                                                                                                         |
|                                            | Dyslipidemia                                                                                                                                 | Laboratory estimation of serum total cholesterol, low                        | Standardized across both the                                                                                                                                                                                               |

|                                                                           |                                                                                                                           |                                                                                                                                                                                                                     |                                                                                                                                                                                  |
|---------------------------------------------------------------------------|---------------------------------------------------------------------------------------------------------------------------|---------------------------------------------------------------------------------------------------------------------------------------------------------------------------------------------------------------------|----------------------------------------------------------------------------------------------------------------------------------------------------------------------------------|
|                                                                           | Obesity                                                                                                                   | <p>density lipoprotein cholesterol, very low density lipoprotein cholesterol, high density lipoprotein cholesterol, triglycerides</p> <p>Anthropometry (height, weight, waist and hip circumferences, body fat)</p> | <p>sites</p> <p>Standard procedures based on National Health And Nutrition Examination Survey-III with instruments used in epidemiological studies on South Asian population</p> |
| Medical history                                                           | <p>Chronic kidney disease</p> <p>Stroke, myocardial infraction, Congestive heart failure, Chronic stable angina</p>       | <p>Serum creatinine, urea, urine microalbumin and urine creatinine</p> <p>Questionnaires including medical history</p>                                                                                              | <p>Standardized across both the sites</p> <p>Rose Angina, CARRS</p>                                                                                                              |
| Treatment history, health services, quality of care and health care costs | <p>Awareness and risk factor control</p> <p>Access to health care services, utilization of services, health insurance</p> | Questionnaire                                                                                                                                                                                                       | CARRS                                                                                                                                                                            |

|                                |                                                                                                               |               |                                                                         |
|--------------------------------|---------------------------------------------------------------------------------------------------------------|---------------|-------------------------------------------------------------------------|
|                                | coverage, costs of treating CMDs and their risk factors                                                       |               |                                                                         |
| Prevalence                     | COPD and asthma                                                                                               | Questionnaire | NHANES III and present standards of the American Thoracic Society (ATS) |
| Health related Quality of Life | Mobility, self-care, usual activities, pain/discomfort, anxiety/depression (related to CMDs and risk factors) | Questionnaire | European Quality of Life 5 Dimensions questionnaire (EQ-5D-3L) [10]     |
| Mental health                  | Depression                                                                                                    | Questionnaire | Modified from Patient Health Questionnaire 9 (PHQ-12) [11]              |
| Social well-being              | Social support                                                                                                | Questionnaire | Developed for UDAY                                                      |

### Data collection for the patient survey

Trained research staff visited health facilities located in the aforementioned selected study areas and approached patients attending outpatient section of the health facilities and identified those with the diagnosis of diabetes and/or hypertension based on their prescription note for participating in the study. Written informed consent was sought and obtained from the individuals prior to data collection and data collection comprised an interviewer administered questionnaire (Table 5).

The patient survey was done among a convenience sample of 400 patients having diabetes and/or hypertension attending health facilities and residing in the selected study areas of Sonipat and Vizag.

Inclusion criteria: We included patients with diabetes and or hypertension residing/attending health facilities in the sampled urban and rural areas of Sonipat and Vizag respectively and were willing to participate and provide informed consent.

Exclusion criteria: We excluded those unwilling to provide informed consent.

**Table 5: Summary of indicators, measures, methods and instruments for the patient survey**

| Indicators                                           | Measures                                                                                                                      | Methods        | Instruments                           |
|------------------------------------------------------|-------------------------------------------------------------------------------------------------------------------------------|----------------|---------------------------------------|
| Demographics and socio-economic characteristics      | Age, sex, education, income, occupation, contact details                                                                      | Questionnaires | CARRS<br>Sentinel Surveillance Study  |
| Behavioral risk factors                              | Tobacco use<br>Alcohol use                                                                                                    | Questionnaire  | CARRS, Sentinel Surveillance Study    |
| Awareness and knowledge of diabetes and hypertension | Awareness of risk factors, symptoms and diagnosis, cut-off levels for diagnosis, complications, treatment and management      | Questionnaire  | Developed for UDAY                    |
| Diabetes and hypertension related medical history    | Diagnosis, health care utilization, control, self-management practices, complications, comorbidities, and treatment adherence | Questionnaire  | Developed for UDAY                    |
| Health related Quality of Life                       | Mobility, self-care, usual activities,                                                                                        | Questionnaire  | European Quality of Life 5 Dimensions |

|                        |                                                                        |               |                                                       |
|------------------------|------------------------------------------------------------------------|---------------|-------------------------------------------------------|
|                        | pain/discomfort, anxiety/depression (related to CMDs and risk factors) |               | questionnaire (EQ-5D-3L)                              |
| Mental health          | Depression                                                             | Questionnaire | Modified from Patient Health Questionnaire 9 (PHQ-12) |
| Social well-being      | Social support                                                         | Questionnaire | Developed for UDAY                                    |
| Healthcare utilization | Hospital visits in the past 12 months and health care expenditure      | Questionnaire | CARRS                                                 |

#### Data collection for the provider surveys

Trained research staff visited health facilities located in the aforementioned selected study areas and approached healthcare providers (physicians and pharmacists). Written informed consent was sought and obtained from the individuals prior to data collection and data collection comprised an interviewer administered questionnaire (Table 6).

The physician survey was done among a convenience sample of 50 physicians working in the health facilities located in the selected study areas of Sonipat and Vizag.

Inclusion criteria: We included physicians working in health facilities located in the sampled urban and rural areas of Sonipat and Vizag respectively and were willing to participate and provide informed consent.

Exclusion criteria: Those unwilling to provide informed consent were excluded.

The pharmacist survey was conducted among 350 pharmacists by trained research staff in the aforementioned selected study areas. Written informed consent was sought

and obtained from the individuals prior to data collection and data collection comprised an interviewer administered questionnaire.

Inclusion criteria: We included pharmacists who were located in the sampled urban and rural areas of Sonipat and Vizag respectively, dispensing medicines for diabetes and hypertension, were willing to participate and provide informed consent.

Exclusion criteria: Those not dispensing medicines for diabetes and hypertension and unwilling to provide informed consent were excluded.

**Table 6: Summary of indicators, measures, methods and instruments for the provider survey (physicians)**

| Indicators                                                                                               | Measures                                                                                                      | Methods       | Instruments        |
|----------------------------------------------------------------------------------------------------------|---------------------------------------------------------------------------------------------------------------|---------------|--------------------|
| Socio-demographic details                                                                                | Age, gender, qualification, years of practice, patient load, training in diabetes and hypertension management | Questionnaire | Developed for UDAY |
| Knowledge and practice pertaining to diabetes and hypertension diagnosis and evaluation of complications | Signs and symptoms, diagnosis and cut-off levels for diagnosis, evaluation for complications                  | Questionnaire | Developed for UDAY |
| Treatment practices for diabetes and hypertension                                                        | Lifestyle modifications, prevention and management of                                                         | Questionnaire | Developed for UDAY |

|  |                                                                   |  |  |
|--|-------------------------------------------------------------------|--|--|
|  | complications,<br>names of<br>medicines<br>prescribed<br>commonly |  |  |
|--|-------------------------------------------------------------------|--|--|

### Data collection for the health facility survey

Permission was sought and obtained from respective district medical/health officers prior to data collection and data collection comprised an interviewer administered questionnaire (Table 7). Trained research staff visited public healthcare facilities located in the aforementioned selected study areas and approached the person/ medical officer in charge.

The facility survey was done in 50 public healthcare facilities (sub-centres, primary and community health centres, taluk/district/tertiary hospitals) situated in the selected study areas of Sonipat and Vizag.

**Table 7: Summary of indicators, measures, methods and instruments for the health facility survey**

| Indicators          | Measures                                                                                                                                                                                                       | Methods       | Instruments                                                                                             |
|---------------------|----------------------------------------------------------------------------------------------------------------------------------------------------------------------------------------------------------------|---------------|---------------------------------------------------------------------------------------------------------|
| Coverage statistics | Types of services offered, number of hours and days services provided per week, population covered, average daily outpatient department (OPD) attendance, number of beds available, status of National program | Questionnaire | Adapted from Service Availability and Readiness Assessment tool (SARA) of the World Health Organization |

|                             |                                                                                                                                                                                                                                        |                          |                                                              |
|-----------------------------|----------------------------------------------------------------------------------------------------------------------------------------------------------------------------------------------------------------------------------------|--------------------------|--------------------------------------------------------------|
|                             | for control and prevention of diabetes, cardiovascular disease and stroke (NPCDCS) implementation                                                                                                                                      |                          |                                                              |
| Recommended manpower list   | Numbers working at District Hospitals, Community Health Centres, Primary Health Centres and Sub-centres against recommended numbers and reasons for lack of recommended personal. Additional manpower required for NCDs                | Checklist, questionnaire | Adapted from Indian Public Health Standards, (IPHS) and SARA |
| Recommended medication list | Availability of medicines at District Hospitals, Community Health Centres, Primary Health Centres and Sub-centres against recommended medicines and reasons for lack for recommended medicines. Additional medicines required for NCDs | Checklist, questionnaire | Adapted from IPHS and SARA                                   |
| Recommended equipment list  | Numbers of equipment available at District Hospitals, Community Health Centres, Primary Health Centres and Sub-centres against recommended                                                                                             | Checklist, questionnaire | Adapted from IPHS and SARA                                   |



|                                                                          |                                                                                                                                                                                                                                                                     |                          |                            |
|--------------------------------------------------------------------------|---------------------------------------------------------------------------------------------------------------------------------------------------------------------------------------------------------------------------------------------------------------------|--------------------------|----------------------------|
|                                                                          | equipment and their functional status.<br>Additional equipment required for NCDs                                                                                                                                                                                    |                          |                            |
| Recommended investigative services list                                  | Investigative services available at District Hospitals, Community Health Centres, Primary Health Centres and Sub-centres against recommended services and reasons for their unavailability.<br>Additional investigative services required for NCDs                  | Checklist, questionnaire | Adapted from IPHS and SARA |
| Recommended activities list                                              | Frequency of recommended activities conducted and methods of conducting at District Hospitals, Community Health Centres, Primary Health Centres and Sub-centres for current diagnosis, treatment and health promotion.<br>Reasons for not conducting the activities | Checklist, questionnaire | Adapted from IPHS and SARA |
| Availability of national guidelines and training of healthcare providers | Availability of national guidelines for diagnosis and management of diabetes, hypertension and CVD and training of healthcare providers in the                                                                                                                      | Questionnaire            | Adapted from IPHS and SARA |

|  |                                                                |  |  |
|--|----------------------------------------------------------------|--|--|
|  | facility to diagnose and manage diabetes, hypertension and CVD |  |  |
|--|----------------------------------------------------------------|--|--|

### Bio-sample collection and storage

Blood samples (in fasting state) were collected in plain, fluoride and EDTA vacutainers (Becton & Dickinson, USA) by trained phlebotomists in households or in camps arranged close to the households. Samples for estimation for blood glucose were kept in ice and transferred to laboratories within 2 hours of sample collection and immediately centrifuged. Samples were centrifuged at 2500 rpm for 15 minutes and serum / plasma were transferred into the cryo-vials which were stored in 20°C immediately. Buffy coat from EDTA vacutainers were separated and stored into cryo-vials for DNA extraction. Red blood cells were washed thrice with normal saline and were stored for analysis of fatty acids in future. First early morning voided urine was collected from the participants and has been stored in deep freezer for future analysis of metabolites. All these samples were transported to the biochemistry laboratory at the Public Health Foundation of India (PHFI) in dry-ice on the day of collection from Sonipat and Vizag, where they were stored at -80°C.

All clinical chemistry parameters were analyzed on autoanalyzer Cobas 311 using reagents from Roche Diagnostics, Switzerland. Glucose was estimated using Hexokinase method, cholesterol by enzymatic cholesterol oxidase method, triglycerides by GPO-PAP method & HDL and LDL by direct method, AST & ALT was estimated according to IFCC without pyridoxal phosphate, bilirubin total by Diazonium ion method,

1  
2  
3 bilirubin direct by Diazo with sulphanic acid method, urea by kinetic method, creatinine  
4  
5 by Jaffe's method, and urinary microalbumin using immuno turbidimetric method.  
6  
7 HbA1c was assayed by hplc method using reagents from Bio-Rad Laboratories,  
8  
9 Hercules, CA.  
10

11  
12 Two levels of internal controls were run with every batch of samples. The intra assay  
13  
14 and inter assay coefficient of variation for all the parameters were <3% and <5 %  
15  
16 respectively.  
17

18  
19 The biochemistry laboratory is part of External Quality Assurance program from RIQAS  
20  
21 for clinical chemistry parameters and HbA1c assay.  
22  
23  
24  
25

### 26 **Evaluation of cost-effectiveness**

27  
28 This will be evaluated by assessing the costs and benefits of the multi-component,  
29  
30 multi-level comprehensive interventions in improving diabetes related health outcomes.  
31  
32 Data on healthcare utilization and costs, as well as that of out of pocket expenditure will  
33  
34 be collected in the baseline and end line surveys. In addition, data on direct costs  
35  
36 including the cost of personnel, provider training, medications, lab tests and supplies,  
37  
38 screening, outpatient visits, and costs related to the social marketing campaign will be  
39  
40 obtained during the implementation process. The total costs entailed to identify a person  
41  
42 with diabetes as well as to appropriately treat that person to recommended targets  
43  
44 based on guidelines will be measured. In addition, we will model the costs accrued from  
45  
46 the use of drugs and other related interventions, based on results of other such  
47  
48 comprehensive programs and do a comparison to assess effectiveness. Based on the  
49  
50 aforesaid indicators, we will develop a comprehensive cost-effectiveness model to  
51  
52 assess the overall program effectiveness.  
53  
54  
55  
56  
57  
58  
59  
60

Geographical Information System (GIS) based mapping of study households and neighborhood built environment

All households as well as the study areas, including various points of interest as indicated below were geocoded using GIS mapping. This will be used to comprehensively assess the built environment and its impact on diabetes hypertension and risk factors. GIS based techniques will be employed to study the association between built environment (BE) features and diabetes, hypertension and related risk factors.

Specially trained field staff visited all participant households and used handheld Garmin™ GPS receivers to capture GPS locations of the households. The captured GPS coordinates were verified using Google Earth to see if the locations matched the actual locations.

Table 8 below shows the built environment features from the study areas that were located and mapped.

**Table 8: Characteristics of the built environment in study sites**

| Environment features  | Points of interest                                             | N   | Sonipat | Vizag |
|-----------------------|----------------------------------------------------------------|-----|---------|-------|
| Healthcare facilities | Government hospitals                                           | 64  | 36      | 28    |
|                       | Private hospitals & clinics                                    | 228 | 147     | 81    |
|                       | Registered medical practitioners and unqualified practitioners | 220 | 195     | 25    |
|                       | Other health professionals                                     | 120 | 115     | 3     |
|                       | Pharmacies                                                     | 337 | 224     | 113   |

|                         |                                             |     |     |     |
|-------------------------|---------------------------------------------|-----|-----|-----|
|                         | Medical laboratories                        | 46  | 30  | 16  |
| Food outlets            | Hotels                                      | 162 | 4   | 161 |
|                         | Restaurants                                 | 33  | 10  | 23  |
|                         | Small eateries                              | 97  | 40  | 57  |
|                         | Provision / department stores               | 313 | 196 | 117 |
|                         | Fruit / vegetable / juice outlets           | 254 | 36  | 218 |
|                         | Meat / fish shops                           | 128 | 24  | 104 |
|                         | Public distribution system<br>(ration)shops | 52  |     | 52  |
|                         | Milk outlets                                | 126 | 344 | 122 |
|                         | Bakeries/ sweet shops                       | 106 | 56  | 50  |
| Tobacco outlets         | Pan shop                                    | 713 | 17  | 696 |
| Alcohol outlets         | Authorized government outlets               | 45  | 31  | 14  |
|                         | Unauthorized alcohol outlets                | 100 |     | 100 |
| Recreational facilities | Parks                                       | 91  | 62  | 29  |
|                         | Walking tracks                              | 6   |     | 6   |
|                         | Play grounds                                | 50  | 43  | 7   |
|                         | Fitness / yoga centers                      | 10  | 6   | 4   |
| Other                   | Anganwadis, schools, temples                | 633 | 124 | 509 |
|                         | etc.                                        |     |     |     |

Household GPS locations and neighborhood BE features were integrated with participant data collected as part of the baseline data collection. An overview of the GIS mapping is provided in Figure 5. Area boundaries were obtained from government

1  
2  
3 records and digitized. All spatial data was integrated into a spatial database and  
4  
5 ArcGIS™ software will be used to carry out following spatial analysis methods.  
6  
7

- 8 • Distance calculations: distance between participant households and features of  
9 interest such as health care facilities, food and alcohol outlets, parks etc. and  
10 their association between CMD and risk factors.  
11  
12
- 13 • Spatial aggregation: Aggregation of features such as number of food outlets,  
14 parks etc. in the neighbourhood and relationship with CMD and risk factors.  
15  
16
- 17 • Clustering: Identify clustering of CMD and risk factors (hotspots) and determine if  
18 disease clusters are of sufficient geographic size and concentration to have not  
19 occurred by chance.  
20  
21
- 22 • Spatial smoothing and interpolation: Used to derive a spatial surface from  
23 sampled data points (filling in where data are unobserved) or to smooth across  
24 polygons (aggregate data) to create more robust estimates.  
25  
26
- 27 • Spatial regression: Use of Spatial regression methods such as Geographically  
28 weighted regression ( GWR) to further understand the relationship between built  
29 environment and CMD risk factors as standard statistical regression models,  
30 which assume independence of the observations, are not appropriate for  
31 analysing spatially dependent data.  
32  
33  
34  
35  
36  
37  
38  
39  
40  
41  
42  
43  
44

45 **Figure 5: GIS mapping overview (insert here)**  
46  
47  
48

49 Data management  
50

51 Data were collected in electronic format using customized android based software on a tablet  
52 platform and uploaded to server on a real time basis (Figure 6). For ensuring quality control, all  
53 validation, range and logical checks were in-built in the software. Error reports were generated  
54 bi-weekly and sent to the study sites for rectification. Errors were checked against completion of  
55  
56  
57  
58  
59  
60

1  
2  
3 the questionnaire, identifiers and adherence to the sampling strategy of interviews (only one  
4 man and one woman from single household).  
5

6  
7 Further, site research teams identified any other issues and reported to centralized team for the  
8 corrections. Data correction took place concomitantly with the conduct of the baseline survey.  
9  
10 Similarly, bio-sample reports were matched with participant questionnaires and the final data  
11 was locked after all matching, and rectification of errors.  
12  
13  
14  
15

### 16 **Figure 6: Data collection and management pathway (insert here)**

17

#### 18 Analysis plan

19

20  
21 Data were entered into a database designed specifically for the project, housed at PHFI  
22 and accessible only to investigators and designated study staff. Data will be analysed  
23  
24 using Stata/SE version 10.1 for windows software. Descriptive statistics will be done  
25  
26 and the data expressed as frequencies and percentages for categorical variables and  
27  
28 means and standard deviations for normally distributed continuous variables or inter-  
29  
30 quartile ranges otherwise. Differences between gender groups, age groups, socio-  
31  
32 economic groups, study sites, time periods and individual hypotheses will be tested  
33  
34 using appropriate analytical statistical tests (Chi-square tests for categorical variables, t-  
35  
36 tests continuous variables, multiple linear regression for continuous variables, and  
37  
38 multiple logistic regression for categorical variables). Stratified analysis will be done to  
39  
40 assess for potential confounding and effect modification by other variables. A p-value of  
41  
42 < 0.05 will be considered to indicate statistical significance. Multi-level modelling will be  
43  
44 undertaken by clusters and households as potential levels.  
45  
46  
47  
48  
49  
50  
51  
52  
53

#### 54 **Discussion**

55  
56  
57  
58  
59  
60

1  
2  
3 UDAY is one of the largest community based intervention studies established in India to  
4  
5 implement and evaluate a multi-component, multi-level, cost-effective, comprehensive  
6  
7 intervention program to concomitantly improve the prevention, detection and optimal  
8  
9 management of diabetes and hypertension, which together constitute the leading NCDs  
10  
11 in India. Their high and rising burden coupled with huge healthcare costs underlines the  
12  
13 need for cost-effective community based approaches supplemented by measures to  
14  
15 strengthen the health system to address both these NCDs effectively as envisaged in  
16  
17 UDAY.  
18  
19

20  
21 Most of the evidence on community interventions for chronic NCDs are from developed  
22  
23 countries [12-13]. In the last two decades some evidence has emerged from developing  
24  
25 countries as well but not quite commensurate to the disproportionate burden borne by  
26  
27 them (80% NCD mortality) [14-15]. This is due to several reasons including resources to  
28  
29 conduct such large projects as well as the technical capacity [14,15]. However,  
30  
31 available information indicates that results are likely better in developing countries (e.g.  
32  
33 Isfahan Healthy Heart Program in Iran, diabetes prevention programs in China and  
34  
35 India) [14-16]. We have taken into account findings of such prior research and  
36  
37 attempted to address the reported gaps by adding relevant elements to the design of  
38  
39 our study. For instance, most such intervention programs have entailed community  
40  
41 based interventions (largely targeting lifestyle modification) but have not had active  
42  
43 healthcare system and advocacy interventions as proposed in our study. In addition,  
44  
45 many of the diabetes prevention programs have targeted high risk groups and not the  
46  
47 general free living population as envisaged in this program. Further, we have used  
48  
49 several innovations (see table 1) including task shifting/sharing of care to non-physician  
50  
51 health workers by the extensively leveraging low-cost m-health technology to enable  
52  
53  
54  
55  
56  
57  
58  
59  
60



1  
2  
3 and empower them to screen and deliver interventions as well as physicians to treat  
4 patients as per evidence based algorithms. We have also used GIS mapping to  
5  
6 characterize the sites, built environment, healthcare facilities and providers to examine  
7  
8 the influence of built environment on diabetes/hypertension and their risks factors as  
9  
10 well as care pathways that patients undertake, in order to deliver interventions in a more  
11  
12 focused way. In addition, we have built in extensive stakeholder and community  
13  
14 engagement in the study implementation which should aid in improving acceptability  
15  
16 and buy in for the intervention program.  
17  
18  
19

20  
21 Further, the community based cohorts established will not only facilitate tracking of the  
22  
23 trends in risk factors and diseases in rapidly transitioning populations in India, but also  
24  
25 serve as well characterized population platforms for embedding and evaluating new  
26  
27 research questions of public health relevance in combating the rise of NCDs.  
28  
29

30  
31 Notably, a unique strength of UDAY besides occurring in a developing country setting  
32  
33 where there are limited community based projects, in comparison to various other  
34  
35 community based projects conducted in both developed and developing countries,  
36  
37 which have either addressed prevention or management of select chronic conditions, is  
38  
39 that UDAY aims to address both prevention and management of concurrently and  
40  
41 comprehensively.  
42  
43

44  
45 However, the study has some limitations. Firstly, we used a pre-post study design for  
46  
47 evaluating the effect of our interventions. Though, a randomized controlled trial is a  
48  
49 better design to evaluate the effectiveness of interventions, providing a higher level of  
50  
51 evidence than a pre-post design, to study the effect of multi-component interventions  
52  
53 delivered at multiple levels in a comprehensive manner in a large population over a vast  
54  
55 geographic area, we considered the pre-post design as more appropriate for our study.  
56  
57  
58

1  
2  
3 Further, we also wanted to understand and examine the operational part of the program  
4 implementation to gain insights into underpinning factors behind success or failure that  
5  
6 can inform possible replication and scale up in the future.  
7  
8

9  
10 Secondly, our study does not include controls for the comparison. Given the size of the  
11 population covered by the interventions, we would have had to recruit control  
12  
13 communities of similar size and numbers, which wasn't feasible from an implementation  
14 and resources availability point of view. However, our baseline and end line surveys that  
15 evaluate the impact are done on independent random samples of the population, which  
16 should provide robust data regarding potential changes over baseline in the levels of:  
17  
18 public awareness and knowledge about diabetes and hypertension; those aware,  
19 diagnosed, treated and controlled to recommended targets; the use of guideline based  
20 management by providers leading to improved health outcomes and access to  
21  
22 healthcare for people living with diabetes and hypertension in India. In addition, we will  
23 be comparing our results with ongoing national survey data on NCDs and their risk  
24 factors (National Family Health Survey, Annual Health Survey, District Level Household  
25 Survey) as well as a New National NCD survey which is being implemented currently.  
26  
27 This will help assess secular trends and evaluate our findings in conjunction with such  
28 trends if any. Also we did not account for the regression to the mean as there would be  
29 at least some people both in the end line and baseline. We will do sensitivity analysis to  
30 explore this bias.  
31  
32

33  
34 Thirdly, one of the major interventions of our program is to implement a community  
35 based screening, follow-up and educational program through health workers. We  
36 specifically hired and trained health workers to implement this interventional component,  
37 which might add to the cost of implementing a community based diabetes and  
38  
39  
40  
41  
42  
43  
44  
45  
46  
47  
48  
49  
50  
51  
52  
53  
54  
55  
56  
57  
58  
59  
60

1  
2  
3 hypertension prevention and management program. However, the additional cost of is  
4 likely to be minimal as indicated by previous modelling estimates of training and using  
5 health workers.  
6  
7  
8  
9

10 Fourthly, we are using multi-component interventions at multiple levels (health  
11 promotion campaigns, health workers led home based screening, follow-up and  
12 education, training of healthcare providers, registry for facility based improvement in  
13 quality of care, patient networks and advocacy to strengthen the health system) which  
14 makes it difficult to evaluate the individual contribution of each intervention. However,  
15 the purpose is to deliver it in a comprehensive manner to improve outcomes, which to  
16 our knowledge has hitherto not been implemented in similar settings, and not to tease  
17 out impact of individual interventions in a milieu where many individuals have elevations  
18 of multiple NCD risk factors and suffer often from co-morbid conditions that require to be  
19 addressed comprehensively.  
20  
21  
22  
23  
24  
25  
26  
27  
28  
29  
30  
31  
32

33 It is anticipated that the results obtained from the study will inform policy makers on the  
34 most appropriate community and health system based approaches that are effective in  
35 stemming the rising burden of diabetes and hypertension in India and countries with  
36 similar challenges.  
37  
38  
39  
40  
41  
42  
43  
44  
45  
46  
47  
48  
49  
50  
51  
52  
53  
54  
55

## 56 **Data sharing and Contributorship statement**

57  
58  
59  
60

1  
2  
3 Data will be available to the study investigators only. De-identified data can be shared  
4  
5 with other researchers based on specific request to the publication sub-committee of the  
6  
7 project with potential research questions to be examined.  
8  
9

10  
11  
12 Sailesh Mohan, K. Srinath Reddy, Dorairaj Prabhakaran and Nikhil Tandon conceived  
13  
14 the study. Sailesh Mohan wrote the first draft of the manuscript. Prashant Jarhyan,  
15  
16 Shreeparna Ghosh, Nikhil Srinivasapura Venkateshmurthy, Ritu Rana, Cheena  
17  
18 Malhotra, Ruby Gupta, Bhaskara Rao and Sanjay Kalra wrote specific sections of the  
19  
20 manuscript as well as contributed to the design and implementation of the study.  
21  
22  
23 Bhaskara Rao and Sanjay Kalra also coordinate the activities in the study sites and  
24  
25 provide technical support. Sailesh Mohan, Shreeparna Ghosh, Prashant Jarhyan, and  
26  
27 Nikhil Srinivasapura Venkateshmurthy contributed to the collection and assembly of  
28  
29 data. All authors provided input into the study design, as well as provided critical  
30  
31 intellectual input for revision of the manuscript and approved the final version of the  
32  
33 manuscript.  
34  
35  
36  
37  
38  
39

#### 40 **Acknowledgements**

41  
42 The UDAY project is led by the Public Health Foundation of India, Gurgaon, India in  
43  
44 collaboration with Population Services International, India and Project HOPE. We  
45  
46 acknowledge the contributions of the field and research staff of the project. The funder  
47  
48 has no role in the design, implementation, and evaluation of the project as well as in the  
49  
50 writing of this paper. All contents of this paper are solely the responsibility of the  
51  
52 authors.  
53  
54

#### 55 **Funding source**

1  
2  
3 It is supported by an unrestricted educational grant from Eli Lilly and Company under  
4 the Lilly NCD Partnership Program.  
5  
6

7  
8 **Disclaimer**  
9

10 The funding agency had no role in the design, conduct or analysis of the study, and no  
11 role in the decision to submit the protocol for publication.  
12  
13

14 **Conflicts of interest**  
15

16 None declared  
17  
18  
19  
20  
21  
22  
23  
24  
25  
26  
27  
28  
29  
30  
31  
32  
33  
34  
35  
36  
37  
38  
39  
40  
41  
42  
43  
44  
45  
46  
47  
48  
49  
50  
51  
52  
53  
54  
55

56 **References**  
57  
58  
59  
60

1. National Multisectoral Action Plan for Prevention and Control of NCDs in India. World Health Organization (WHO) Country Office for India, New Delhi, 2013.
2. International Diabetes Federation. IDF Diabetes Atlas, 7th edition. 7th ed. Brussels, Belgium: International Diabetes Federation, 2015.
3. Reddy KS, Shah B, Varghese C, et al. Responding to the threat of chronic diseases in India. *Lancet* 2005; 366:1744-49.
4. Mohan S, Koller T. Hypertension and related comorbidities in India: Implications for the health system. World Health Organization (WHO) Country Office for India, New Delhi, 2013.
5. Nair M, Ali MK, Ajay VS, et al. CARRS Surveillance study: design and methods to assess burdens from multiple perspectives. *BMC Public Health* 2012;12:701.
6. Reddy KS, Prabhakaran D, Chaturvedi V, et al. Methods for establishing a surveillance system for cardiovascular diseases in Indian industrial populations. *Bull World Health Organ* 2006; 84:461-69.
7. International Institute for Population Sciences (IIPS) and Macro International. 2007. National Family Health Survey (NFHS-3), 2005–06: India: Volume II. Mumbai: IIPS.
8. World Health Organization. Global Physical Activity Questionnaire (GPAQ) Analysis Guide: World Health Organization. Available at: [http://www.who.int/chp/steps/resources/GPAQ\\_Analysis\\_Guide.pdf](http://www.who.int/chp/steps/resources/GPAQ_Analysis_Guide.pdf) (Assessed 15 December 2015)
9. Yusuf S, Hawken S, Ounpuu S, et al. Effect of potentially modifiable risk factors associated with myocardial infarction in 52 countries (the INTERHEART study): case-control study. *Lancet* 2004; 364:937-52.
10. EuroQol Group. EuroQol--a new facility for the measurement of health-related quality of life. *Health Policy* 1990; 16:199–208.
11. Poongothai S, Pradeepa R, Ganesan A, et al. Reliability and validity of a modified PHQ9 item inventory (PHQ12) as a screening instrument for assessing depression in Asian Indians (CURES—65). *J Assoc Physicians India* 2009; 57: 147–52.
12. Berra K, Franklin B, Jennings C. Community-Based Healthy Living Interventions. *Prog Cardiovasc Dis* 2017; 59:430-439.
13. Puska P. Why Did North Karelia-Finland Work? Is it Transferrable? *Glob Heart* 2016; 11:387-391.
14. Sarrafzadegan N1, Kelishadi R, Esmailzadeh A, Mohammadifard N, Rabiei K, Roohafza H, Azadbakht L, Bahonar A, Sadri G, Amani A, Heidari S, Malekafzali H. Do lifestyle interventions work in developing countries? Findings from the Isfahan Healthy Heart Program in the Islamic Republic of Iran. *Bull World Health Organ* 2009;87:39-50.
15. Harati H, Hadaegh F, Momenan AA, Ghanei L, Bozorgmanesh MR, Ghanbarian A, Mirmiran P, Azizi F. Reduction in incidence of type 2 diabetes by lifestyle intervention in a middle eastern community. *Am J Prev Med* 2010; 38:628-636.
16. Rawal LB, Tapp RJ, Williams ED, Chan C, Yasin S, Oldenburg B. Prevention of type 2 diabetes and its complications in developing countries: a review. *Int J Behav Med*. 2012; 19:121-33.

1  
2  
3  
4  
5  
6  
7  
8  
9  
10  
11  
12  
13  
14  
15  
16  
17  
18  
19  
20  
21  
22  
23  
24  
25  
26  
27  
28  
29  
30  
31  
32  
33  
34  
35  
36  
37  
38  
39  
40  
41  
42  
43  
44  
45  
46  
47  
48  
49  
50  
51  
52  
53  
54  
55  
56  
57  
58  
59  
60

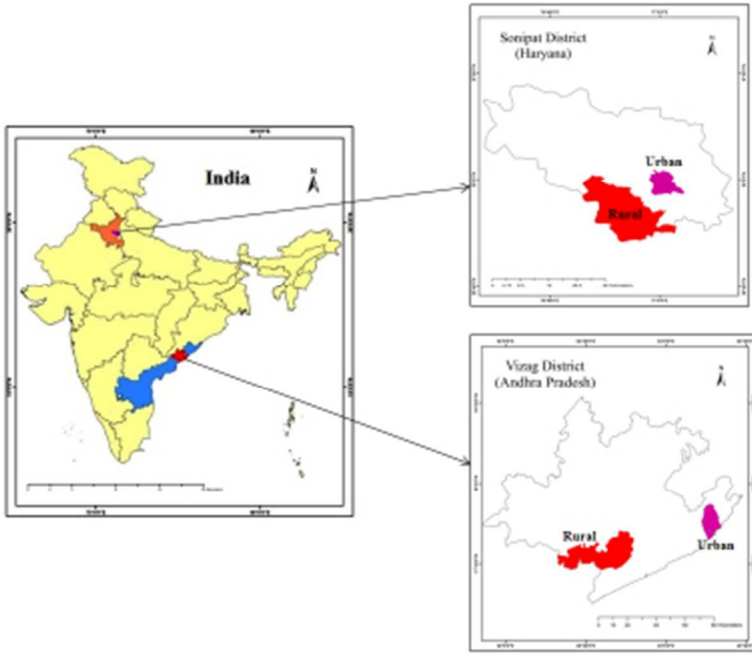

40x30mm (300 x 300 DPI)

ew only

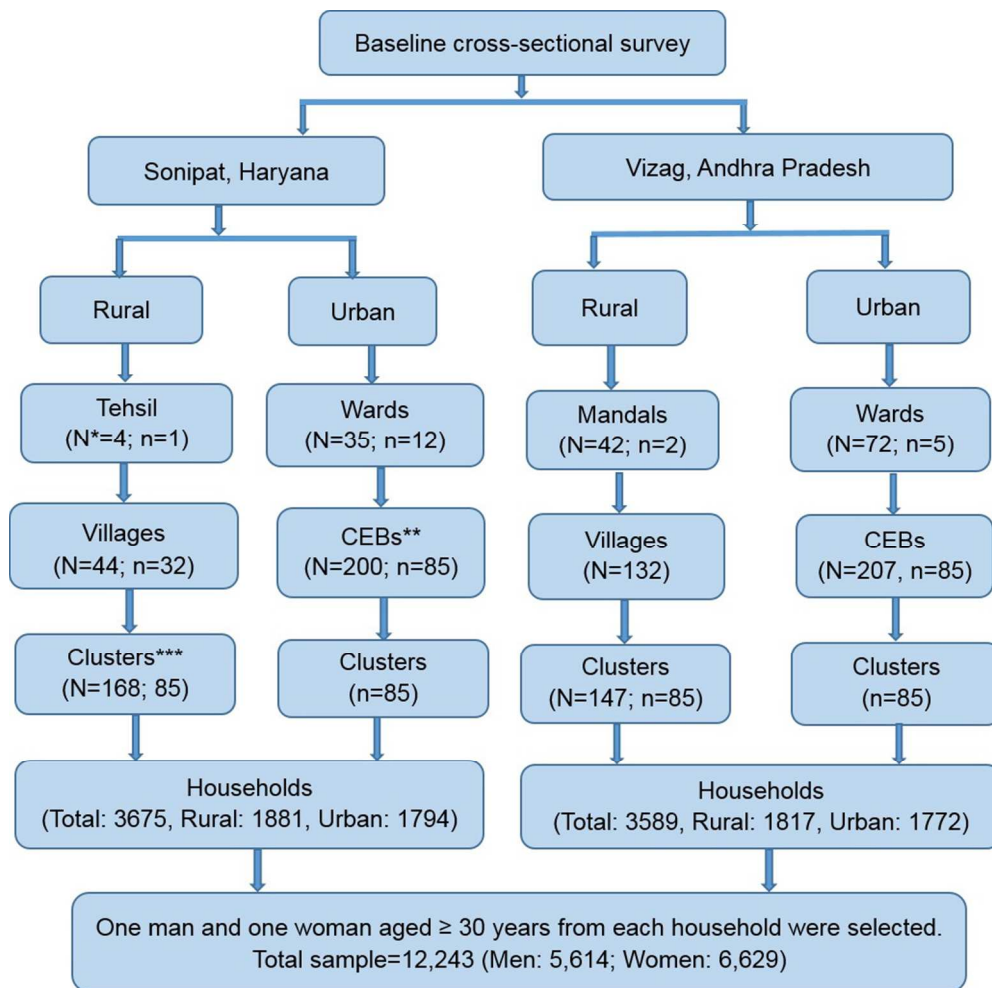

\*N=total, n=number selected

\*\*CEB=Census Enumeration Block

\*\*\*Cluster = In urban sub-site clusters comprise CEBs, in rural sub-site bigger villages were split into 2 or 3 clusters with sizes of 75-300 households.



1  
2  
3  
4  
5  
6  
7  
8  
9  
10  
11  
12  
13  
14  
15  
16  
17  
18  
19  
20  
21  
22  
23  
24  
25  
26  
27  
28  
29  
30  
31  
32  
33  
34  
35  
36  
37  
38  
39  
40  
41  
42  
43  
44  
45  
46  
47  
48  
49  
50  
51  
52  
53  
54  
55  
56  
57  
58  
59  
60

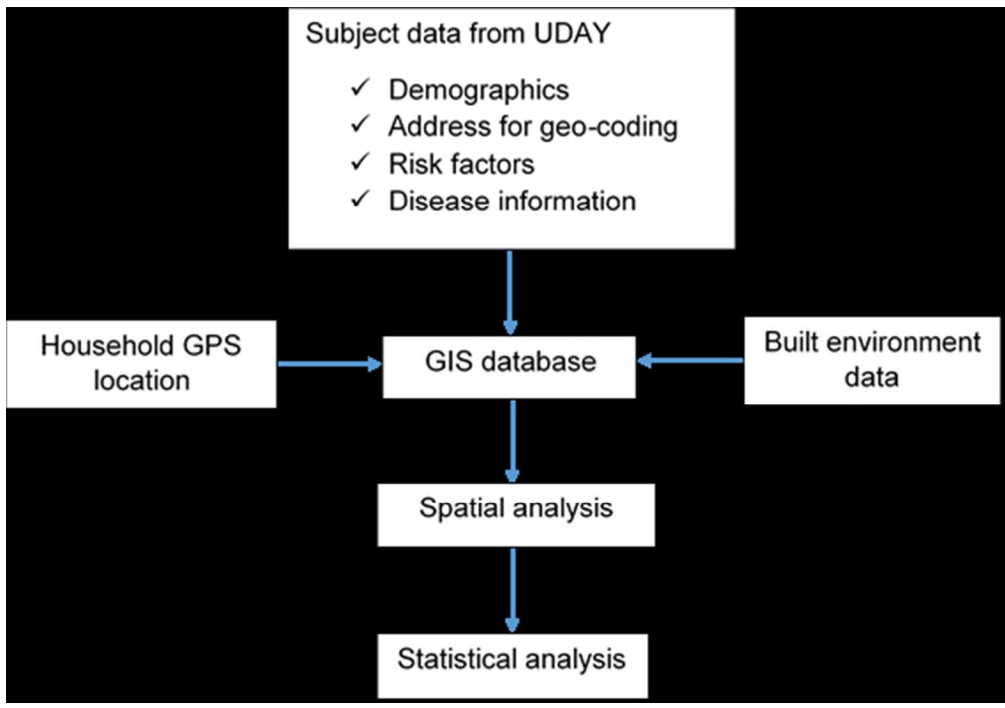

48x33mm (300 x 300 DPI)

iew only

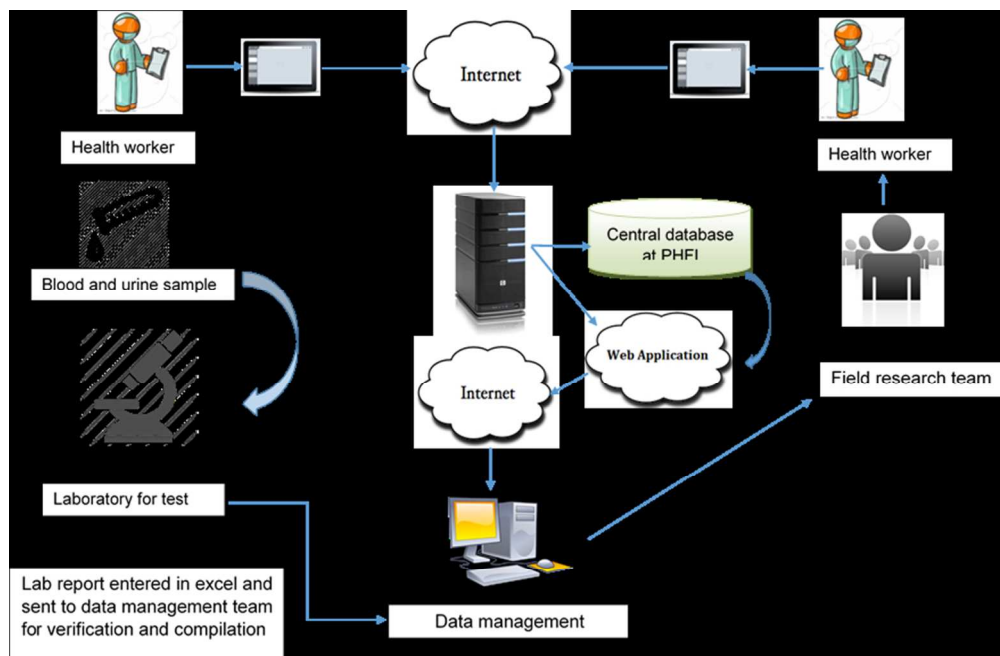

74x48mm (300 x 300 DPI)

view only

1  
2  
3  
4  
5  
6  
7  
8  
9  
10  
11  
12  
13  
14  
15  
16  
17  
18  
19  
20  
21  
22  
23  
24  
25  
26  
27  
28  
29  
30  
31  
32  
33  
34  
35  
36  
37  
38  
39  
40  
41  
42  
43  
44  
45  
46  
47  
48  
49  
50  
51  
52  
53  
54  
55  
56  
57  
58  
59  
60

## UDAY- Priority Ecosystem Interventions

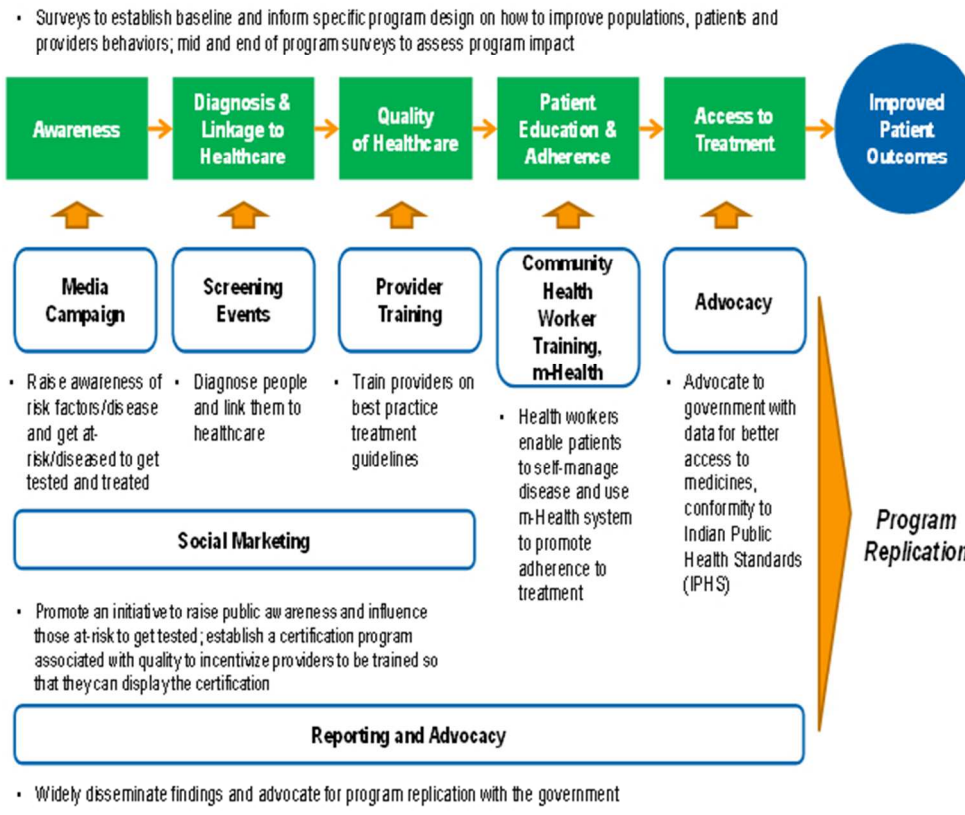

56x58mm (300 x 300 DPI)

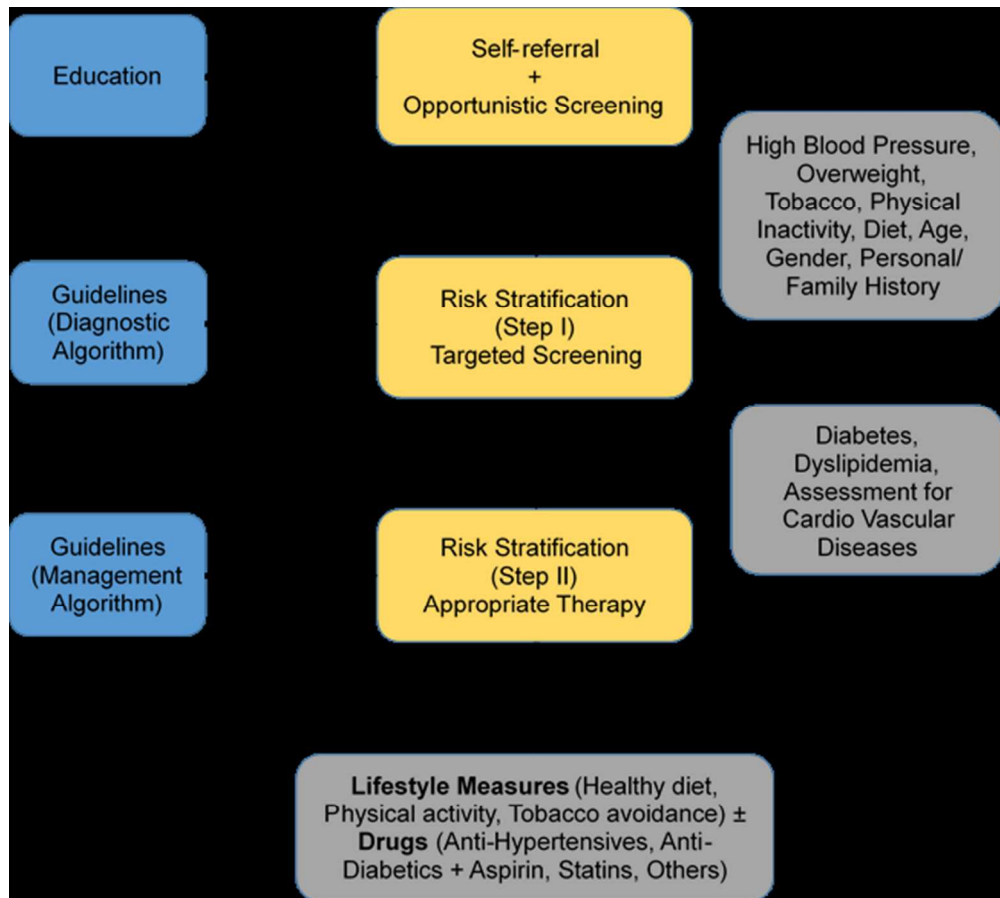

55x49mm (300 x 300 DPI)

only

### Supplementary file

Sonipat district in the state of Haryana, is north of India's capital city Delhi. It covers an area of 2,122 sq. km and has a population of 1,450,001 (Census 2011). The district has 4 tehsils (sub-districts), namely Gohana, Ganaur, Sonipat and Kharkhoda. Among these, we selected Sonipat tehsil as the urban sub-site and Kharkhoda as the rural sub-site.

Vizag district is one of the north eastern coastal district in the state of Andhra Pradesh and lies in proximity to the Bay of Bengal. It covers an area of 11,161 sq. km and has a population of 4,290,589 (Census 2011). Vizag district has 43 mandals (sub-districts) comprising 4 urban mandals and 39 rural mandals. Among these, we selected Vizag as the urban sub-site and Makavarapalem and Nathavaram as the rural sub-site.

# BMJ Open

## UDAY: Protocol of a Comprehensive Diabetes and Hypertension Prevention and Management Program in India

|                                 |                                                                                                                                                                                                                                                                                                                                                                                                                                                                                                                                                                                                                                                    |
|---------------------------------|----------------------------------------------------------------------------------------------------------------------------------------------------------------------------------------------------------------------------------------------------------------------------------------------------------------------------------------------------------------------------------------------------------------------------------------------------------------------------------------------------------------------------------------------------------------------------------------------------------------------------------------------------|
| Journal:                        | <i>BMJ Open</i>                                                                                                                                                                                                                                                                                                                                                                                                                                                                                                                                                                                                                                    |
| Manuscript ID                   | bmjopen-2017-015919.R2                                                                                                                                                                                                                                                                                                                                                                                                                                                                                                                                                                                                                             |
| Article Type:                   | Protocol                                                                                                                                                                                                                                                                                                                                                                                                                                                                                                                                                                                                                                           |
| Date Submitted by the Author:   | 06-Oct-2017                                                                                                                                                                                                                                                                                                                                                                                                                                                                                                                                                                                                                                        |
| Complete List of Authors:       | Mohan, Sailesh; Public Health Foundation of India<br>Jarhyan, Prashant; Public Health Foundation of India<br>Ghosh, Shreeparna; Public Health Foundation of India<br>Srinivasapura Venkateshmurthy, Nikhil; Public Health Foundation of India<br>Gupta, Ruby; Public Health Foundation of India<br>Rana, Ritu; Population Services International India<br>Malhotra, Cheena; Project Hope India<br>Rao, Bhaskara; MaxCure Hospital<br>Kalra, Sanjay; Bharti Hospital Karnal<br>Tandon, Nikhil; All India Institute of Medical Sciences,<br>Reddy, KS; Public Health Foundation of India<br>Prabhakaran, Dorairaj; Public Health Foundation of India |
| <b>Primary Subject Heading</b>: | Epidemiology                                                                                                                                                                                                                                                                                                                                                                                                                                                                                                                                                                                                                                       |
| Secondary Subject Heading:      | Diabetes and endocrinology, Health services research, Public health, Cardiovascular medicine                                                                                                                                                                                                                                                                                                                                                                                                                                                                                                                                                       |
| Keywords:                       | Hypertension < CARDIOLOGY, General diabetes < DIABETES & ENDOCRINOLOGY, EPIDEMIOLOGY                                                                                                                                                                                                                                                                                                                                                                                                                                                                                                                                                               |
|                                 |                                                                                                                                                                                                                                                                                                                                                                                                                                                                                                                                                                                                                                                    |

SCHOLARONE™  
Manuscripts

1  
2  
3 **UDAY: Protocol of a Comprehensive Diabetes and Hypertension Prevention and**  
4  
5 **Management Program in India**  
6  
7  
8  
9

10 Authors: Sailesh Mohan,<sup>1</sup> Prashant Jarhyan,<sup>1</sup> Shreeparna Ghosh,<sup>1</sup> Nikhil  
11  
12 Srinivasapura Venkateshmurthy,<sup>1</sup> Ruby Gupta,<sup>1</sup> Ritu Rana,<sup>2</sup> Cheena Malhotra,<sup>3</sup>  
13  
14 Bhaskara Rao,<sup>4</sup> Sanjay Kalra,<sup>5</sup> Nikhil Tandon,<sup>6</sup> K. Srinath Reddy,<sup>1</sup> Dorairaj  
15  
16 Prabhakaran<sup>1</sup>  
17  
18  
19  
20

21 <sup>1</sup> Public Health Foundation of India, Gurgaon, India  
22

23 <sup>2</sup> Population Services International, Delhi, India  
24

25 <sup>3</sup> Project HOPE, Delhi, India  
26

27 <sup>4</sup> Manipal Hospitals, Visakhapatnam, India  
28

29 <sup>5</sup> Bharti Hospital, Karnal, India  
30

31 <sup>6</sup> All India Institute of Medical Sciences, Delhi, India  
32  
33  
34  
35  
36  
37  
38  
39  
40  
41  
42  
43  
44  
45  
46  
47  
48  
49  
50

51 Corresponding author  
52 Dr. Sailesh Mohan  
53 Additional Professor  
54 Public Health Foundation of India  
55 Email:smohan@phfi.org  
56  
57  
58  
59  
60

## Abstract

### Introduction

Diabetes and hypertension are two leading noncommunicable conditions, which are sub-optimally managed in India. Thus, innovative comprehensive approaches that can concomitantly improve their detection, prevention and control are warranted.

### Methods and analysis

UDAY, a 5-year initiative aims to reduce the risk of diabetes and hypertension and improve management by implementing a comprehensive intervention program in the two selected study sites, Sonipat and Visakhapatnam (Vizag). It has a pre-post evaluation design with representative cross-sectional surveys before and after intervention. Within these two sites, urban and rural sub-sites each with a total population of approximately 1, 00,000 people each were selected and a baseline and post intervention assessment will be conducted deploying 5 surveys [among general population (including body measurements or bio-samples), patients, healthcare providers including physicians and pharmacists, health facilities] which will determine: the knowledge levels about diabetes and hypertension, the proportion treated and controlled; the patient knowledge and self-management skills; healthcare providers' management practices; the level of access and barriers to obtaining care. The interventions will include: tailored health promotion for improving public knowledge; screening of adults aged  $\geq 30$  years for identifying those at high risk of diabetes and/or hypertension for linkage to the healthcare system; patient education using technology enabled community health workers, geographic information system (GIS) based mapping of the communities, healthcare provider training on management guidelines, community based diabetes registry and; advocacy to improve access to healthcare. The baseline surveys have been completed, the study areas mapped using GIS and the interventions are being implemented. UDAY is expected to increase over baseline the levels of: public knowledge about diabetes and hypertension; those treated and controlled; patient self-management skills; the use of guideline based management by providers and; access to healthcare, leading to improved health outcomes and inform development of a India relevant chronic care model.

### Ethics and dissemination

Ethical clearance for conduct of the study was obtained from the Institutional Ethics Committee (IEC) of the Public Health Foundation of India. The findings will be targeted primarily at public health policymakers and advocates, but will be disseminated widely through other mechanisms including conference presentations and peer-reviewed publications, as well as to the participating communities.

### Strengths and limitations of this study



- Unique large community based study in geographically and culturally diverse “real world” settings in India for improving prevention and control of diabetes and hypertension.
- Employs a comprehensive multi-level, multi component intervention approach to target the general population, patients, providers and to strengthen the health system for improving prevention and control of diabetes and hypertension.
- Concomitantly addresses detection, prevention and management of both diabetes and hypertension.
- Extensively leverages mobile technology to enable health workers in task sharing as well as for electronic data capture.
- Quasi experimental design with complex intervention may hinder attribution of specific effect to individual intervention components.

## Introduction

Non-communicable Diseases (NCDs) are currently the leading cause of preventable death and disability in India, accounting for two out of every three deaths [1]. Among NCDs, the prevalence of type-2 diabetes mellitus (DM) and hypertension have been rising rapidly. Currently there are about 69 million people with diabetes, a figure that is projected to further increase to a staggering 124 million by 2040 [2]. The number of individuals with hypertension is projected to increase to 214 million by 2030 from 118 million in 2000 [3,4]. Furthermore, diabetes and hypertension are important risk factors for both the major forms of cardiovascular disease [CVD (coronary heart disease and stroke)], highly prevalent and attributable to nearly half of all the deaths from NCDs [4].

Despite the availability of proven and effective treatments, diabetes as well as hypertension detection and control rates are abysmally low in India with blood pressure control among those with diabetes being even more sub-optimal, with a huge gap between detection and adequate treatment [1,3,4]. Thus, there is great potential and opportunity to reduce the rising burden of diabetes and hypertension as well as the

1  
2  
3 associated vascular risk in India through concomitantly improving their detection,  
4  
5 prevention and control.  
6  
7  
8  
9

10 To address this huge gap in the prevention and management of both these conditions  
11 we are undertaking a 5-year initiative entitled “UDAY” (meaning dawn in *Sanskrit*) in  
12 epidemiologically transitioning communities, that aims to reduce the risk of diabetes and  
13 hypertension and concomitantly improve the management of either conditions by  
14 implementing a comprehensive community based innovative intervention program in the  
15 two geographically and culturally distinct study sites, Sonipat (Haryana, North India) and  
16 Visakhapatnam or Vizag (Andhra Pradesh, South India). This paper describes the  
17 design and methods of UDAY- A Comprehensive Diabetes and Hypertension  
18 Prevention and Management Program In India.  
19  
20  
21  
22  
23  
24  
25  
26  
27  
28  
29  
30  
31  
32

## 33 **Methods**

### 34 Study design

35 UDAY has a pre-post evaluation design with representative cross sectional surveys  
36 before (in year one at baseline, pre-intervention) and after the intervention (in year 5).  
37  
38 The main research question is: whether a multi-component, multi-level, cost-effective,  
39 comprehensive intervention program will improve the prevention, detection and optimal  
40 management of diabetes and hypertension in the two selected study sites. Ethical  
41 clearance for conduct of the study was obtained from the Institutional Ethics Committee  
42 (IEC) of the Public Health Foundation of India.  
43  
44  
45  
46  
47  
48  
49  
50  
51  
52

53 We selected a pre-post evaluation design due to the following reasons. We wanted to  
54 evaluate if multi-component interventions delivered at multiple levels in a  
55  
56  
57  
58  
59  
60

1  
2  
3 comprehensive manner can improve outcomes. Further, we also wanted to understand  
4 and examine the operational part of the program implementation to gain insights into  
5  
6 underpinning factors behind success or failure that can inform possible replication and  
7  
8 scale up in the future. The options for an implementation study of this nature with  
9  
10 process outcomes are either a pre-post design or quasi-experimental design or step  
11  
12 wedge design. We deemed a step wedge to be too complicated for this evaluation and  
13  
14 given that quasi experimental design would not have enough power to decipher real  
15  
16 differences, we chose a pre-post design. This was also aimed at cutting down costs.  
17  
18 At baseline, in year one, 5 surveys were conducted among the general population,  
19  
20 among patients, among healthcare providers including physicians and pharmacists and  
21  
22 in health facilities to guide intervention development and impact assessment. Similar  
23  
24 assessment is planned after the intervention, in year 5.  
25  
26  
27  
28  
29  
30  
31  
32

33 The specific objectives these assessments are to:

- 34  
35 1. Determine the prevalence, awareness, the knowledge levels about diabetes and  
36  
37 hypertension, the proportion treated and controlled among a representative  
38  
39 sample (n=12000) of adults aged  $\geq 30$  years in the selected study areas.  
40  
41 (Population survey)  
42  
43
- 44  
45 2. Determine the patient knowledge levels and self-management skills among a  
46  
47 convenience sample (n=400) of those diagnosed with diabetes and hypertension  
48  
49 in the selected study areas. (Patient survey)  
50  
51
- 52  
53 3. a) Determine healthcare providers' (physicians) knowledge and practices related  
54  
55 to diabetes and hypertension management among a convenience sample (n=50)  
56  
57 of healthcare providers' in the selected study areas.  
58  
59  
60

1  
2  
3 b) Determine pharmacists' knowledge related to diabetes and hypertension and  
4 dispensing practices among a convenience sample of pharmacists (n=350)  
5  
6  
7 (Provider survey)  
8  
9

10 4. Determine the level of access and potential barriers to diabetes and hypertension  
11 care provided by the public healthcare system in the selected study areas (n=50).  
12  
13 (Facility survey)  
14  
15

16  
17 5. Determine the cost-effectiveness of the intervention program in improving  
18 diabetes and hypertension treatment and management outcomes in the study  
19 areas. (Using population survey, GIS data and project implementation data)  
20  
21  
22  
23  
24  
25

## 26 Study sites

27  
28 We are undertaking this comprehensive diabetes prevention and management program  
29 in two epidemiologically transitioning areas located in Sonipat in Haryana and Vizag in  
30 Andhra Pradesh (Figure 1, supplementary file).  
31  
32  
33  
34  
35  
36  
37

### 38 **Figure 1: Study sites (insert here)**

39  
40  
41  
42 We defined the areas and their sub-areas using the following terminology:  
43

- 44 • Sites – a bounded geographic area within which we have defined distinct rural  
45 and urban sub-sites for the study. Each site has been defined such that it  
46 contains approximately 2,00,000 people. Sonipat and Vizag are each a site.  
47  
48
- 49 • Sub-sites – within each site, we have defined one rural and one urban sub-site  
50 for study. Each sub-site is geographically bounded, and contains a population of  
51  
52  
53  
54  
55  
56  
57  
58  
59  
60

approximately 1,00,000. Within Sonipat and Vizag, we have defined two sub-sites each (rural and urban).

- Total project – the total project is the summation of the two sites, including the four sub-sites (two sub-sites within each site). Therefore the total population under the study is approximately 4,00,000.

### Intervention program

We propose to implement a priority set of synergistic innovative ecosystem interventions (Figure 2, Table 1), with the overarching goal to prevent, detect, reduce the risk of diabetes and hypertension and to improve the treatment and management of individuals with either of the conditions in the study sites. We hypothesize (Figure 3) that education of the public on diabetes, hypertension and related risks will lead to increased self-referral and prevention, while education of the healthcare providers will promote opportunistic screening for diabetes, hypertension and related risks, and purposeful implementation of evidence based diagnostic (to screen, stratify by risk) and management guidelines (to initiate appropriate therapy).

### **Figure 2: Priority interventions in UDAY (insert here)**

**Table 1: Innovations in UDAY**

| <b>Intervention domain</b>               | <b>Approach</b>                                 | <b>Target</b>        |
|------------------------------------------|-------------------------------------------------|----------------------|
| Prevention, early detection and referral | Culturally tailored health promotion, screening | 400,000 population   |
| Capacity building, task                  | CME, short trainings,                           | Healthcare providers |

|                                                                           |                               |                  |
|---------------------------------------------------------------------------|-------------------------------|------------------|
| shifting of healthcare providers                                          | distance learning, QIP        |                  |
| Early diagnosis and prevention of complications                           | Registry                      | 10,000 patients  |
| m-health system                                                           | Electronic data system +DSS   | Adult population |
| Electronic data capture                                                   | Tablet based surveys          | 12,000           |
| Spatial and built environment assessment                                  | GIS mapping                   | All study areas  |
| Improved access to medicines by social marketing initiatives              | Improving quality of services | 300 pharmacists  |
| Culturally tailored patient education and networks for enabling self-care | Utilizing health workers      | Patients         |

**Figure 3: Intervention framework (insert here)**

Following the baseline assessments a comprehensive intervention program is being currently implemented. The intervention components includes:

1. tailored health promotion using social marketing approaches for increasing public awareness and promoting population risk factor modification and reduction;
2. community based screening of all adults aged  $\geq 30$  years for identifying those at high risk of diabetes and/or hypertension or with disease to link to the healthcare system leveraging task-sharing approaches utilizing technology enabled health workers;
3. patient education using technology enabled health workers,
4. healthcare provider training on evidence based management guidelines,
5. implementation of a quality improvement program and diabetes registry and;

- 1  
2  
3 6. advocacy with governments and other stakeholders to improve access to  
4  
5 healthcare.  
6  
7  
8  
9

10 It is expected that the comprehensive interventions will increase over baseline the levels  
11 of: public awareness and knowledge about diabetes and hypertension; those aware,  
12 diagnosed, treated and controlled to recommended targets; the use of guideline based  
13 management by providers. Detailed outcome assessment metrics is provided in table 2.  
14  
15 This is anticipated to improve health outcomes and access to healthcare for people  
16 living with diabetes and hypertension in India as well as provide a model of healthcare  
17 which is low-cost, community based and context relevant in a milieu of rapid rise in  
18 these chronic conditions.  
19  
20  
21  
22  
23  
24  
25  
26  
27  
28  
29  
30  
31  
32  
33  
34

35 **Table 2: Assessment of intervention outcomes**  
36  
37

| Indicator           | Target Population                  | Metric                                                                                                                             | Evaluation Methodology                          |
|---------------------|------------------------------------|------------------------------------------------------------------------------------------------------------------------------------|-------------------------------------------------|
| 1. Patient outcomes | Diabetes and hypertension patients | % implementing lifestyle change (meet the recommended levels of physical activity, and intend to and/or implement dietary changes) | Baseline and endline surveys, diabetes registry |
|                     |                                    | % engaging in self-monitoring/testing                                                                                              | Baseline and endline surveys, diabetes registry |
|                     |                                    | % increase in correct self-management practices                                                                                    | Baseline and endline surveys, diabetes registry |
|                     |                                    | % increase in knowledge on diabetes and hypertension                                                                               | Baseline and endline surveys, diabetes registry |

|                                                            |                                  |                                                                                                                                    |                                                                                |
|------------------------------------------------------------|----------------------------------|------------------------------------------------------------------------------------------------------------------------------------|--------------------------------------------------------------------------------|
|                                                            |                                  | % of patients on treatment, whose diabetes, hypertension is successfully controlled, i.e., HbA1C ≤ 7% / BP ≤ 130/80 mm Hg          | Baseline and endline surveys, diabetes registry                                |
| 2. Awareness and knowledge about diabetes and hypertension | General population               | % increase in knowledge of diabetes, hypertension and their risk factors                                                           | Baseline and endline surveys                                                   |
|                                                            |                                  | % increase in detection rate and in seeking healthcare                                                                             | Baseline and endline surveys, screening program                                |
|                                                            |                                  | % implementing lifestyle change (meet the recommended levels of physical activity, and intend to and/or implement dietary changes) | Baseline and endline surveys, screening program                                |
|                                                            |                                  | % exposed to health promotion campaign                                                                                             | Baseline and endline surveys, screening program                                |
| 3. Provider knowledge and practices                        | Physicians, other health workers | # who participate in training programs                                                                                             | Training participation data                                                    |
|                                                            |                                  | % increase in knowledge related to diabetes and hypertension management                                                            | Baseline and endline surveys of providers, diabetes registry                   |
|                                                            |                                  | % increase in practices related to diabetes and hypertension management and providing lifestyle advice                             | Baseline and endline surveys of providers, diabetes registry                   |
|                                                            | Pharmacists                      | % of pharmacists who identify people at risk of and with diabetes, hypertension                                                    | Baseline and endline surveys of providers                                      |
|                                                            |                                  | % increase in pharmacists dispensing and filling prescriptions correctly                                                           | Baseline and endline surveys of providers, diabetes registry                   |
| 4. Program cost-effectiveness                              | Diabetes patients                | Cost per diabetic patient treated to recommended target                                                                            | Baseline and endline surveys of patients, program cost data, diabetes registry |
|                                                            |                                  | % reduction in out of pocket expenditure                                                                                           | Baseline and endline surveys of patients, diabetes registry                    |
|                                                            | General population               | Cost per diabetes case identified                                                                                                  | Surveys, screening program, program cost data                                  |



|                        |                   |                                                                                      |                                                                              |
|------------------------|-------------------|--------------------------------------------------------------------------------------|------------------------------------------------------------------------------|
| 5. Access to treatment | Healthcare system | Improvements in access to and availability of medications                            | Baseline and endline surveys of patients, facility survey, diabetes registry |
|                        |                   | % increase in the proportion patients who report that medicines are easily available | Baseline and endline surveys of patients, facility survey, diabetes registry |
|                        |                   | % reduction in stock outs of medicines                                               | Baseline and endline surveys of patients, facility survey, diabetes registry |
|                        |                   | Adherence to IPHS guidelines on drugs, services                                      | Facility survey, diabetes registry                                           |

### Intervention development

We used evidence based interventions and leveraged the results from the baseline surveys (population, patient, facility and providers) to develop and refine the interventions, which were subsequently piloted. For example, from population survey we found that there were differences in the awareness of risk factors for developing diabetes/hypertension across rural/urban areas and the two study sites in North and South India. Therefore, taking this into cognizance, we designed the tailored health promotion program and messages to be delivered by trained health workers to increase awareness about the risk factors. Facility and providers' surveys helped us to design the training programs for training healthcare providers as well as to conduct advocacy to improve access to the health system. Similarly, findings from the patients' survey helped us to focus the training of health workers on building self-management skills of people with diabetes/hypertension and for developing patient networks.

### Sample for the population survey

We based our sample size calculation on the prevalence of diabetes, which has a lower prevalence than hypertension, in previously reported studies in India. Anticipating a response rate of 85 % with a design effect factor of 1.5 (to account for cluster sampling, and a confidence level of 1.96, the sample size estimates were generated for males and females in three age strata (30-49, 50-69, 69 and above) in each setting (urban, rural). About 2968 subjects was estimated to be required per urban sub-site (Sonipat and Vizag) and 2942 subjects per rural sub-site (Sonipat and Vizag). The total estimated sample was 11820, which was increased to 12000 to obtain equal samples in both urban and rural areas. Sample weights were generated for estimating the prevalence of diabetes, hypertension and related cardiometabolic risk factors at the district level.

### Survey sampling and participant selection

#### Population survey

Two representative population based cross sectional surveys with independent samples and identical methodologies at baseline and at the end of intervention will be conducted, that will provide estimates of the burden and changes in the prevalence of diabetes, hypertension, and related cardiometabolic risk factors. In addition, those recruited for the first survey at baseline (which has been completed), will be followed up as a cohort to estimate the incidence of new cardio-metabolic (CMD) risk factors, disease, healthcare utilization, diabetes and hypertension related morbidity and mortality.

1  
2  
3 The first population survey (baseline survey) was done among a representative sample  
4 of adults aged  $\geq 30$  years residing in the selected study areas of Sonipat and Vizag.

5  
6 Inclusion criteria – a) adults aged  $\geq 30$  years residing in the sampled urban and rural  
7 areas of Sonipat and Vizag respectively. b) willing to participate and provide informed  
8 consent.  
9

10  
11 We excluded individuals who were unwilling to provide informed consent and those with  
12 serious chronic illnesses [such as that of the liver (cirrhosis), kidneys (renal failure) or  
13 malignancies], pregnant women.  
14

15  
16 For the baseline survey, a multistage random sampling technique was deployed to  
17 obtain a representative sample of adults aged  $\geq 30$  years, using data from the most  
18 recent census of 2011. In addition, a manual enumeration and mapping of all  
19 households and structures was conducted in all the study areas [all census enumeration  
20 blocks (CEBs) in urban areas and villages in rural], to identify households and  
21 structures constructed since the last census (Table 3). CEBs are considered as the  
22 primary sampling unit in urban areas and villages in the rural areas respectively. On  
23 average, about 100-125 households with a population of 650-700 persons would  
24 generally constitute a CEB. This enabled a complete sampling frame for the selection of  
25 households for the survey and thus provided an equal chance of selection to each  
26 household. Besides, it also helped identify potential recipients of the intervention  
27 program (i.e., adults aged  $\geq 30$  years) in the study sites.  
28

29  
30 In each sub-site, 85 clusters were randomly selected (urban Sonipat: 85/200 CEBs,  
31 urban Vizag: 85/207 CEBs and rural Sonipat: 85/168 clusters, rural Vizag: 85/147  
32 clusters) according to probability proportional to size (Figure 4). In rural sub-sites, bigger  
33  
34  
35  
36  
37  
38  
39  
40  
41  
42  
43  
44  
45  
46  
47  
48  
49  
50  
51  
52  
53  
54  
55  
56  
57  
58  
59  
60

villages were divided into clusters with 75 to 300 households. From each cluster in the urban and rural sub-sites, 18 to 25 households were randomly selected and 1 eligible male and female were selected randomly within each household using Kish table. In Sonipat district, 3675 households participated in baseline survey (rural: 1881, urban: 1794) with total being 6208 participants (rural: 3104, urban: 3104). In Vizag district, 3589 households (rural: 1817, urban: 1772) participated in the baseline survey with total being 6035 participants (rural: 3069, urban: 2966). Thus, we had 12000 individuals from both urban and rural areas of North and South India.

**Table 3: Manual enumeration of study areas**

| Study site             | Structures | Households | Population ≥30 years | Total population (census 2011) |
|------------------------|------------|------------|----------------------|--------------------------------|
| Sonipat urban sub-site | 24408      | 20406      | 41981                | 102292                         |
| Sonipat rural sub-site | 28813      | 17283      | 40850                | 100935                         |
| Vizag urban sub-site   | 16888      | 39504      | 70735                | 153721                         |
| Vizag rural sub-site   | 33799      | 30817      | 59540                | 121209                         |

**Figure 4: Sample selection for the baseline survey (insert here)**

\*N=total, n=number selected

\*\*CEB=Census Enumeration Block

\*\*\*Cluster = In urban sub-site clusters comprise CEBs, in rural sub-site bigger villages were split into 2 or 3 clusters with sizes of 75-300 households.

### Data collection for the population survey

For the baseline survey, trained health workers visited the selected participants at their homes. Written informed consent was sought and obtained from the selected individuals prior to data collection and a unique identification number was assigned. For each participant, data collection comprised an interviewer administered questionnaire, a brief physical examination (height, weight, waist circumference, hip circumference, blood pressure, body fat percentage), blood and urine collection as detailed below.

Information on demographics, socio-economic characteristics, behavioral risk factors (tobacco use, alcohol use, diet and physical inactivity), family history of various NCDs, female reproductive history, general awareness about diabetes and hypertension, risk factors, prevention, symptoms and diagnosis, complications, treatment and management, medical history of NCDs [diabetes, hypertension, coronary artery disease (CAD), myocardial infarction (MI), stroke, heart failure, chronic kidney disease (CKD), peripheral vascular disease (PVD), chronic obstructive pulmonary disease (COPD), asthma], quality of life, mental health, social support, cost of healthcare and healthcare utilization was collected using a tablet based application (Table 4).

Body measurements such as height, weight, waist and hip circumferences, blood pressure and body fat measurement by bio impedance using TANITA were also obtained using standardized equipment.

Bio-samples (fasting blood and morning urine) were collected for the laboratory estimation of fasting plasma glucose, glycated hemoglobin (HbA1c), lipids, serum creatinine, urea, urine microalbumin and urine creatinine. We have also stored the bio samples for future analysis of emerging biomarkers and genetics.

**Table 4: Summary of indicators, measures, methods and instruments for baseline survey**

| Indicators                                      | Measures                                                                                                 | Methods                                                 | Instruments                                                                                                                                                                                                                                                      |
|-------------------------------------------------|----------------------------------------------------------------------------------------------------------|---------------------------------------------------------|------------------------------------------------------------------------------------------------------------------------------------------------------------------------------------------------------------------------------------------------------------------|
| Demographics and socio-economic characteristics | Age, sex, marital status, religion, education, income, occupation, contact details, and household assets | Questionnaires                                          | Centre for cArdio-metabolic Risk Reduction in South Asia(CARRS) Surveillance Study [5]<br>Establishment of Sentinel Surveillance System for CVD in Indian Industrial Populations (Sentinel Surveillance Study) [6]<br>National Family Health Survey, 2005-06 [7] |
| Behavioral risk factors                         | Tobacco use<br>Alcohol use<br><br>Physical activity<br><br>Dietary habits                                | Questionnaire<br><br>Questionnaire<br><br>Questionnaire | CARRS, Sentinel Surveillance Study<br><br>Global Physical Activity Questionnaire (GPAQ-2) [8]<br><br>CARRS,INTERHEART Study[9]                                                                                                                                   |
| Family history                                  | Prevalence of cardiometabolic diseases (CMDs) among family members related to participants, mortality    | Questionnaire                                           | CARRS                                                                                                                                                                                                                                                            |
| Female                                          | Menarche/                                                                                                | Questionnaire                                           | CARRS                                                                                                                                                                                                                                                            |

|                                            |                                                                                                                                              |                                                                              |                                                                                                                                                                                                                            |
|--------------------------------------------|----------------------------------------------------------------------------------------------------------------------------------------------|------------------------------------------------------------------------------|----------------------------------------------------------------------------------------------------------------------------------------------------------------------------------------------------------------------------|
| reproductive history                       | gestational history, menopause (surgical / physiological / whether on hormone replacement therapy) / contraception                           |                                                                              |                                                                                                                                                                                                                            |
| Awareness and knowledge                    | General awareness about diabetes and hypertension, risk factors, prevention, symptoms and diagnosis, complications, treatment and management | Questionnaire                                                                | CARRS                                                                                                                                                                                                                      |
| Physiological and biochemical risk factors | Hypertension                                                                                                                                 | Blood pressure measurements                                                  | Standardized method (American Heart Association) and validated instrument (certified by British Hypertensive Society and Association for the Advancement of Medical Instrumentation)<br>Standardized across both the sites |
|                                            | Diabetes                                                                                                                                     | Laboratory estimation of fasting plasma glucose, glycated hemoglobin (HbA1c) | Standardized across both the sites                                                                                                                                                                                         |
|                                            | Dyslipidemia                                                                                                                                 | Laboratory estimation of serum total cholesterol, low                        | Standardized across both the                                                                                                                                                                                               |

|                                                                           |                                                                                                                           |                                                                                                                                                                                                                     |                                                                                                                                                                                  |
|---------------------------------------------------------------------------|---------------------------------------------------------------------------------------------------------------------------|---------------------------------------------------------------------------------------------------------------------------------------------------------------------------------------------------------------------|----------------------------------------------------------------------------------------------------------------------------------------------------------------------------------|
|                                                                           | Obesity                                                                                                                   | <p>density lipoprotein cholesterol, very low density lipoprotein cholesterol, high density lipoprotein cholesterol, triglycerides</p> <p>Anthropometry (height, weight, waist and hip circumferences, body fat)</p> | <p>sites</p> <p>Standard procedures based on National Health And Nutrition Examination Survey-III with instruments used in epidemiological studies on South Asian population</p> |
| Medical history                                                           | <p>Chronic kidney disease</p> <p>Stroke, myocardial infraction, Congestive heart failure, Chronic stable angina</p>       | <p>Serum creatinine, urea, urine microalbumin and urine creatinine</p> <p>Questionnaires including medical history</p>                                                                                              | <p>Standardized across both the sites</p> <p>Rose Angina, CARRS</p>                                                                                                              |
| Treatment history, health services, quality of care and health care costs | <p>Awareness and risk factor control</p> <p>Access to health care services, utilization of services, health insurance</p> | Questionnaire                                                                                                                                                                                                       | CARRS                                                                                                                                                                            |



|                                |                                                                                                               |               |                                                                         |
|--------------------------------|---------------------------------------------------------------------------------------------------------------|---------------|-------------------------------------------------------------------------|
|                                | coverage, costs of treating CMDs and their risk factors                                                       |               |                                                                         |
| Prevalence                     | COPD and asthma                                                                                               | Questionnaire | NHANES III and present standards of the American Thoracic Society (ATS) |
| Health related Quality of Life | Mobility, self-care, usual activities, pain/discomfort, anxiety/depression (related to CMDs and risk factors) | Questionnaire | European Quality of Life 5 Dimensions questionnaire (EQ-5D-3L) [10]     |
| Mental health                  | Depression                                                                                                    | Questionnaire | Modified from Patient Health Questionnaire 9 (PHQ-12) [11]              |
| Social well-being              | Social support                                                                                                | Questionnaire | Developed for UDAY                                                      |

### Data collection for the patient survey

Trained research staff visited health facilities located in the aforementioned selected study areas and approached patients attending outpatient section of the health facilities and identified those with the diagnosis of diabetes and/or hypertension based on their prescription note for participating in the study. Written informed consent was sought and obtained from the individuals prior to data collection and data collection comprised an interviewer administered questionnaire (Table 5).

The patient survey was done among a convenience sample of 400 patients having diabetes and/or hypertension attending health facilities and residing in the selected study areas of Sonipat and Vizag.

Inclusion criteria: We included patients with diabetes and or hypertension residing/attending health facilities in the sampled urban and rural areas of Sonipat and Vizag respectively and were willing to participate and provide informed consent.

Exclusion criteria: We excluded those unwilling to provide informed consent.

**Table 5: Summary of indicators, measures, methods and instruments for the patient survey**

| Indicators                                           | Measures                                                                                                                      | Methods        | Instruments                           |
|------------------------------------------------------|-------------------------------------------------------------------------------------------------------------------------------|----------------|---------------------------------------|
| Demographics and socio-economic characteristics      | Age, sex, education, income, occupation, contact details                                                                      | Questionnaires | CARRS<br>Sentinel Surveillance Study  |
| Behavioral risk factors                              | Tobacco use<br>Alcohol use                                                                                                    | Questionnaire  | CARRS, Sentinel Surveillance Study    |
| Awareness and knowledge of diabetes and hypertension | Awareness of risk factors, symptoms and diagnosis, cut-off levels for diagnosis, complications, treatment and management      | Questionnaire  | Developed for UDAY                    |
| Diabetes and hypertension related medical history    | Diagnosis, health care utilization, control, self-management practices, complications, comorbidities, and treatment adherence | Questionnaire  | Developed for UDAY                    |
| Health related Quality of Life                       | Mobility, self-care, usual activities,                                                                                        | Questionnaire  | European Quality of Life 5 Dimensions |

|                        |                                                                        |               |                                                       |
|------------------------|------------------------------------------------------------------------|---------------|-------------------------------------------------------|
|                        | pain/discomfort, anxiety/depression (related to CMDs and risk factors) |               | questionnaire (EQ-5D-3L)                              |
| Mental health          | Depression                                                             | Questionnaire | Modified from Patient Health Questionnaire 9 (PHQ-12) |
| Social well-being      | Social support                                                         | Questionnaire | Developed for UDAY                                    |
| Healthcare utilization | Hospital visits in the past 12 months and health care expenditure      | Questionnaire | CARRS                                                 |

#### Data collection for the provider surveys

Trained research staff visited health facilities located in the aforementioned selected study areas and approached healthcare providers (physicians and pharmacists). Written informed consent was sought and obtained from the individuals prior to data collection and data collection comprised an interviewer administered questionnaire (Table 6).

The physician survey was done among a convenience sample of 50 physicians working in the health facilities located in the selected study areas of Sonipat and Vizag.

Inclusion criteria: We included physicians working in health facilities located in the sampled urban and rural areas of Sonipat and Vizag respectively and were willing to participate and provide informed consent.

Exclusion criteria: Those unwilling to provide informed consent were excluded.

The pharmacist survey was conducted among 350 pharmacists by trained research staff in the aforementioned selected study areas. Written informed consent was sought

and obtained from the individuals prior to data collection and data collection comprised an interviewer administered questionnaire.

Inclusion criteria: We included pharmacists who were located in the sampled urban and rural areas of Sonipat and Vizag respectively, dispensing medicines for diabetes and hypertension, were willing to participate and provide informed consent.

Exclusion criteria: Those not dispensing medicines for diabetes and hypertension and unwilling to provide informed consent were excluded.

**Table 6: Summary of indicators, measures, methods and instruments for the provider survey (physicians)**

| Indicators                                                                                               | Measures                                                                                                      | Methods       | Instruments        |
|----------------------------------------------------------------------------------------------------------|---------------------------------------------------------------------------------------------------------------|---------------|--------------------|
| Socio-demographic details                                                                                | Age, gender, qualification, years of practice, patient load, training in diabetes and hypertension management | Questionnaire | Developed for UDAY |
| Knowledge and practice pertaining to diabetes and hypertension diagnosis and evaluation of complications | Signs and symptoms, diagnosis and cut-off levels for diagnosis, evaluation for complications                  | Questionnaire | Developed for UDAY |
| Treatment practices for diabetes and hypertension                                                        | Lifestyle modifications, prevention and management of                                                         | Questionnaire | Developed for UDAY |

|  |                                                                   |  |  |
|--|-------------------------------------------------------------------|--|--|
|  | complications,<br>names of<br>medicines<br>prescribed<br>commonly |  |  |
|--|-------------------------------------------------------------------|--|--|

### Data collection for the health facility survey

Permission was sought and obtained from respective district medical/health officers prior to data collection and data collection comprised an interviewer administered questionnaire (Table 7). Trained research staff visited public healthcare facilities located in the aforementioned selected study areas and approached the person/ medical officer in charge.

The facility survey was done in 50 public healthcare facilities (sub-centres, primary and community health centres, taluk/district/tertiary hospitals) situated in the selected study areas of Sonipat and Vizag.

**Table 7: Summary of indicators, measures, methods and instruments for the health facility survey**

| Indicators          | Measures                                                                                                                                                                                                       | Methods       | Instruments                                                                                             |
|---------------------|----------------------------------------------------------------------------------------------------------------------------------------------------------------------------------------------------------------|---------------|---------------------------------------------------------------------------------------------------------|
| Coverage statistics | Types of services offered, number of hours and days services provided per week, population covered, average daily outpatient department (OPD) attendance, number of beds available, status of National program | Questionnaire | Adapted from Service Availability and Readiness Assessment tool (SARA) of the World Health Organization |

|                             |                                                                                                                                                                                                                                        |                          |                                                              |
|-----------------------------|----------------------------------------------------------------------------------------------------------------------------------------------------------------------------------------------------------------------------------------|--------------------------|--------------------------------------------------------------|
|                             | for control and prevention of diabetes, cardiovascular disease and stroke (NPCDCS) implementation                                                                                                                                      |                          |                                                              |
| Recommended manpower list   | Numbers working at District Hospitals, Community Health Centres, Primary Health Centres and Sub-centres against recommended numbers and reasons for lack of recommended personal. Additional manpower required for NCDs                | Checklist, questionnaire | Adapted from Indian Public Health Standards, (IPHS) and SARA |
| Recommended medication list | Availability of medicines at District Hospitals, Community Health Centres, Primary Health Centres and Sub-centres against recommended medicines and reasons for lack for recommended medicines. Additional medicines required for NCDs | Checklist, questionnaire | Adapted from IPHS and SARA                                   |
| Recommended equipment list  | Numbers of equipment available at District Hospitals, Community Health Centres, Primary Health Centres and Sub-centres against recommended                                                                                             | Checklist, questionnaire | Adapted from IPHS and SARA                                   |

|                                                                          |                                                                                                                                                                                                                                                                     |                          |                            |
|--------------------------------------------------------------------------|---------------------------------------------------------------------------------------------------------------------------------------------------------------------------------------------------------------------------------------------------------------------|--------------------------|----------------------------|
|                                                                          | equipment and their functional status.<br>Additional equipment required for NCDs                                                                                                                                                                                    |                          |                            |
| Recommended investigative services list                                  | Investigative services available at District Hospitals, Community Health Centres, Primary Health Centres and Sub-centres against recommended services and reasons for their unavailability.<br>Additional investigative services required for NCDs                  | Checklist, questionnaire | Adapted from IPHS and SARA |
| Recommended activities list                                              | Frequency of recommended activities conducted and methods of conducting at District Hospitals, Community Health Centres, Primary Health Centres and Sub-centres for current diagnosis, treatment and health promotion.<br>Reasons for not conducting the activities | Checklist, questionnaire | Adapted from IPHS and SARA |
| Availability of national guidelines and training of healthcare providers | Availability of national guidelines for diagnosis and management of diabetes, hypertension and CVD and training of healthcare providers in the                                                                                                                      | Questionnaire            | Adapted from IPHS and SARA |

|  |                                                                |  |  |
|--|----------------------------------------------------------------|--|--|
|  | facility to diagnose and manage diabetes, hypertension and CVD |  |  |
|--|----------------------------------------------------------------|--|--|

### Bio-sample collection and storage

Blood samples (in fasting state) were collected in plain, fluoride and EDTA vacutainers (Becton & Dickinson, USA) by trained phlebotomists in households or in camps arranged close to the households. Samples for estimation for blood glucose were kept in ice and transferred to laboratories within 2 hours of sample collection and immediately centrifuged. Samples were centrifuged at 2500 rpm for 15 minutes and serum / plasma were transferred into the cryo-vials which were stored in 20°C immediately. Buffy coat from EDTA vacutainers were separated and stored into cryo-vials for DNA extraction. Red blood cells were washed thrice with normal saline and were stored for analysis of fatty acids in future. First early morning voided urine was collected from the participants and has been stored in deep freezer for future analysis of metabolites. All these samples were transported to the biochemistry laboratory at the Public Health Foundation of India (PHFI) in dry-ice on the day of collection from Sonipat and Vizag, where they were stored at -80°C.

All clinical chemistry parameters were analyzed on autoanalyzer Cobas 311 using reagents from Roche Diagnostics, Switzerland. Glucose was estimated using Hexokinase method, cholesterol by enzymatic cholesterol oxidase method, triglycerides by GPO-PAP method & HDL and LDL by direct method, AST & ALT was estimated according to IFCC without pyridoxal phosphate, bilirubin total by Diazonium ion method,



1  
2  
3 bilirubin direct by Diazo with sulphanic acid method, urea by kinetic method, creatinine  
4  
5 by Jaffe's method, and urinary microalbumin using immuno turbidimetric method.  
6  
7 HbA1c was assayed by hplc method using reagents from Bio-Rad Laboratories,  
8  
9 Hercules, CA.  
10

11  
12 Two levels of internal controls were run with every batch of samples. The intra assay  
13  
14 and inter assay coefficient of variation for all the parameters were <3% and <5 %  
15  
16 respectively.  
17

18  
19 The biochemistry laboratory is part of External Quality Assurance program from RIQAS  
20  
21 for clinical chemistry parameters and HbA1c assay.  
22  
23  
24  
25

### 26 **Evaluation of cost-effectiveness**

27  
28 This will be evaluated by assessing the costs and benefits of the multi-component,  
29  
30 multi-level comprehensive interventions in improving diabetes related health outcomes.  
31  
32 Data on healthcare utilization and costs, as well as that of out of pocket expenditure will  
33  
34 be collected in the baseline and end line surveys. In addition, data on direct costs  
35  
36 including the cost of personnel, provider training, medications, lab tests and supplies,  
37  
38 screening, outpatient visits, and costs related to the social marketing campaign will be  
39  
40 obtained during the implementation process. The total costs entailed to identify a person  
41  
42 with diabetes as well as to appropriately treat that person to recommended targets  
43  
44 based on guidelines will be measured. In addition, we will model the costs accrued from  
45  
46 the use of drugs and other related interventions, based on results of other such  
47  
48 comprehensive programs and do a comparison to assess effectiveness. Based on the  
49  
50 aforesaid indicators, we will develop a comprehensive cost-effectiveness model to  
51  
52 assess the overall program effectiveness.  
53  
54  
55  
56  
57  
58  
59  
60

Geographical Information System (GIS) based mapping of study households and neighborhood built environment

All households as well as the study areas, including various points of interest as indicated below were geocoded using GIS mapping. This will be used to comprehensively assess the built environment and its impact on diabetes hypertension and risk factors. GIS based techniques will be employed to study the association between built environment (BE) features and diabetes, hypertension and related risk factors.

Specially trained field staff visited all participant households and used handheld Garmin™ GPS receivers to capture GPS locations of the households. The captured GPS coordinates were verified using Google Earth to see if the locations matched the actual locations.

Table 8 below shows the built environment features from the study areas that were located and mapped.

**Table 8: Characteristics of the built environment in study sites**

| Environment features  | Points of interest                                             | N   | Sonipat | Vizag |
|-----------------------|----------------------------------------------------------------|-----|---------|-------|
| Healthcare facilities | Government hospitals                                           | 64  | 36      | 28    |
|                       | Private hospitals & clinics                                    | 228 | 147     | 81    |
|                       | Registered medical practitioners and unqualified practitioners | 220 | 195     | 25    |
|                       | Other health professionals                                     | 120 | 115     | 3     |
|                       | Pharmacies                                                     | 337 | 224     | 113   |

|                         |                                             |     |     |     |
|-------------------------|---------------------------------------------|-----|-----|-----|
|                         | Medical laboratories                        | 46  | 30  | 16  |
| Food outlets            | Hotels                                      | 162 | 4   | 161 |
|                         | Restaurants                                 | 33  | 10  | 23  |
|                         | Small eateries                              | 97  | 40  | 57  |
|                         | Provision / department stores               | 313 | 196 | 117 |
|                         | Fruit / vegetable / juice outlets           | 254 | 36  | 218 |
|                         | Meat / fish shops                           | 128 | 24  | 104 |
|                         | Public distribution system<br>(ration)shops | 52  |     | 52  |
|                         | Milk outlets                                | 126 | 344 | 122 |
|                         | Bakeries/ sweet shops                       | 106 | 56  | 50  |
| Tobacco outlets         | Pan shop                                    | 713 | 17  | 696 |
| Alcohol outlets         | Authorized government outlets               | 45  | 31  | 14  |
|                         | Unauthorized alcohol outlets                | 100 |     | 100 |
| Recreational facilities | Parks                                       | 91  | 62  | 29  |
|                         | Walking tracks                              | 6   |     | 6   |
|                         | Play grounds                                | 50  | 43  | 7   |
|                         | Fitness / yoga centers                      | 10  | 6   | 4   |
| Other                   | Anganwadis, schools, temples                | 633 | 124 | 509 |
|                         | etc.                                        |     |     |     |

Household GPS locations and neighborhood BE features were integrated with participant data collected as part of the baseline data collection. An overview of the GIS mapping is provided in Figure 5. Area boundaries were obtained from government

1  
2  
3 records and digitized. All spatial data was integrated into a spatial database and  
4  
5 ArcGIS™ software will be used to carry out following spatial analysis methods.  
6  
7

- 8 • Distance calculations: distance between participant households and features of  
9 interest such as health care facilities, food and alcohol outlets, parks etc. and  
10 their association between CMD and risk factors.  
11  
12
- 13 • Spatial aggregation: Aggregation of features such as number of food outlets,  
14 parks etc. in the neighbourhood and relationship with CMD and risk factors.  
15  
16
- 17 • Clustering: Identify clustering of CMD and risk factors (hotspots) and determine if  
18 disease clusters are of sufficient geographic size and concentration to have not  
19 occurred by chance.  
20  
21
- 22 • Spatial smoothing and interpolation: Used to derive a spatial surface from  
23 sampled data points (filling in where data are unobserved) or to smooth across  
24 polygons (aggregate data) to create more robust estimates.  
25  
26
- 27 • Spatial regression: Use of Spatial regression methods such as Geographically  
28 weighted regression ( GWR) to further understand the relationship between built  
29 environment and CMD risk factors as standard statistical regression models,  
30 which assume independence of the observations, are not appropriate for  
31 analysing spatially dependent data.  
32  
33  
34  
35  
36  
37  
38  
39  
40  
41  
42  
43  
44

45 **Figure 5: GIS mapping overview (insert here)**  
46  
47  
48

49 Data management  
50

51 Data were collected in electronic format using customized android based software on a tablet  
52 platform and uploaded to server on a real time basis (Figure 6). For ensuring quality control, all  
53 validation, range and logical checks were in-built in the software. Error reports were generated  
54 bi-weekly and sent to the study sites for rectification. Errors were checked against completion of  
55  
56  
57  
58

1  
2  
3 the questionnaire, identifiers and adherence to the sampling strategy of interviews (only one  
4 man and one woman from single household).  
5

6  
7 Further, site research teams identified any other issues and reported to centralized team for the  
8 corrections. Data correction took place concomitantly with the conduct of the baseline survey.  
9  
10 Similarly, bio-sample reports were matched with participant questionnaires and the final data  
11 was locked after all matching, and rectification of errors.  
12  
13  
14  
15

### 16 **Figure 6: Data collection and management pathway (insert here)**

17

#### 18 Analysis plan

19

20  
21 Data were entered into a database designed specifically for the project, housed at PHFI  
22 and accessible only to investigators and designated study staff. Data will be analysed  
23  
24 using Stata/SE version 10.1 for windows software. Descriptive statistics will be done  
25  
26 and the data expressed as frequencies and percentages for categorical variables and  
27  
28 means and standard deviations for normally distributed continuous variables or inter-  
29  
30 quartile ranges otherwise. Differences between gender groups, age groups, socio-  
31  
32 economic groups, study sites, time periods and individual hypotheses will be tested  
33  
34 using appropriate analytical statistical tests (Chi-square tests for categorical variables, t-  
35  
36 tests continuous variables, multiple linear regression for continuous variables, and  
37  
38 multiple logistic regression for categorical variables). Stratified analysis will be done to  
39  
40 assess for potential confounding and effect modification by other variables. A p-value of  
41  
42 < 0.05 will be considered to indicate statistical significance. Multi-level modelling will be  
43  
44 undertaken by clusters and households as potential levels.  
45  
46  
47  
48  
49  
50  
51  
52  
53

#### 54 **Discussion**

55  
56  
57  
58  
59  
60

1  
2  
3 UDAY is one of the largest community based intervention studies established in India to  
4  
5 implement and evaluate a multi-component, multi-level, cost-effective, comprehensive  
6  
7 intervention program to concomitantly improve the prevention, detection and optimal  
8  
9 management of diabetes and hypertension, which together constitute the leading NCDs  
10  
11 in India. Their high and rising burden coupled with huge healthcare costs underlines the  
12  
13 need for cost-effective community based approaches supplemented by measures to  
14  
15 strengthen the health system to address both these NCDs effectively as envisaged in  
16  
17 UDAY.  
18  
19

20  
21 Most of the evidence on community interventions for chronic NCDs are from developed  
22  
23 countries [12-13]. In the last two decades some evidence has emerged from developing  
24  
25 countries as well but not quite commensurate to the disproportionate burden borne by  
26  
27 them (80% NCD mortality) [14-15]. This is due to several reasons including resources to  
28  
29 conduct such large projects as well as the technical capacity [14,15]. However,  
30  
31 available information indicates that results are likely better in developing countries (e.g.  
32  
33 Isfahan Healthy Heart Program in Iran, diabetes prevention programs in China and  
34  
35 India) [14-16]. We have taken into account findings of such prior research and  
36  
37 attempted to address the reported gaps by adding relevant elements to the design of  
38  
39 our study. For instance, most such intervention programs have entailed community  
40  
41 based interventions (largely targeting lifestyle modification) but have not had active  
42  
43 healthcare system and advocacy interventions as proposed in our study. In addition,  
44  
45 many of the diabetes prevention programs have targeted high risk groups and not the  
46  
47 general free living population as envisaged in this program. Further, we have used  
48  
49 several innovations (see table 1) including task shifting/sharing of care to non-physician  
50  
51 health workers by the extensively leveraging low-cost m-health technology to enable  
52  
53  
54  
55  
56  
57  
58  
59  
60

1  
2  
3 and empower them to screen and deliver interventions as well as physicians to treat  
4 patients as per evidence based algorithms. We have also used GIS mapping to  
5  
6 characterize the sites, built environment, healthcare facilities and providers to examine  
7  
8 the influence of built environment on diabetes/hypertension and their risks factors as  
9  
10 well as care pathways that patients undertake, in order to deliver interventions in a more  
11  
12 focused way. In addition, we have built in extensive stakeholder and community  
13  
14 engagement in the study implementation which should aid in improving acceptability  
15  
16 and buy in for the intervention program.  
17  
18  
19

20  
21 Further, the community based cohorts established will not only facilitate tracking of the  
22  
23 trends in risk factors and diseases in rapidly transitioning populations in India, but also  
24  
25 serve as well characterized population platforms for embedding and evaluating new  
26  
27 research questions of public health relevance in combating the rise of NCDs.  
28  
29

30  
31 Notably, a unique strength of UDAY besides occurring in a developing country setting  
32  
33 where there are limited community based projects, in comparison to various other  
34  
35 community based projects conducted in both developed and developing countries,  
36  
37 which have either addressed prevention or management of select chronic conditions, is  
38  
39 that UDAY aims to address both prevention and management of concurrently and  
40  
41 comprehensively.  
42  
43

44  
45 However, the study has some limitations. Firstly, we used a pre-post study design for  
46  
47 evaluating the effect of our interventions. Though, a randomized controlled trial is a  
48  
49 better design to evaluate the effectiveness of interventions, providing a higher level of  
50  
51 evidence than a pre-post design, to study the effect of multi-component interventions  
52  
53 delivered at multiple levels in a comprehensive manner in a large population over a vast  
54  
55 geographic area, we considered the pre-post design as more appropriate for our study.  
56  
57  
58

1  
2  
3 Further, we also wanted to understand and examine the operational part of the program  
4 implementation to gain insights into underpinning factors behind success or failure that  
5  
6 can inform possible replication and scale up in the future.  
7  
8

9  
10 Secondly, our study does not include controls for the comparison. Given the size of the  
11 population covered by the interventions, we would have had to recruit control  
12  
13 communities of similar size and numbers, which wasn't feasible from an implementation  
14 and resources availability point of view. However, our baseline and end line surveys that  
15 evaluate the impact are done on independent random samples of the population, which  
16  
17 should provide robust data regarding potential changes over baseline in the levels of:  
18  
19 public awareness and knowledge about diabetes and hypertension; those aware,  
20  
21 diagnosed, treated and controlled to recommended targets; the use of guideline based  
22  
23 management by providers leading to improved health outcomes and access to  
24  
25 healthcare for people living with diabetes and hypertension in India. In addition, we will  
26  
27 be comparing our results with ongoing national survey data on NCDs and their risk  
28  
29 factors (National Family Health Survey, Annual Health Survey, District Level Household  
30  
31 Survey) as well as a New National NCD survey which is being implemented currently.  
32  
33 This will help assess secular trends and evaluate our findings in conjunction with such  
34  
35 trends if any. Also we did not account for the regression to the mean as there would be  
36  
37 at least some people both in the end line and baseline. We will do sensitivity analysis to  
38  
39 explore this bias.  
40  
41  
42  
43  
44  
45  
46  
47  
48

49 Thirdly, one of the major interventions of our program is to implement a community  
50 based screening, follow-up and educational program through health workers. We  
51 specifically hired and trained health workers to implement this interventional component,  
52  
53 which might add to the cost of implementing a community based diabetes and  
54  
55  
56  
57  
58  
59  
60



1  
2  
3 hypertension prevention and management program. However, the additional cost of is  
4 likely to be minimal as indicated by previous modelling estimates of training and using  
5 health workers.  
6  
7  
8  
9

10 Fourthly, we are using multi-component interventions at multiple levels (health  
11 promotion campaigns, health workers led home based screening, follow-up and  
12 education, training of healthcare providers, registry for facility based improvement in  
13 quality of care, patient networks and advocacy to strengthen the health system) which  
14 makes it difficult to evaluate the individual contribution of each intervention. However,  
15 the purpose is to deliver it in a comprehensive manner to improve outcomes, which to  
16 our knowledge has hitherto not been implemented in similar settings, and not to tease  
17 out impact of individual interventions in a milieu where many individuals have elevations  
18 of multiple NCD risk factors and suffer often from co-morbid conditions that require to be  
19 addressed comprehensively.  
20  
21  
22  
23  
24  
25  
26  
27  
28  
29  
30  
31  
32

33 It is anticipated that the results obtained from the study will inform policy makers on the  
34 most appropriate community and health system based approaches that are effective in  
35 stemming the rising burden of diabetes and hypertension in India and countries with  
36 similar challenges.  
37  
38  
39  
40  
41  
42  
43  
44  
45  
46  
47  
48  
49  
50  
51  
52  
53  
54  
55

## 56 **Data sharing and Contributorship statement**

57  
58  
59  
60

1  
2  
3 Data will be available to the study investigators only. De-identified data can be shared  
4  
5 with other researchers based on specific request to the publication sub-committee of the  
6  
7 project with potential research questions to be examined.  
8  
9

10  
11  
12 Sailesh Mohan, K. Srinath Reddy, Dorairaj Prabhakaran and Nikhil Tandon conceived  
13  
14 the study. Sailesh Mohan wrote the first draft of the manuscript. Prashant Jarhyan,  
15  
16 Shreeparna Ghosh, Nikhil Srinivasapura Venkateshmurthy, Ritu Rana, Cheena  
17  
18 Malhotra, Ruby Gupta, Bhaskara Rao and Sanjay Kalra wrote specific sections of the  
19  
20 manuscript as well as contributed to the design and implementation of the study.  
21  
22  
23 Bhaskara Rao and Sanjay Kalra also coordinate the activities in the study sites and  
24  
25 provide technical support. Sailesh Mohan, Shreeparna Ghosh, Prashant Jarhyan, and  
26  
27 Nikhil Srinivasapura Venkateshmurthy contributed to the collection and assembly of  
28  
29 data. All authors provided input into the study design, as well as provided critical  
30  
31 intellectual input for revision of the manuscript and approved the final version of the  
32  
33 manuscript.  
34  
35  
36  
37  
38  
39

### 40 **Acknowledgements**

41  
42 The UDAY project is led by the Public Health Foundation of India, Gurgaon, India in  
43  
44 collaboration with Population Services International, India and Project HOPE. We  
45  
46 acknowledge the contributions of the field and research staff of the project. The funder  
47  
48 has no role in the design, implementation, and evaluation of the project as well as in the  
49  
50 writing of this paper. All contents of this paper are solely the responsibility of the  
51  
52 authors.  
53  
54

### 55 **Funding source**

1  
2  
3 It is supported by an unrestricted educational grant from Eli Lilly and Company under  
4 the Lilly NCD Partnership Program.  
5  
6

7  
8 **Disclaimer**  
9

10 The funding agency had no role in the design, conduct or analysis of the study, and no  
11 role in the decision to submit the protocol for publication.  
12  
13

14 **Conflicts of interest**  
15

16 None declared  
17  
18  
19  
20  
21  
22  
23  
24  
25  
26  
27  
28  
29  
30  
31  
32  
33  
34  
35  
36  
37  
38  
39  
40  
41  
42  
43  
44  
45  
46  
47  
48  
49  
50  
51  
52  
53  
54  
55

56 **References**  
57  
58  
59  
60

1. National Multisectoral Action Plan for Prevention and Control of NCDs in India. World Health Organization (WHO) Country Office for India, New Delhi, 2013.
2. International Diabetes Federation. IDF Diabetes Atlas, 7th edition. 7th ed. Brussels, Belgium: International Diabetes Federation, 2015.
3. Reddy KS, Shah B, Varghese C, et al. Responding to the threat of chronic diseases in India. *Lancet* 2005; 366:1744-49.
4. Mohan S, Koller T. Hypertension and related comorbidities in India: Implications for the health system. World Health Organization (WHO) Country Office for India, New Delhi, 2013.
5. Nair M, Ali MK, Ajay VS, et al. CARRS Surveillance study: design and methods to assess burdens from multiple perspectives. *BMC Public Health* 2012;12:701.
6. Reddy KS, Prabhakaran D, Chaturvedi V, et al. Methods for establishing a surveillance system for cardiovascular diseases in Indian industrial populations. *Bull World Health Organ* 2006; 84:461-69.
7. International Institute for Population Sciences (IIPS) and Macro International. 2007. National Family Health Survey (NFHS-3), 2005–06: India: Volume II. Mumbai: IIPS.
8. World Health Organization. Global Physical Activity Questionnaire (GPAQ) Analysis Guide: World Health Organization. Available at: [http://www.who.int/chp/steps/resources/GPAQ\\_Analysis\\_Guide.pdf](http://www.who.int/chp/steps/resources/GPAQ_Analysis_Guide.pdf) (Assessed 15 December 2015)
9. Yusuf S, Hawken S, Ounpuu S, et al. Effect of potentially modifiable risk factors associated with myocardial infarction in 52 countries (the INTERHEART study): case-control study. *Lancet* 2004; 364:937-52.
10. EuroQol Group. EuroQol--a new facility for the measurement of health-related quality of life. *Health Policy* 1990; 16:199–208.
11. Poongothai S, Pradeepa R, Ganesan A, et al. Reliability and validity of a modified PHQ9 item inventory (PHQ12) as a screening instrument for assessing depression in Asian Indians (CURES—65). *J Assoc Physicians India* 2009; 57: 147–52.
12. Berra K, Franklin B, Jennings C. Community-Based Healthy Living Interventions. *Prog Cardiovasc Dis* 2017; 59:430-439.
13. Puska P. Why Did North Karelia-Finland Work? Is it Transferrable? *Glob Heart* 2016; 11:387-391.
14. Sarrafzadegan N1, Kelishadi R, Esmailzadeh A, Mohammadifard N, Rabiei K, Roohafza H, Azadbakht L, Bahonar A, Sadri G, Amani A, Heidari S, Malekafzali H. Do lifestyle interventions work in developing countries? Findings from the Isfahan Healthy Heart Program in the Islamic Republic of Iran. *Bull World Health Organ* 2009;87:39-50.
15. Harati H, Hadaegh F, Momenan AA, Ghanei L, Bozorgmanesh MR, Ghanbarian A, Mirmiran P, Azizi F. Reduction in incidence of type 2 diabetes by lifestyle intervention in a middle eastern community. *Am J Prev Med* 2010; 38:628-636.
16. Rawal LB, Tapp RJ, Williams ED, Chan C, Yasin S, Oldenburg B. Prevention of type 2 diabetes and its complications in developing countries: a review. *Int J Behav Med*. 2012; 19:121-33.

1  
2  
3  
4  
5  
6  
7  
8  
9  
10  
11  
12  
13  
14  
15  
16  
17  
18  
19  
20  
21  
22  
23  
24  
25  
26  
27  
28  
29  
30  
31  
32  
33  
34  
35  
36  
37  
38  
39  
40  
41  
42  
43  
44  
45  
46  
47  
48  
49  
50  
51  
52  
53  
54  
55  
56  
57  
58  
59  
60



40x30mm (300 x 300 DPI)

ew only

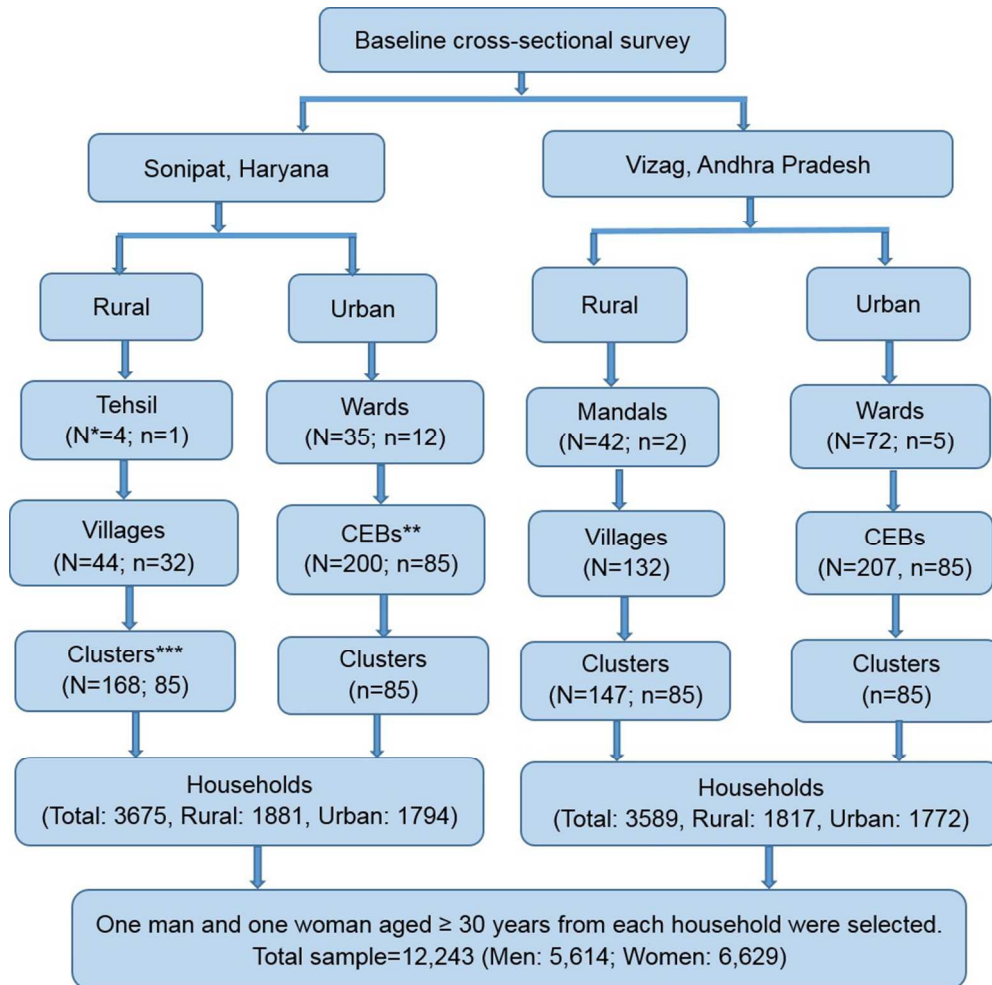

\*N=total, n=number selected

\*\*CEB=Census Enumeration Block

\*\*\*Cluster = In urban sub-site clusters comprise CEBs, in rural sub-site bigger villages were split into 2 or 3 clusters with sizes of 75-300 households.

1  
2  
3  
4  
5  
6  
7  
8  
9  
10  
11  
12  
13  
14  
15  
16  
17  
18  
19  
20  
21  
22  
23  
24  
25  
26  
27  
28  
29  
30  
31  
32  
33  
34  
35  
36  
37  
38  
39  
40  
41  
42  
43  
44  
45  
46  
47  
48  
49  
50  
51  
52  
53  
54  
55  
56  
57  
58  
59  
60



48x33mm (300 x 300 DPI)

Review only



74x48mm (300 x 300 DPI)

view only



1  
2  
3  
4  
5  
6  
7  
8  
9  
10  
11  
12  
13  
14  
15  
16  
17  
18  
19  
20  
21  
22  
23  
24  
25  
26  
27  
28  
29  
30  
31  
32  
33  
34  
35  
36  
37  
38  
39  
40  
41  
42  
43  
44  
45  
46  
47  
48  
49  
50  
51  
52  
53  
54  
55  
56  
57  
58  
59  
60

## UDAY- Priority Ecosystem Interventions

- Surveys to establish baseline and inform specific program design on how to improve populations, patients and providers behaviors; mid and end of program surveys to assess program impact



56x58mm (300 x 300 DPI)



55x49mm (300 x 300 DPI)

only

### Supplementary file

Sonipat district in the state of Haryana, is north of India's capital city Delhi. It covers an area of 2,122 sq. km and has a population of 1,450,001 (Census 2011). The district has 4 tehsils (sub-districts), namely Gohana, Ganaur, Sonipat and Kharkhoda. Among these, we selected Sonipat tehsil as the urban sub-site and Kharkhoda as the rural sub-site.

Vizag district is one of the north eastern coastal district in the state of Andhra Pradesh and lies in proximity to the Bay of Bengal. It covers an area of 11,161 sq. km and has a population of 4,290,589 (Census 2011). Vizag district has 43 mandals (sub-districts) comprising 4 urban mandals and 39 rural mandals. Among these, we selected Vizag as the urban sub-site and Makavarapalem and Nathavaram as the rural sub-site.

# BMJ Open

## UDAY: Protocol of a Comprehensive Diabetes and Hypertension Prevention and Management Program in India

|                                 |                                                                                                                                                                                                                                                                                                                                                                                                                                                                                                                                                                                                                                                    |
|---------------------------------|----------------------------------------------------------------------------------------------------------------------------------------------------------------------------------------------------------------------------------------------------------------------------------------------------------------------------------------------------------------------------------------------------------------------------------------------------------------------------------------------------------------------------------------------------------------------------------------------------------------------------------------------------|
| Journal:                        | <i>BMJ Open</i>                                                                                                                                                                                                                                                                                                                                                                                                                                                                                                                                                                                                                                    |
| Manuscript ID                   | bmjopen-2017-015919.R3                                                                                                                                                                                                                                                                                                                                                                                                                                                                                                                                                                                                                             |
| Article Type:                   | Protocol                                                                                                                                                                                                                                                                                                                                                                                                                                                                                                                                                                                                                                           |
| Date Submitted by the Author:   | 20-Nov-2017                                                                                                                                                                                                                                                                                                                                                                                                                                                                                                                                                                                                                                        |
| Complete List of Authors:       | Mohan, Sailesh; Public Health Foundation of India<br>Jarhyan, Prashant; Public Health Foundation of India<br>Ghosh, Shreeparna; Public Health Foundation of India<br>Srinivasapura Venkateshmurthy, Nikhil; Public Health Foundation of India<br>Gupta, Ruby; Public Health Foundation of India<br>Rana, Ritu; Population Services International India<br>Malhotra, Cheena; Project Hope India<br>Rao, Bhaskara; MaxCure Hospital<br>Kalra, Sanjay; Bharti Hospital Karnal<br>Tandon, Nikhil; All India Institute of Medical Sciences,<br>Reddy, KS; Public Health Foundation of India<br>Prabhakaran, Dorairaj; Public Health Foundation of India |
| <b>Primary Subject Heading</b>: | Epidemiology                                                                                                                                                                                                                                                                                                                                                                                                                                                                                                                                                                                                                                       |
| Secondary Subject Heading:      | Diabetes and endocrinology, Health services research, Public health, Cardiovascular medicine                                                                                                                                                                                                                                                                                                                                                                                                                                                                                                                                                       |
| Keywords:                       | Hypertension < CARDIOLOGY, General diabetes < DIABETES & ENDOCRINOLOGY, EPIDEMIOLOGY                                                                                                                                                                                                                                                                                                                                                                                                                                                                                                                                                               |
|                                 |                                                                                                                                                                                                                                                                                                                                                                                                                                                                                                                                                                                                                                                    |

SCHOLARONE™  
Manuscripts

1  
2  
3 **UDAY: Protocol of a Comprehensive Diabetes and Hypertension Prevention and**  
4  
5 **Management Program in India**  
6  
7  
8  
9

10 Authors: Sailesh Mohan,<sup>1</sup> Prashant Jarhyan,<sup>1</sup> Shreeparna Ghosh,<sup>1</sup> Nikhil  
11  
12 Srinivasapura Venkateshmurthy,<sup>1</sup> Ruby Gupta,<sup>1</sup> Ritu Rana,<sup>2</sup> Cheena Malhotra,<sup>3</sup>  
13  
14 Bhaskara Rao,<sup>4</sup> Sanjay Kalra,<sup>5</sup> Nikhil Tandon,<sup>6</sup> K. Srinath Reddy,<sup>1</sup> Dorairaj  
15  
16 Prabhakaran<sup>1</sup>  
17  
18  
19  
20

21 <sup>1</sup> Public Health Foundation of India, Gurgaon, India  
22

23 <sup>2</sup> Population Services International, Delhi, India  
24

25 <sup>3</sup> Project HOPE, Delhi, India  
26

27 <sup>4</sup> Manipal Hospitals, Visakhapatnam, India  
28

29 <sup>5</sup> Bharti Hospital, Karnal, India  
30

31 <sup>6</sup> All India Institute of Medical Sciences, Delhi, India  
32  
33  
34  
35  
36  
37  
38  
39  
40  
41  
42  
43  
44  
45  
46  
47  
48  
49  
50

51 Corresponding author  
52 Dr. Sailesh Mohan  
53 Additional Professor  
54 Public Health Foundation of India  
55 Email:smohan@phfi.org  
56  
57  
58  
59  
60

## Abstract

### Introduction

Diabetes and hypertension are two leading noncommunicable conditions, which are sub-optimally managed in India. Thus, innovative comprehensive approaches that can concomitantly improve their detection, prevention and control are warranted.

### Methods and analysis

UDAY, a 5-year initiative aims to reduce the risk of diabetes and hypertension and improve management by implementing a comprehensive intervention program in the two selected study sites, Sonipat and Visakhapatnam (Vizag). It has a pre-post evaluation design with representative cross-sectional surveys before and after intervention. Within these two sites, urban and rural sub-sites each with a total population of approximately 1, 00,000 people each were selected and a baseline and post intervention assessment will be conducted deploying 5 surveys [among general population (including body measurements or bio-samples), patients, healthcare providers including physicians and pharmacists, health facilities] which will determine: the knowledge levels about diabetes and hypertension, the proportion treated and controlled; the patient knowledge and self-management skills; healthcare providers' management practices; the level of access and barriers to obtaining care. The interventions will include: tailored health promotion for improving public knowledge; screening of adults aged  $\geq 30$  years for identifying those at high risk of diabetes and/or hypertension for linkage to the healthcare system; patient education using technology enabled community health workers, geographic information system (GIS) based mapping of the communities, healthcare provider training on management guidelines, community based diabetes registry and; advocacy to improve access to healthcare. The baseline surveys have been completed, the study areas mapped using GIS and the interventions are being implemented. UDAY is expected to increase over baseline the levels of: public knowledge about diabetes and hypertension; those treated and controlled; patient self-management skills; the use of guideline based management by providers and; access to healthcare, leading to improved health outcomes and inform development of a India relevant chronic care model.

### Ethics and dissemination

Ethical clearance for conduct of the study was obtained from the Institutional Ethics Committee (IEC) of the Public Health Foundation of India. The findings will be targeted primarily at public health policymakers and advocates, but will be disseminated widely through other mechanisms including conference presentations and peer-reviewed publications, as well as to the participating communities.

### Strengths and limitations of this study

- Unique large community based study in geographically and culturally diverse “real world” settings in India for improving prevention and control of diabetes and hypertension.
- Employs a comprehensive multi-level, multi component intervention approach to target the general population, patients, providers and to strengthen the health system for improving prevention and control of diabetes and hypertension.
- Concomitantly addresses detection, prevention and management of both diabetes and hypertension.
- Extensively leverages mobile technology to enable health workers in task sharing as well as for electronic data capture.
- Quasi experimental design with complex intervention may hinder attribution of specific effect to individual intervention components.

## Introduction

Non-communicable Diseases (NCDs) are currently the leading cause of preventable death and disability in India, accounting for two out of every three deaths [1]. Among NCDs, the prevalence of type-2 diabetes mellitus (DM) and hypertension have been rising rapidly. Currently there are about 69 million people with diabetes, a figure that is projected to further increase to a staggering 124 million by 2040 [2]. The number of individuals with hypertension is projected to increase to 214 million by 2030 from 118 million in 2000 [3,4]. Furthermore, diabetes and hypertension are important risk factors for both the major forms of cardiovascular disease [CVD (coronary heart disease and stroke)], highly prevalent and attributable to nearly half of all the deaths from NCDs [4].

Despite the availability of proven and effective treatments, diabetes as well as hypertension detection and control rates are abysmally low in India with blood pressure control among those with diabetes being even more sub-optimal, with a huge gap between detection and adequate treatment [1,3,4]. Thus, there is great potential and opportunity to reduce the rising burden of diabetes and hypertension as well as the

1  
2  
3 associated vascular risk in India through concomitantly improving their detection,  
4  
5 prevention and control.  
6  
7  
8  
9

10 To address this huge gap in the prevention and management of both these conditions  
11 we are undertaking a 5-year initiative entitled “UDAY” (meaning dawn in *Sanskrit*) in  
12 epidemiologically transitioning communities, that aims to reduce the risk of diabetes and  
13 hypertension and concomitantly improve the management of either conditions by  
14 implementing a comprehensive community based innovative intervention program in the  
15 two geographically and culturally distinct study sites, Sonipat (Haryana, North India) and  
16 Visakhapatnam or Vizag (Andhra Pradesh, South India). This paper describes the  
17 design and methods of UDAY- A Comprehensive Diabetes and Hypertension  
18 Prevention and Management Program In India.  
19  
20  
21  
22  
23  
24  
25  
26  
27  
28  
29  
30  
31  
32

## 33 **Methods**

### 34 Study design

35 UDAY has a pre-post evaluation design with representative cross sectional surveys  
36 before (in year one at baseline, pre-intervention) and after the intervention (in year 5).  
37  
38 The main research question is: whether a multi-component, multi-level, cost-effective,  
39 comprehensive intervention program will improve the prevention, detection and optimal  
40 management of diabetes and hypertension in the two selected study sites. Ethical  
41 clearance for conduct of the study was obtained from the Institutional Ethics Committee  
42 (IEC) of the Public Health Foundation of India.  
43  
44  
45  
46  
47  
48  
49  
50  
51  
52

53 We selected a pre-post evaluation design due to the following reasons. We wanted to  
54 evaluate if multi-component interventions delivered at multiple levels in a  
55  
56  
57  
58  
59  
60



1  
2  
3 comprehensive manner can improve outcomes. Further, we also wanted to understand  
4 and examine the operational part of the program implementation to gain insights into  
5  
6 underpinning factors behind success or failure that can inform possible replication and  
7  
8 scale up in the future. The options for an implementation study of this nature with  
9  
10 process outcomes are either a pre-post design or quasi-experimental design or step  
11  
12 wedge design. We deemed a step wedge to be too complicated for this evaluation and  
13  
14 given that quasi experimental design would not have enough power to decipher real  
15  
16 differences, we chose a pre-post design. This was also aimed at cutting down costs.  
17  
18 At baseline, in year one, 5 surveys were conducted among the general population,  
19  
20 among patients, among healthcare providers including physicians and pharmacists and  
21  
22 in health facilities to guide intervention development and impact assessment. Similar  
23  
24 assessment is planned after the intervention, in year 5.  
25  
26  
27  
28  
29  
30  
31  
32

33 The specific objectives these assessments are to:

- 34  
35 1. Determine the prevalence, awareness, the knowledge levels about diabetes and  
36  
37 hypertension, the proportion treated and controlled among a representative  
38  
39 sample (n=12000) of adults aged  $\geq 30$  years in the selected study areas.  
40  
41 (Population survey)  
42  
43
- 44  
45 2. Determine the patient knowledge levels and self-management skills among a  
46  
47 convenience sample (n=400) of those diagnosed with diabetes and hypertension  
48  
49 in the selected study areas. (Patient survey)  
50  
51
- 52  
53 3. a) Determine healthcare providers' (physicians) knowledge and practices related  
54  
55 to diabetes and hypertension management among a convenience sample (n=50)  
56  
57 of healthcare providers' in the selected study areas.  
58  
59  
60

1  
2  
3 b) Determine pharmacists' knowledge related to diabetes and hypertension and  
4 dispensing practices among a convenience sample of pharmacists (n=350)  
5  
6  
7 (Provider survey)  
8  
9

10 4. Determine the level of access and potential barriers to diabetes and hypertension  
11 care provided by the public healthcare system in the selected study areas (n=50).  
12  
13 (Facility survey)  
14  
15

16  
17 5. Determine the cost-effectiveness of the intervention program in improving  
18 diabetes and hypertension treatment and management outcomes in the study  
19 areas. (Using population survey, GIS data and project implementation data)  
20  
21  
22  
23  
24  
25

## 26 Study sites

27  
28 We are undertaking this comprehensive diabetes prevention and management program  
29 in two epidemiologically transitioning areas located in Sonipat in Haryana and Vizag in  
30 Andhra Pradesh (Figure 1, supplementary file).  
31  
32  
33  
34  
35  
36  
37

### 38 **Figure 1: Study sites (insert here)**

39  
40  
41  
42 We defined the areas and their sub-areas using the following terminology:

- 43  
44 • Sites – a bounded geographic area within which we have defined distinct rural  
45 and urban sub-sites for the study. Each site has been defined such that it  
46 contains approximately 2,00,000 people. Sonipat and Vizag are each a site.  
47  
48
- 49 • Sub-sites – within each site, we have defined one rural and one urban sub-site  
50 for study. Each sub-site is geographically bounded, and contains a population of  
51  
52  
53  
54  
55  
56  
57  
58  
59  
60

approximately 1,00,000. Within Sonipat and Vizag, we have defined two sub-sites each (rural and urban).

- Total project – the total project is the summation of the two sites, including the four sub-sites (two sub-sites within each site). Therefore the total population under the study is approximately 4,00,000.

### Intervention program

We propose to implement a priority set of synergistic innovative ecosystem interventions (Figure 2, Table 1), with the overarching goal to prevent, detect, reduce the risk of diabetes and hypertension and to improve the treatment and management of individuals with either of the conditions in the study sites. We hypothesize (Figure 3) that education of the public on diabetes, hypertension and related risks will lead to increased self-referral and prevention, while education of the healthcare providers will promote opportunistic screening for diabetes, hypertension and related risks, and purposeful implementation of evidence based diagnostic (to screen, stratify by risk) and management guidelines (to initiate appropriate therapy).

### **Figure 2: Priority interventions in UDAY (insert here)**

**Table 1: Innovations in UDAY**

| <b>Intervention domain</b>               | <b>Approach</b>                                 | <b>Target</b>        |
|------------------------------------------|-------------------------------------------------|----------------------|
| Prevention, early detection and referral | Culturally tailored health promotion, screening | 400,000 population   |
| Capacity building, task                  | CME, short trainings,                           | Healthcare providers |

|                                                                           |                               |                  |
|---------------------------------------------------------------------------|-------------------------------|------------------|
| shifting of healthcare providers                                          | distance learning, QIP        |                  |
| Early diagnosis and prevention of complications                           | Registry                      | 10,000 patients  |
| m-health system                                                           | Electronic data system +DSS   | Adult population |
| Electronic data capture                                                   | Tablet based surveys          | 12,000           |
| Spatial and built environment assessment                                  | GIS mapping                   | All study areas  |
| Improved access to medicines by social marketing initiatives              | Improving quality of services | 300 pharmacists  |
| Culturally tailored patient education and networks for enabling self-care | Utilizing health workers      | Patients         |

**Figure 3: Intervention framework (insert here)**

Following the baseline assessments a comprehensive intervention program is being currently implemented. The intervention components includes:

1. tailored health promotion using social marketing approaches for increasing public awareness and promoting population risk factor modification and reduction;
2. community based screening of all adults aged  $\geq 30$  years for identifying those at high risk of diabetes and/or hypertension or with disease to link to the healthcare system leveraging task-sharing approaches utilizing technology enabled health workers;
3. patient education using technology enabled health workers,
4. healthcare provider training on evidence based management guidelines,
5. implementation of a quality improvement program and diabetes registry and;

- 1  
2  
3 6. advocacy with governments and other stakeholders to improve access to  
4  
5 healthcare.  
6  
7  
8  
9

10 It is expected that the comprehensive interventions will increase over baseline the levels  
11 of: public awareness and knowledge about diabetes and hypertension; those aware,  
12 diagnosed, treated and controlled to recommended targets; the use of guideline based  
13 management by providers. Detailed outcome assessment metrics is provided in table 2.  
14  
15 This is anticipated to improve health outcomes and access to healthcare for people  
16 living with diabetes and hypertension in India as well as provide a model of healthcare  
17 which is low-cost, community based and context relevant in a milieu of rapid rise in  
18 these chronic conditions.  
19  
20  
21  
22  
23  
24  
25  
26  
27  
28  
29  
30  
31  
32  
33  
34

35 **Table 2: Assessment of intervention outcomes**  
36  
37

| Indicator           | Target Population                  | Metric                                                                                                                             | Evaluation Methodology                          |
|---------------------|------------------------------------|------------------------------------------------------------------------------------------------------------------------------------|-------------------------------------------------|
| 1. Patient outcomes | Diabetes and hypertension patients | % implementing lifestyle change (meet the recommended levels of physical activity, and intend to and/or implement dietary changes) | Baseline and endline surveys, diabetes registry |
|                     |                                    | % engaging in self-monitoring/testing                                                                                              | Baseline and endline surveys, diabetes registry |
|                     |                                    | % increase in correct self-management practices                                                                                    | Baseline and endline surveys, diabetes registry |
|                     |                                    | % increase in knowledge on diabetes and hypertension                                                                               | Baseline and endline surveys, diabetes registry |

|                                                            |                                  |                                                                                                                                     |                                                                                |
|------------------------------------------------------------|----------------------------------|-------------------------------------------------------------------------------------------------------------------------------------|--------------------------------------------------------------------------------|
|                                                            |                                  | % of patients on treatment, whose diabetes, hypertension is successfully controlled, i.e., HbA1C $\leq$ 7% / BP $\leq$ 130/80 mm Hg | Baseline and endline surveys, diabetes registry                                |
| 2. Awareness and knowledge about diabetes and hypertension | General population               | % increase in knowledge of diabetes, hypertension and their risk factors                                                            | Baseline and endline surveys                                                   |
|                                                            |                                  | % increase in detection rate and in seeking healthcare                                                                              | Baseline and endline surveys, screening program                                |
|                                                            |                                  | % implementing lifestyle change (meet the recommended levels of physical activity, and intend to and/or implement dietary changes)  | Baseline and endline surveys, screening program                                |
|                                                            |                                  | % exposed to health promotion campaign                                                                                              | Baseline and endline surveys, screening program                                |
| 3. Provider knowledge and practices                        | Physicians, other health workers | # who participate in training programs                                                                                              | Training participation data                                                    |
|                                                            |                                  | % increase in knowledge related to diabetes and hypertension management                                                             | Baseline and endline surveys of providers, diabetes registry                   |
|                                                            |                                  | % increase in practices related to diabetes and hypertension management and providing lifestyle advice                              | Baseline and endline surveys of providers, diabetes registry                   |
|                                                            | Pharmacists                      | % of pharmacists who identify people at risk of and with diabetes, hypertension                                                     | Baseline and endline surveys of providers                                      |
|                                                            |                                  | % increase in pharmacists dispensing and filling prescriptions correctly                                                            | Baseline and endline surveys of providers, diabetes registry                   |
| 4. Program cost-effectiveness                              | Diabetes patients                | Cost per diabetic patient treated to recommended target                                                                             | Baseline and endline surveys of patients, program cost data, diabetes registry |
|                                                            |                                  | % reduction in out of pocket expenditure                                                                                            | Baseline and endline surveys of patients, diabetes registry                    |
|                                                            | General population               | Cost per diabetes case identified                                                                                                   | Surveys, screening program, program cost data                                  |

|                        |                   |                                                                                      |                                                                              |
|------------------------|-------------------|--------------------------------------------------------------------------------------|------------------------------------------------------------------------------|
| 5. Access to treatment | Healthcare system | Improvements in access to and availability of medications                            | Baseline and endline surveys of patients, facility survey, diabetes registry |
|                        |                   | % increase in the proportion patients who report that medicines are easily available | Baseline and endline surveys of patients, facility survey, diabetes registry |
|                        |                   | % reduction in stock outs of medicines                                               | Baseline and endline surveys of patients, facility survey, diabetes registry |
|                        |                   | Adherence to IPHS guidelines on drugs, services                                      | Facility survey, diabetes registry                                           |

### Intervention development

We used evidence based interventions and leveraged the results from the baseline surveys (population, patient, facility and providers) to develop and refine the interventions, which were subsequently piloted. For example, from population survey we found that there were differences in the awareness of risk factors for developing diabetes/hypertension across rural/urban areas and the two study sites in North and South India. Therefore, taking this into cognizance, we designed the tailored health promotion program and messages to be delivered by trained health workers to increase awareness about the risk factors. Facility and providers' surveys helped us to design the training programs for training healthcare providers as well as to conduct advocacy to improve access to the health system. Similarly, findings from the patients' survey helped us to focus the training of health workers on building self-management skills of people with diabetes/hypertension and for developing patient networks.

### Sample for the population survey

We based our sample size calculation on the prevalence of diabetes, which has a lower prevalence than hypertension, in previously reported studies in India. Anticipating a response rate of 85 % with a design effect factor of 1.5 (to account for cluster sampling, and a confidence level of 1.96, the sample size estimates were generated for males and females in three age strata (30-49, 50-69, 69 and above) in each setting (urban, rural). About 2968 subjects was estimated to be required per urban sub-site (Sonipat and Vizag) and 2942 subjects per rural sub-site (Sonipat and Vizag). The total estimated sample was 11820, which was increased to 12000 to obtain equal samples in both urban and rural areas. Sample weights were generated for estimating the prevalence of diabetes, hypertension and related cardiometabolic risk factors at the district level.

### Survey sampling and participant selection

#### Population survey

Two representative population based cross sectional surveys with independent samples and identical methodologies at baseline and at the end of intervention will be conducted, that will provide estimates of the burden and changes in the prevalence of diabetes, hypertension, and related cardiometabolic risk factors. In addition, those recruited for the first survey at baseline (which has been completed), will be followed up as a cohort to estimate the incidence of new cardio-metabolic (CMD) risk factors, disease, healthcare utilization, diabetes and hypertension related morbidity and mortality.



1  
2  
3 The first population survey (baseline survey) was done among a representative sample  
4 of adults aged  $\geq 30$  years residing in the selected study areas of Sonipat and Vizag.

5  
6 Inclusion criteria – a) adults aged  $\geq 30$  years residing in the sampled urban and rural  
7 areas of Sonipat and Vizag respectively. b) willing to participate and provide informed  
8 consent.  
9

10  
11 We excluded individuals who were unwilling to provide informed consent and those with  
12 serious chronic illnesses [such as that of the liver (cirrhosis), kidneys (renal failure) or  
13 malignancies], pregnant women.  
14

15  
16 For the baseline survey, a multistage random sampling technique was deployed to  
17 obtain a representative sample of adults aged  $\geq 30$  years, using data from the most  
18 recent census of 2011. In addition, a manual enumeration and mapping of all  
19 households and structures was conducted in all the study areas [all census enumeration  
20 blocks (CEBs) in urban areas and villages in rural], to identify households and  
21 structures constructed since the last census (Table 3). CEBs are considered as the  
22 primary sampling unit in urban areas and villages in the rural areas respectively. On  
23 average, about 100-125 households with a population of 650-700 persons would  
24 generally constitute a CEB. This enabled a complete sampling frame for the selection of  
25 households for the survey and thus provided an equal chance of selection to each  
26 household. Besides, it also helped identify potential recipients of the intervention  
27 program (i.e., adults aged  $\geq 30$  years) in the study sites.  
28

29  
30 In each sub-site, 85 clusters were randomly selected (urban Sonipat: 85/200 CEBs,  
31 urban Vizag: 85/207 CEBs and rural Sonipat: 85/168 clusters, rural Vizag: 85/147  
32 clusters) according to probability proportional to size (Figure 4). In rural sub-sites, bigger  
33  
34  
35  
36  
37  
38  
39  
40  
41  
42  
43  
44  
45  
46  
47  
48  
49  
50  
51  
52  
53  
54  
55  
56  
57  
58  
59  
60

villages were divided into clusters with 75 to 300 households. From each cluster in the urban and rural sub-sites, 18 to 25 households were randomly selected and 1 eligible male and female were selected randomly within each household using Kish table. In Sonipat district, 3675 households participated in baseline survey (rural: 1881, urban: 1794) with total being 6208 participants (rural: 3104, urban: 3104). In Vizag district, 3589 households (rural: 1817, urban: 1772) participated in the baseline survey with total being 6035 participants (rural: 3069, urban: 2966). Thus, we had 12000 individuals from both urban and rural areas of North and South India.

**Table 3: Manual enumeration of study areas**

| Study site             | Structures | Households | Population ≥30 years | Total population (census 2011) |
|------------------------|------------|------------|----------------------|--------------------------------|
| Sonipat urban sub-site | 24408      | 20406      | 41981                | 102292                         |
| Sonipat rural sub-site | 28813      | 17283      | 40850                | 100935                         |
| Vizag urban sub-site   | 16888      | 39504      | 70735                | 153721                         |
| Vizag rural sub-site   | 33799      | 30817      | 59540                | 121209                         |

**Figure 4: Sample selection for the baseline survey (insert here)**

\*N=total, n=number selected

\*\*CEB=Census Enumeration Block

\*\*\*Cluster = In urban sub-site clusters comprise CEBs, in rural sub-site bigger villages were split into 2 or 3 clusters with sizes of 75-300 households.

### Data collection for the population survey

For the baseline survey, trained health workers visited the selected participants at their homes. Written informed consent was sought and obtained from the selected individuals prior to data collection and a unique identification number was assigned. For each participant, data collection comprised an interviewer administered questionnaire, a brief physical examination (height, weight, waist circumference, hip circumference, blood pressure, body fat percentage), blood and urine collection as detailed below.

Information on demographics, socio-economic characteristics, behavioral risk factors (tobacco use, alcohol use, diet and physical inactivity), family history of various NCDs, female reproductive history, general awareness about diabetes and hypertension, risk factors, prevention, symptoms and diagnosis, complications, treatment and management, medical history of NCDs [diabetes, hypertension, coronary artery disease (CAD), myocardial infarction (MI), stroke, heart failure, chronic kidney disease (CKD), peripheral vascular disease (PVD), chronic obstructive pulmonary disease (COPD), asthma], quality of life, mental health, social support, cost of healthcare and healthcare utilization was collected using a tablet based application (Table 4).

Body measurements such as height, weight, waist and hip circumferences, blood pressure and body fat measurement by bio impedance using TANITA were also obtained using standardized equipment.

Bio-samples (fasting blood and morning urine) were collected for the laboratory estimation of fasting plasma glucose, glycated hemoglobin (HbA1c), lipids, serum creatinine, urea, urine microalbumin and urine creatinine. We have also stored the bio samples for future analysis of emerging biomarkers and genetics.

**Table 4: Summary of indicators, measures, methods and instruments for baseline survey**

| Indicators                                      | Measures                                                                                                 | Methods                                                 | Instruments                                                                                                                                                                                                                                                      |
|-------------------------------------------------|----------------------------------------------------------------------------------------------------------|---------------------------------------------------------|------------------------------------------------------------------------------------------------------------------------------------------------------------------------------------------------------------------------------------------------------------------|
| Demographics and socio-economic characteristics | Age, sex, marital status, religion, education, income, occupation, contact details, and household assets | Questionnaires                                          | Centre for cArdio-metabolic Risk Reduction in South Asia(CARRS) Surveillance Study [5]<br>Establishment of Sentinel Surveillance System for CVD in Indian Industrial Populations (Sentinel Surveillance Study) [6]<br>National Family Health Survey, 2005-06 [7] |
| Behavioral risk factors                         | Tobacco use<br>Alcohol use<br><br>Physical activity<br><br>Dietary habits                                | Questionnaire<br><br>Questionnaire<br><br>Questionnaire | CARRS, Sentinel Surveillance Study<br><br>Global Physical Activity Questionnaire (GPAQ-2) [8]<br><br>CARRS,INTERHEART Study[9]                                                                                                                                   |
| Family history                                  | Prevalence of cardiometabolic diseases (CMDs) among family members related to participants, mortality    | Questionnaire                                           | CARRS                                                                                                                                                                                                                                                            |
| Female                                          | Menarche/                                                                                                | Questionnaire                                           | CARRS                                                                                                                                                                                                                                                            |

|                                            |                                                                                                                                              |                                                                                                                                                                              |                                                                                                                                                                                                                                                                                                                |
|--------------------------------------------|----------------------------------------------------------------------------------------------------------------------------------------------|------------------------------------------------------------------------------------------------------------------------------------------------------------------------------|----------------------------------------------------------------------------------------------------------------------------------------------------------------------------------------------------------------------------------------------------------------------------------------------------------------|
| reproductive history                       | gestational history, menopause (surgical / physiological / whether on hormone replacement therapy) / contraception                           |                                                                                                                                                                              |                                                                                                                                                                                                                                                                                                                |
| Awareness and knowledge                    | General awareness about diabetes and hypertension, risk factors, prevention, symptoms and diagnosis, complications, treatment and management | Questionnaire                                                                                                                                                                | CARRS                                                                                                                                                                                                                                                                                                          |
| Physiological and biochemical risk factors | Hypertension<br><br>Diabetes<br><br>Dyslipidemia                                                                                             | Blood pressure measurements<br><br>Laboratory estimation of fasting plasma glucose, glycated hemoglobin (HbA1c)<br><br>Laboratory estimation of serum total cholesterol, low | Standardized method (American Heart Association) and validated instrument (certified by British Hypertensive Society and Association for the Advancement of Medical Instrumentation)<br>Standardized across both the sites<br><br>Standardized across both the sites<br><br>Standardized across both the sites |

|                                                                           |                                                                                                                           |                                                                                                                                                                                                                     |                                                                                                                                                                                  |
|---------------------------------------------------------------------------|---------------------------------------------------------------------------------------------------------------------------|---------------------------------------------------------------------------------------------------------------------------------------------------------------------------------------------------------------------|----------------------------------------------------------------------------------------------------------------------------------------------------------------------------------|
|                                                                           | Obesity                                                                                                                   | <p>density lipoprotein cholesterol, very low density lipoprotein cholesterol, high density lipoprotein cholesterol, triglycerides</p> <p>Anthropometry (height, weight, waist and hip circumferences, body fat)</p> | <p>sites</p> <p>Standard procedures based on National Health And Nutrition Examination Survey-III with instruments used in epidemiological studies on South Asian population</p> |
| Medical history                                                           | <p>Chronic kidney disease</p> <p>Stroke, myocardial infraction, Congestive heart failure, Chronic stable angina</p>       | <p>Serum creatinine, urea, urine microalbumin and urine creatinine</p> <p>Questionnaires including medical history</p>                                                                                              | <p>Standardized across both the sites</p> <p>Rose Angina, CARRS</p>                                                                                                              |
| Treatment history, health services, quality of care and health care costs | <p>Awareness and risk factor control</p> <p>Access to health care services, utilization of services, health insurance</p> | Questionnaire                                                                                                                                                                                                       | CARRS                                                                                                                                                                            |

|                                |                                                                                                               |               |                                                                         |
|--------------------------------|---------------------------------------------------------------------------------------------------------------|---------------|-------------------------------------------------------------------------|
|                                | coverage, costs of treating CMDs and their risk factors                                                       |               |                                                                         |
| Prevalence                     | COPD and asthma                                                                                               | Questionnaire | NHANES III and present standards of the American Thoracic Society (ATS) |
| Health related Quality of Life | Mobility, self-care, usual activities, pain/discomfort, anxiety/depression (related to CMDs and risk factors) | Questionnaire | European Quality of Life 5 Dimensions questionnaire (EQ-5D-3L) [10]     |
| Mental health                  | Depression                                                                                                    | Questionnaire | Modified from Patient Health Questionnaire 9 (PHQ-12) [11]              |
| Social well-being              | Social support                                                                                                | Questionnaire | Developed for UDAY                                                      |

### Data collection for the patient survey

Trained research staff visited health facilities located in the aforementioned selected study areas and approached patients attending outpatient section of the health facilities and identified those with the diagnosis of diabetes and/or hypertension based on their prescription note for participating in the study. Written informed consent was sought and obtained from the individuals prior to data collection and data collection comprised an interviewer administered questionnaire (Table 5).

The patient survey was done among a convenience sample of 400 patients having diabetes and/or hypertension attending health facilities and residing in the selected study areas of Sonipat and Vizag.

Inclusion criteria: We included patients with diabetes and or hypertension residing/attending health facilities in the sampled urban and rural areas of Sonipat and Vizag respectively and were willing to participate and provide informed consent.

Exclusion criteria: We excluded those unwilling to provide informed consent.

**Table 5: Summary of indicators, measures, methods and instruments for the patient survey**

| Indicators                                           | Measures                                                                                                                      | Methods        | Instruments                           |
|------------------------------------------------------|-------------------------------------------------------------------------------------------------------------------------------|----------------|---------------------------------------|
| Demographics and socio-economic characteristics      | Age, sex, education, income, occupation, contact details                                                                      | Questionnaires | CARRS<br>Sentinel Surveillance Study  |
| Behavioral risk factors                              | Tobacco use<br>Alcohol use                                                                                                    | Questionnaire  | CARRS, Sentinel Surveillance Study    |
| Awareness and knowledge of diabetes and hypertension | Awareness of risk factors, symptoms and diagnosis, cut-off levels for diagnosis, complications, treatment and management      | Questionnaire  | Developed for UDAY                    |
| Diabetes and hypertension related medical history    | Diagnosis, health care utilization, control, self-management practices, complications, comorbidities, and treatment adherence | Questionnaire  | Developed for UDAY                    |
| Health related Quality of Life                       | Mobility, self-care, usual activities,                                                                                        | Questionnaire  | European Quality of Life 5 Dimensions |



|                        |                                                                        |               |                                                       |
|------------------------|------------------------------------------------------------------------|---------------|-------------------------------------------------------|
|                        | pain/discomfort, anxiety/depression (related to CMDs and risk factors) |               | questionnaire (EQ-5D-3L)                              |
| Mental health          | Depression                                                             | Questionnaire | Modified from Patient Health Questionnaire 9 (PHQ-12) |
| Social well-being      | Social support                                                         | Questionnaire | Developed for UDAY                                    |
| Healthcare utilization | Hospital visits in the past 12 months and health care expenditure      | Questionnaire | CARRS                                                 |

#### Data collection for the provider surveys

Trained research staff visited health facilities located in the aforementioned selected study areas and approached healthcare providers (physicians and pharmacists). Written informed consent was sought and obtained from the individuals prior to data collection and data collection comprised an interviewer administered questionnaire (Table 6).

The physician survey was done among a convenience sample of 50 physicians working in the health facilities located in the selected study areas of Sonipat and Vizag.

Inclusion criteria: We included physicians working in health facilities located in the sampled urban and rural areas of Sonipat and Vizag respectively and were willing to participate and provide informed consent.

Exclusion criteria: Those unwilling to provide informed consent were excluded.

The pharmacist survey was conducted among 350 pharmacists by trained research staff in the aforementioned selected study areas. Written informed consent was sought

and obtained from the individuals prior to data collection and data collection comprised an interviewer administered questionnaire.

Inclusion criteria: We included pharmacists who were located in the sampled urban and rural areas of Sonipat and Vizag respectively, dispensing medicines for diabetes and hypertension, were willing to participate and provide informed consent.

Exclusion criteria: Those not dispensing medicines for diabetes and hypertension and unwilling to provide informed consent were excluded.

**Table 6: Summary of indicators, measures, methods and instruments for the provider survey (physicians)**

| Indicators                                                                                               | Measures                                                                                                      | Methods       | Instruments        |
|----------------------------------------------------------------------------------------------------------|---------------------------------------------------------------------------------------------------------------|---------------|--------------------|
| Socio-demographic details                                                                                | Age, gender, qualification, years of practice, patient load, training in diabetes and hypertension management | Questionnaire | Developed for UDAY |
| Knowledge and practice pertaining to diabetes and hypertension diagnosis and evaluation of complications | Signs and symptoms, diagnosis and cut-off levels for diagnosis, evaluation for complications                  | Questionnaire | Developed for UDAY |
| Treatment practices for diabetes and hypertension                                                        | Lifestyle modifications, prevention and management of                                                         | Questionnaire | Developed for UDAY |

|  |                                                                   |  |  |
|--|-------------------------------------------------------------------|--|--|
|  | complications,<br>names of<br>medicines<br>prescribed<br>commonly |  |  |
|--|-------------------------------------------------------------------|--|--|

### Data collection for the health facility survey

Permission was sought and obtained from respective district medical/health officers prior to data collection and data collection comprised an interviewer administered questionnaire (Table 7). Trained research staff visited public healthcare facilities located in the aforementioned selected study areas and approached the person/ medical officer in charge.

The facility survey was done in 50 public healthcare facilities (sub-centres, primary and community health centres, taluk/district/tertiary hospitals) situated in the selected study areas of Sonipat and Vizag.

**Table 7: Summary of indicators, measures, methods and instruments for the health facility survey**

| Indicators          | Measures                                                                                                                                                                                                       | Methods       | Instruments                                                                                             |
|---------------------|----------------------------------------------------------------------------------------------------------------------------------------------------------------------------------------------------------------|---------------|---------------------------------------------------------------------------------------------------------|
| Coverage statistics | Types of services offered, number of hours and days services provided per week, population covered, average daily outpatient department (OPD) attendance, number of beds available, status of National program | Questionnaire | Adapted from Service Availability and Readiness Assessment tool (SARA) of the World Health Organization |

|                             |                                                                                                                                                                                                                                        |                          |                                                              |
|-----------------------------|----------------------------------------------------------------------------------------------------------------------------------------------------------------------------------------------------------------------------------------|--------------------------|--------------------------------------------------------------|
|                             | for control and prevention of diabetes, cardiovascular disease and stroke (NPCDCS) implementation                                                                                                                                      |                          |                                                              |
| Recommended manpower list   | Numbers working at District Hospitals, Community Health Centres, Primary Health Centres and Sub-centres against recommended numbers and reasons for lack of recommended personal. Additional manpower required for NCDs                | Checklist, questionnaire | Adapted from Indian Public Health Standards, (IPHS) and SARA |
| Recommended medication list | Availability of medicines at District Hospitals, Community Health Centres, Primary Health Centres and Sub-centres against recommended medicines and reasons for lack for recommended medicines. Additional medicines required for NCDs | Checklist, questionnaire | Adapted from IPHS and SARA                                   |
| Recommended equipment list  | Numbers of equipment available at District Hospitals, Community Health Centres, Primary Health Centres and Sub-centres against recommended                                                                                             | Checklist, questionnaire | Adapted from IPHS and SARA                                   |

|                                                                          |                                                                                                                                                                                                                                                                     |                          |                            |
|--------------------------------------------------------------------------|---------------------------------------------------------------------------------------------------------------------------------------------------------------------------------------------------------------------------------------------------------------------|--------------------------|----------------------------|
|                                                                          | equipment and their functional status.<br>Additional equipment required for NCDs                                                                                                                                                                                    |                          |                            |
| Recommended investigative services list                                  | Investigative services available at District Hospitals, Community Health Centres, Primary Health Centres and Sub-centres against recommended services and reasons for their unavailability.<br>Additional investigative services required for NCDs                  | Checklist, questionnaire | Adapted from IPHS and SARA |
| Recommended activities list                                              | Frequency of recommended activities conducted and methods of conducting at District Hospitals, Community Health Centres, Primary Health Centres and Sub-centres for current diagnosis, treatment and health promotion.<br>Reasons for not conducting the activities | Checklist, questionnaire | Adapted from IPHS and SARA |
| Availability of national guidelines and training of healthcare providers | Availability of national guidelines for diagnosis and management of diabetes, hypertension and CVD and training of healthcare providers in the                                                                                                                      | Questionnaire            | Adapted from IPHS and SARA |

|  |                                                                |  |  |
|--|----------------------------------------------------------------|--|--|
|  | facility to diagnose and manage diabetes, hypertension and CVD |  |  |
|--|----------------------------------------------------------------|--|--|

### Bio-sample collection and storage

Blood samples (in fasting state) were collected in plain, fluoride and EDTA vacutainers (Becton & Dickinson, USA) by trained phlebotomists in households or in camps arranged close to the households. Samples for estimation for blood glucose were kept in ice and transferred to laboratories within 2 hours of sample collection and immediately centrifuged. Samples were centrifuged at 2500 rpm for 15 minutes and serum / plasma were transferred into the cryo-vials which were stored in 20°C immediately. Buffy coat from EDTA vacutainers were separated and stored into cryo-vials for DNA extraction. Red blood cells were washed thrice with normal saline and were stored for analysis of fatty acids in future. First early morning voided urine was collected from the participants and has been stored in deep freezer for future analysis of metabolites. All these samples were transported to the biochemistry laboratory at the Public Health Foundation of India (PHFI) in dry-ice on the day of collection from Sonipat and Vizag, where they were stored at -80°C.

All clinical chemistry parameters were analyzed on autoanalyzer Cobas 311 using reagents from Roche Diagnostics, Switzerland. Glucose was estimated using Hexokinase method, cholesterol by enzymatic cholesterol oxidase method, triglycerides by GPO-PAP method & HDL and LDL by direct method, AST & ALT was estimated according to IFCC without pyridoxal phosphate, bilirubin total by Diazonium ion method,

1  
2  
3 bilirubin direct by Diazo with sulphanic acid method, urea by kinetic method, creatinine  
4  
5 by Jaffe's method, and urinary microalbumin using immuno turbidimetric method.  
6  
7 HbA1c was assayed by hplc method using reagents from Bio-Rad Laboratories,  
8  
9 Hercules, CA.  
10

11  
12 Two levels of internal controls were run with every batch of samples. The intra assay  
13  
14 and inter assay coefficient of variation for all the parameters were <3% and <5 %  
15  
16 respectively.  
17

18  
19 The biochemistry laboratory is part of External Quality Assurance program from RIQAS  
20  
21 for clinical chemistry parameters and HbA1c assay.  
22  
23  
24  
25

### 26 **Evaluation of cost-effectiveness**

27  
28 This will be evaluated by assessing the costs and benefits of the multi-component,  
29  
30 multi-level comprehensive interventions in improving diabetes related health outcomes.  
31  
32 Data on healthcare utilization and costs, as well as that of out of pocket expenditure will  
33  
34 be collected in the baseline and end line surveys. In addition, data on direct costs  
35  
36 including the cost of personnel, provider training, medications, lab tests and supplies,  
37  
38 screening, outpatient visits, and costs related to the social marketing campaign will be  
39  
40 obtained during the implementation process. The total costs entailed to identify a person  
41  
42 with diabetes as well as to appropriately treat that person to recommended targets  
43  
44 based on guidelines will be measured. In addition, we will model the costs accrued from  
45  
46 the use of drugs and other related interventions, based on results of other such  
47  
48 comprehensive programs and do a comparison to assess effectiveness. Based on the  
49  
50 aforesaid indicators, we will develop a comprehensive cost-effectiveness model to  
51  
52 assess the overall program effectiveness.  
53  
54  
55  
56  
57  
58  
59  
60

Geographical Information System (GIS) based mapping of study households and neighborhood built environment

All households as well as the study areas, including various points of interest as indicated below were geocoded using GIS mapping. This will be used to comprehensively assess the built environment and its impact on diabetes hypertension and risk factors. GIS based techniques will be employed to study the association between built environment (BE) features and diabetes, hypertension and related risk factors.

Specially trained field staff visited all participant households and used handheld Garmin™ GPS receivers to capture GPS locations of the households. The captured GPS coordinates were verified using Google Earth to see if the locations matched the actual locations.

Table 8 below shows the built environment features from the study areas that were located and mapped.

**Table 8: Characteristics of the built environment in study sites**

| Environment features  | Points of interest                                             | N   | Sonipat | Vizag |
|-----------------------|----------------------------------------------------------------|-----|---------|-------|
| Healthcare facilities | Government hospitals                                           | 64  | 36      | 28    |
|                       | Private hospitals & clinics                                    | 228 | 147     | 81    |
|                       | Registered medical practitioners and unqualified practitioners | 220 | 195     | 25    |
|                       | Other health professionals                                     | 120 | 115     | 3     |
|                       | Pharmacies                                                     | 337 | 224     | 113   |



|                         |                                             |          |     |     |
|-------------------------|---------------------------------------------|----------|-----|-----|
|                         | Medical laboratories                        | 46       | 30  | 16  |
| Food outlets            | Hotels                                      | 162      | 4   | 161 |
|                         | Restaurants                                 | 33       | 10  | 23  |
|                         | Small eateries                              | 97       | 40  | 57  |
|                         | Provision / department stores               | 313      | 196 | 117 |
|                         | Fruit / vegetable / juice outlets           | 254      | 36  | 218 |
|                         | Meat / fish shops                           | 128      | 24  | 104 |
|                         | Public distribution system<br>(ration)shops | 52       |     | 52  |
|                         | Milk outlets                                | 126      | 344 | 122 |
|                         | Bakeries/ sweet shops                       | 106      | 56  | 50  |
|                         | Tobacco outlets                             | Pan shop | 713 | 17  |
| Alcohol outlets         | Authorized government outlets               | 45       | 31  | 14  |
|                         | Unauthorized alcohol outlets                | 100      |     | 100 |
| Recreational facilities | Parks                                       | 91       | 62  | 29  |
|                         | Walking tracks                              | 6        |     | 6   |
|                         | Play grounds                                | 50       | 43  | 7   |
|                         | Fitness / yoga centers                      | 10       | 6   | 4   |
| Other                   | Anganwadis, schools, temples                | 633      | 124 | 509 |
|                         | etc.                                        |          |     |     |

Household GPS locations and neighborhood BE features were integrated with participant data collected as part of the baseline data collection. An overview of the GIS mapping is provided in Figure 5. Area boundaries were obtained from government

1  
2  
3 records and digitized. All spatial data was integrated into a spatial database and  
4  
5 ArcGIS™ software will be used to carry out following spatial analysis methods.  
6  
7

- 8 • Distance calculations: distance between participant households and features of  
9 interest such as health care facilities, food and alcohol outlets, parks etc. and  
10 their association between CMD and risk factors.  
11  
12
- 13 • Spatial aggregation: Aggregation of features such as number of food outlets,  
14 parks etc. in the neighbourhood and relationship with CMD and risk factors.  
15  
16
- 17 • Clustering: Identify clustering of CMD and risk factors (hotspots) and determine if  
18 disease clusters are of sufficient geographic size and concentration to have not  
19 occurred by chance.  
20  
21
- 22 • Spatial smoothing and interpolation: Used to derive a spatial surface from  
23 sampled data points (filling in where data are unobserved) or to smooth across  
24 polygons (aggregate data) to create more robust estimates.  
25  
26
- 27 • Spatial regression: Use of Spatial regression methods such as Geographically  
28 weighted regression ( GWR) to further understand the relationship between built  
29 environment and CMD risk factors as standard statistical regression models,  
30 which assume independence of the observations, are not appropriate for  
31 analysing spatially dependent data.  
32  
33  
34  
35  
36  
37  
38  
39  
40  
41  
42  
43  
44

45 **Figure 5: GIS mapping overview (insert here)**  
46  
47  
48

49 Data management  
50

51 Data were collected in electronic format using customized android based software on a tablet  
52 platform and uploaded to server on a real time basis (Figure 6). For ensuring quality control, all  
53 validation, range and logical checks were in-built in the software. Error reports were generated  
54 bi-weekly and sent to the study sites for rectification. Errors were checked against completion of  
55  
56  
57  
58  
59  
60

1  
2  
3 the questionnaire, identifiers and adherence to the sampling strategy of interviews (only one  
4 man and one woman from single household).  
5

6  
7 Further, site research teams identified any other issues and reported to centralized team for the  
8 corrections. Data correction took place concomitantly with the conduct of the baseline survey.  
9  
10 Similarly, bio-sample reports were matched with participant questionnaires and the final data  
11 was locked after all matching, and rectification of errors.  
12  
13  
14  
15

### 16 **Figure 6: Data collection and management pathway (insert here)**

17

#### 18 Analysis plan

19

20  
21 Data were entered into a database designed specifically for the project, housed at PHFI  
22 and accessible only to investigators and designated study staff. Data will be analysed  
23  
24 using Stata/SE version 10.1 for windows software. Descriptive statistics will be done  
25  
26 and the data expressed as frequencies and percentages for categorical variables and  
27  
28 means and standard deviations for normally distributed continuous variables or inter-  
29  
30 quartile ranges otherwise. Differences between gender groups, age groups, socio-  
31  
32 economic groups, study sites, time periods and individual hypotheses will be tested  
33  
34 using appropriate analytical statistical tests (Chi-square tests for categorical variables, t-  
35  
36 tests continuous variables, multiple linear regression for continuous variables, and  
37  
38 multiple logistic regression for categorical variables). Stratified analysis will be done to  
39  
40 assess for potential confounding and effect modification by other variables. A p-value of  
41  
42 < 0.05 will be considered to indicate statistical significance. Multi-level modelling will be  
43  
44 undertaken by clusters and households as potential levels.  
45  
46  
47  
48  
49  
50  
51  
52  
53

#### 54 **Discussion**

55  
56  
57  
58  
59  
60

1  
2  
3 UDAY is one of the largest community based intervention studies established in India to  
4  
5 implement and evaluate a multi-component, multi-level, cost-effective, comprehensive  
6  
7 intervention program to concomitantly improve the prevention, detection and optimal  
8  
9 management of diabetes and hypertension, which together constitute the leading NCDs  
10  
11 in India. Their high and rising burden coupled with huge healthcare costs underlines the  
12  
13 need for cost-effective community based approaches supplemented by measures to  
14  
15 strengthen the health system to address both these NCDs effectively as envisaged in  
16  
17 UDAY.  
18  
19

20  
21 Most of the evidence on community interventions for chronic NCDs are from developed  
22  
23 countries [12-13]. In the last two decades some evidence has emerged from developing  
24  
25 countries as well but not quite commensurate to the disproportionate burden borne by  
26  
27 them (80% NCD mortality) [14-15]. This is due to several reasons including resources to  
28  
29 conduct such large projects as well as the technical capacity [14,15]. However,  
30  
31 available information indicates that results are likely better in developing countries (e.g.  
32  
33 Isfahan Healthy Heart Program in Iran, diabetes prevention programs in China and  
34  
35 India) [14-16]. We have taken into account findings of such prior research and  
36  
37 attempted to address the reported gaps by adding relevant elements to the design of  
38  
39 our study. For instance, most such intervention programs have entailed community  
40  
41 based interventions (largely targeting lifestyle modification) but have not had active  
42  
43 healthcare system and advocacy interventions as proposed in our study. In addition,  
44  
45 many of the diabetes prevention programs have targeted high risk groups and not the  
46  
47 general free living population as envisaged in this program. Further, we have used  
48  
49 several innovations (see table 1) including task shifting/sharing of care to non-physician  
50  
51 health workers by the extensively leveraging low-cost m-health technology to enable  
52  
53  
54  
55  
56  
57  
58  
59  
60

1  
2  
3 and empower them to screen and deliver interventions as well as physicians to treat  
4 patients as per evidence based algorithms. We have also used GIS mapping to  
5  
6 characterize the sites, built environment, healthcare facilities and providers to examine  
7  
8 the influence of built environment on diabetes/hypertension and their risks factors as  
9  
10 well as care pathways that patients undertake, in order to deliver interventions in a more  
11  
12 focused way. In addition, we have built in extensive stakeholder and community  
13  
14 engagement in the study implementation which should aid in improving acceptability  
15  
16 and buy in for the intervention program.  
17  
18  
19

20  
21 Further, the community based cohorts established will not only facilitate tracking of the  
22  
23 trends in risk factors and diseases in rapidly transitioning populations in India, but also  
24  
25 serve as well characterized population platforms for embedding and evaluating new  
26  
27 research questions of public health relevance in combating the rise of NCDs.  
28  
29

30  
31 Notably, a unique strength of UDAY besides occurring in a developing country setting  
32  
33 where there are limited community based projects, in comparison to various other  
34  
35 community based projects conducted in both developed and developing countries,  
36  
37 which have either addressed prevention or management of select chronic conditions, is  
38  
39 that UDAY aims to address both prevention and management of concurrently and  
40  
41 comprehensively.  
42  
43

44  
45 However, the study has some limitations. Firstly, we used a pre-post study design for  
46  
47 evaluating the effect of our interventions. Though, a randomized controlled trial is a  
48  
49 better design to evaluate the effectiveness of interventions, providing a higher level of  
50  
51 evidence than a pre-post design, to study the effect of multi-component interventions  
52  
53 delivered at multiple levels in a comprehensive manner in a large population over a vast  
54  
55 geographic area, we considered the pre-post design as more appropriate for our study.  
56  
57  
58

1  
2  
3 Further, we also wanted to understand and examine the operational part of the program  
4 implementation to gain insights into underpinning factors behind success or failure that  
5  
6 can inform possible replication and scale up in the future.  
7  
8

9  
10 Secondly, our study does not include controls for the comparison. Given the size of the  
11 population covered by the interventions, we would have had to recruit control  
12  
13 communities of similar size and numbers, which wasn't feasible from an implementation  
14 and resources availability point of view. However, our baseline and end line surveys that  
15 evaluate the impact are done on independent random samples of the population, which  
16 should provide robust data regarding potential changes over baseline in the levels of:  
17  
18 public awareness and knowledge about diabetes and hypertension; those aware,  
19 diagnosed, treated and controlled to recommended targets; the use of guideline based  
20 management by providers leading to improved health outcomes and access to  
21  
22 healthcare for people living with diabetes and hypertension in India. In addition, we will  
23 be comparing our results with ongoing national survey data on NCDs and their risk  
24 factors (National Family Health Survey, Annual Health Survey, District Level Household  
25 Survey) as well as a New National NCD survey which is being implemented currently.  
26  
27 This will help assess secular trends and evaluate our findings in conjunction with such  
28 trends if any. Also we did not account for the regression to the mean as there would be  
29 at least some people both in the end line and baseline. We will do sensitivity analysis to  
30 explore this bias.  
31  
32

33  
34  
35 Thirdly, one of the major interventions of our program is to implement a community  
36 based screening, follow-up and educational program through health workers. We  
37 specifically hired and trained health workers to implement this interventional component,  
38 which might add to the cost of implementing a community based diabetes and  
39  
40  
41  
42  
43  
44  
45  
46  
47  
48  
49  
50  
51  
52  
53  
54  
55  
56  
57  
58  
59  
60

1  
2  
3 hypertension prevention and management program. However, the additional cost of is  
4 likely to be minimal as indicated by previous modelling estimates of training and using  
5 health workers.  
6  
7  
8

9  
10 Fourthly, we are using multi-component interventions at multiple levels (health  
11 promotion campaigns, health workers led home based screening, follow-up and  
12 education, training of healthcare providers, registry for facility based improvement in  
13 quality of care, patient networks and advocacy to strengthen the health system) which  
14 makes it difficult to evaluate the individual contribution of each intervention. However,  
15 the purpose is to deliver it in a comprehensive manner to improve outcomes, which to  
16 our knowledge has hitherto not been implemented in similar settings, and not to tease  
17 out impact of individual interventions in a milieu where many individuals have elevations  
18 of multiple NCD risk factors and suffer often from co-morbid conditions that require to be  
19 addressed comprehensively.  
20  
21  
22  
23  
24  
25  
26  
27  
28  
29  
30  
31

32  
33 It is anticipated that the results obtained from the study will inform policy makers on the  
34 most appropriate community and health system based approaches that are effective in  
35 stemming the rising burden of diabetes and hypertension in India and countries with  
36 similar challenges.  
37  
38  
39  
40  
41  
42  
43  
44  
45  
46  
47  
48  
49  
50  
51  
52  
53  
54  
55

## 56 **Data sharing and Contributorship statement**

57  
58  
59  
60

1  
2  
3 Data will be available to the study investigators only. De-identified data can be shared  
4  
5 with other researchers based on specific request to the publication sub-committee of the  
6  
7 project with potential research questions to be examined.  
8  
9

10  
11  
12 Sailesh Mohan, K. Srinath Reddy, Dorairaj Prabhakaran and Nikhil Tandon conceived  
13  
14 the study. Sailesh Mohan wrote the first draft of the manuscript. Prashant Jarhyan,  
15  
16 Shreeparna Ghosh, Nikhil Srinivasapura Venkateshmurthy, Ritu Rana, Cheena  
17  
18 Malhotra, Ruby Gupta, Bhaskara Rao and Sanjay Kalra wrote specific sections of the  
19  
20 manuscript as well as contributed to the design and implementation of the study.  
21  
22  
23 Bhaskara Rao and Sanjay Kalra also coordinate the activities in the study sites and  
24  
25 provide technical support. Sailesh Mohan, Shreeparna Ghosh, Prashant Jarhyan, and  
26  
27 Nikhil Srinivasapura Venkateshmurthy contributed to the collection and assembly of  
28  
29 data. All authors provided input into the study design, as well as provided critical  
30  
31 intellectual input for revision of the manuscript and approved the final version of the  
32  
33 manuscript.  
34  
35  
36  
37  
38  
39

### 40 **Acknowledgements**

41  
42 The UDAY project is led by the Public Health Foundation of India, Gurgaon, India in  
43  
44 collaboration with Population Services International, India and Project HOPE. We  
45  
46 acknowledge the contributions of the field and research staff of the project. The funder  
47  
48 has no role in the design, implementation, and evaluation of the project as well as in the  
49  
50 writing of this paper. All contents of this paper are solely the responsibility of the  
51  
52 authors.  
53  
54

### 55 **Funding source**



1  
2  
3 It is supported by an unrestricted educational grant from Eli Lilly and Company under  
4 the Lilly NCD Partnership Program.  
5  
6

### 7 **Disclaimer**

8  
9  
10 The funding agency had no role in the design, conduct or analysis of the study, and no  
11 role in the decision to submit the protocol for publication.  
12  
13

### 14 **Conflicts of interest**

15  
16  
17 None declared  
18

### 19 **Ethics and dissemination**

20  
21 Ethical clearance for conduct of the study was obtained from the Institutional Ethics  
22 Committee (IEC) of the Public Health Foundation of India. The findings will be targeted  
23 primarily at public health policymakers and advocates, but will be disseminated widely  
24 through other mechanisms including conference presentations and peer-reviewed  
25 publications, as well as to the participating communities.  
26  
27  
28  
29  
30  
31  
32  
33  
34  
35  
36  
37  
38  
39  
40  
41  
42  
43  
44  
45  
46  
47  
48  
49  
50  
51  
52  
53  
54  
55  
56  
57  
58  
59  
60

## References

1. National Multisectoral Action Plan for Prevention and Control of NCDs in India. World Health Organization (WHO) Country Office for India, New Delhi, 2013.
2. International Diabetes Federation. IDF Diabetes Atlas, 7th edition. 7th ed. Brussels, Belgium: International Diabetes Federation, 2015.
3. Reddy KS, Shah B, Varghese C, et al. Responding to the threat of chronic diseases in India. *Lancet* 2005; 366:1744-49.
4. Mohan S, Koller T. Hypertension and related comorbidities in India: Implications for the health system. World Health Organization (WHO) Country Office for India, New Delhi, 2013.
5. Nair M, Ali MK, Ajay VS, et al. CARRS Surveillance study: design and methods to assess burdens from multiple perspectives. *BMC Public Health* 2012;12:701.
6. Reddy KS, Prabhakaran D, Chaturvedi V, et al. Methods for establishing a surveillance system for cardiovascular diseases in Indian industrial populations. *Bull World Health Organ* 2006; 84:461-69.
7. International Institute for Population Sciences (IIPS) and Macro International. 2007. National Family Health Survey (NFHS-3), 2005–06: India: Volume II. Mumbai: IIPS.
8. World Health Organization. Global Physical Activity Questionnaire (GPAQ) Analysis Guide: World Health Organization. Available at: [http://www.who.int/chp/steps/resources/GPAQ\\_Analysis\\_Guide.pdf](http://www.who.int/chp/steps/resources/GPAQ_Analysis_Guide.pdf) (Assessed 15 December 2015)
9. Yusuf S, Hawken S, Ounpuu S, et al. Effect of potentially modifiable risk factors associated with myocardial infarction in 52 countries (the INTERHEART study): case-control study. *Lancet* 2004; 364:937-52.
10. EuroQol Group. EuroQol--a new facility for the measurement of health-related quality of life. *Health Policy* 1990; 16:199–208.
11. Poongothai S, Pradeepa R, Ganesan A, et al. Reliability and validity of a modified PHQ9 item inventory (PHQ12) as a screening instrument for assessing depression in Asian Indians (CURES—65). *J Assoc Physicians India* 2009; 57: 147–52.
12. Berra K, Franklin B, Jennings C. Community-Based Healthy Living Interventions. *Prog Cardiovasc Dis* 2017; 59:430-439.
13. Puska P. Why Did North Karelia-Finland Work? Is it Transferrable? *Glob Heart* 2016; 11:387-391.
14. Sarrafzadegan N1, Kelishadi R, Esmailzadeh A, Mohammadifard N, Rabiei K, Roohafza H, Azadbakht L, Bahonar A, Sadri G, Amani A, Heidari S, Malekafzali H. Do lifestyle interventions work in developing countries? Findings from the Isfahan Healthy Heart Program in the Islamic Republic of Iran. *Bull World Health Organ* 2009;87:39-50.

- 1  
2  
3 15. Harati H, Hadaegh F, Momenan AA, Ghanei L, Bozorgmanesh MR, Ghanbarian A,  
4 Mirmiran P, Azizi F. Reduction in incidence of type 2 diabetes by lifestyle intervention in  
5 a middle eastern community. *Am J Prev Med* 2010; 38:628-636.  
6  
7 16. Rawal LB, Tapp RJ, Williams ED, Chan C, Yasin S, Oldenburg B. Prevention of type  
8 2 diabetes and its complications in developing countries: a review. *Int J Behav Med*.  
9 2012; 19:121-33.  
10  
11  
12  
13  
14  
15  
16  
17  
18  
19  
20  
21  
22  
23  
24  
25  
26  
27  
28  
29  
30  
31  
32  
33  
34  
35  
36  
37  
38  
39  
40  
41  
42  
43  
44  
45  
46  
47  
48  
49  
50  
51  
52  
53  
54  
55  
56  
57  
58  
59  
60

For peer review only

1  
2  
3  
4  
5  
6  
7  
8  
9  
10  
11  
12  
13  
14  
15  
16  
17  
18  
19  
20  
21  
22  
23  
24  
25  
26  
27  
28  
29  
30  
31  
32  
33  
34  
35  
36  
37  
38  
39  
40  
41  
42  
43  
44  
45  
46  
47  
48  
49  
50  
51  
52  
53  
54  
55  
56  
57  
58  
59  
60

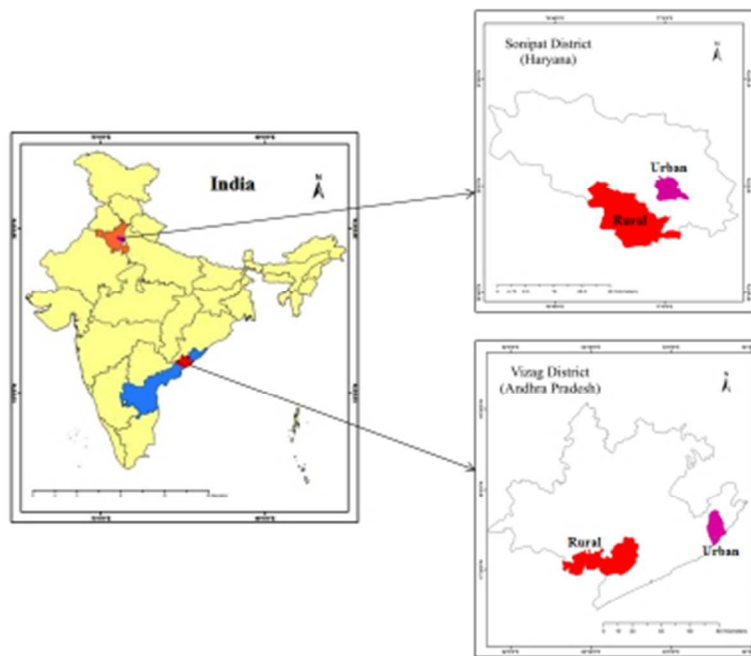

40x30mm (300 x 300 DPI)

ew only

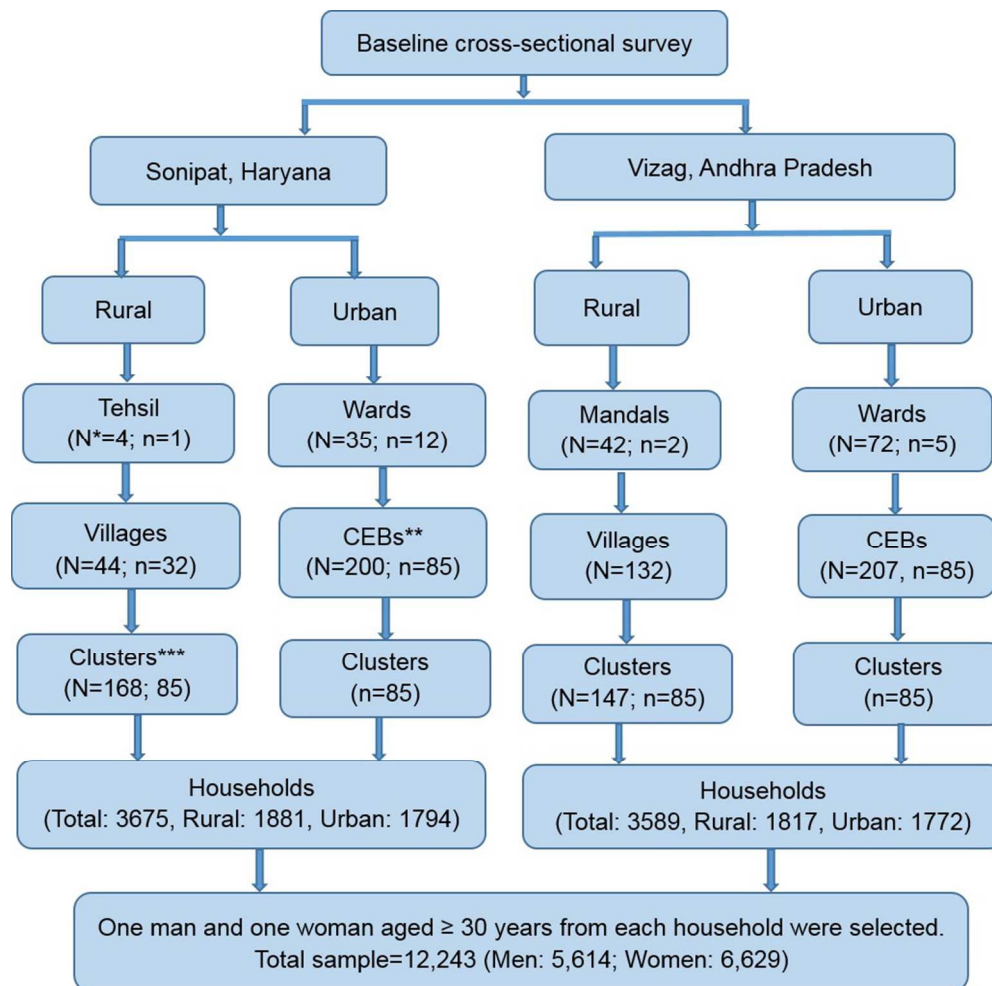

\*N=total, n=number selected

\*\*CEB=Census Enumeration Block

\*\*\*Cluster = In urban sub-site clusters comprise CEBs, in rural sub-site bigger villages were split into 2 or 3 clusters with sizes of 75-300 households.



48x33mm (300 x 300 DPI)

view only

1  
2  
3  
4  
5  
6  
7  
8  
9  
10  
11  
12  
13  
14  
15  
16  
17  
18  
19  
20  
21  
22  
23  
24  
25  
26  
27  
28  
29  
30  
31  
32  
33  
34  
35  
36  
37  
38  
39  
40  
41  
42  
43  
44  
45  
46  
47  
48  
49  
50  
51  
52  
53  
54  
55  
56  
57  
58  
59  
60

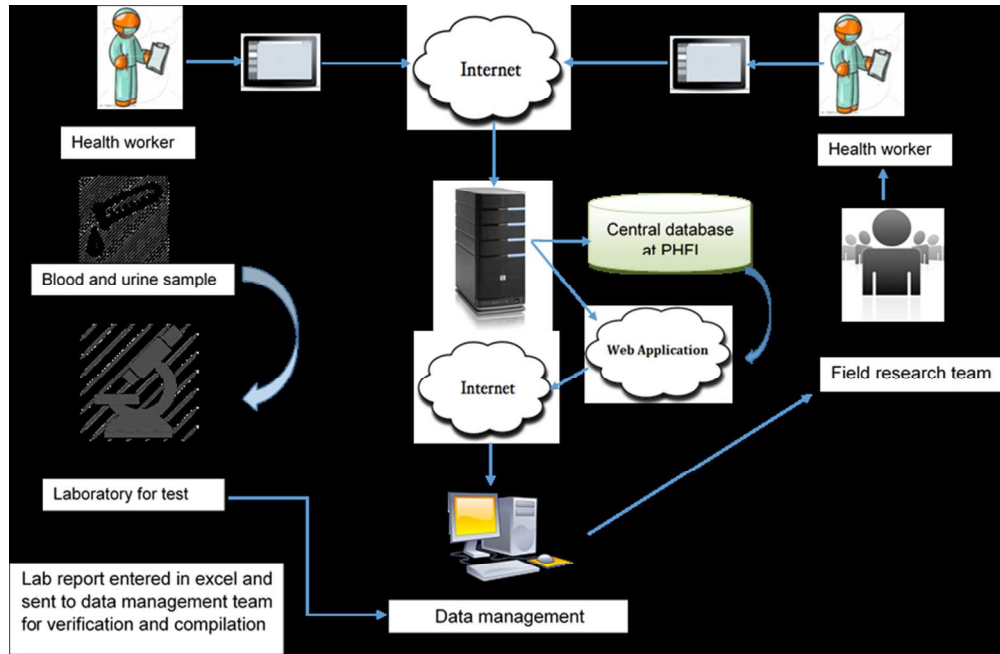

74x48mm (300 x 300 DPI)

view only

1  
2  
3  
4  
5  
6  
7  
8  
9  
10  
11  
12  
13  
14  
15  
16  
17  
18  
19  
20  
21  
22  
23  
24  
25  
26  
27  
28  
29  
30  
31  
32  
33  
34  
35  
36  
37  
38  
39  
40  
41  
42  
43  
44  
45  
46  
47  
48  
49  
50  
51  
52  
53  
54  
55  
56  
57  
58  
59  
60

## UDAY- Priority Ecosystem Interventions



56x58mm (300 x 300 DPI)



1  
2  
3  
4  
5  
6  
7  
8  
9  
10  
11  
12  
13  
14  
15  
16  
17  
18  
19  
20  
21  
22  
23  
24  
25  
26  
27  
28  
29  
30  
31  
32  
33  
34  
35  
36  
37  
38  
39  
40  
41  
42  
43  
44  
45  
46  
47  
48  
49  
50  
51  
52  
53  
54  
55  
56  
57  
58  
59  
60

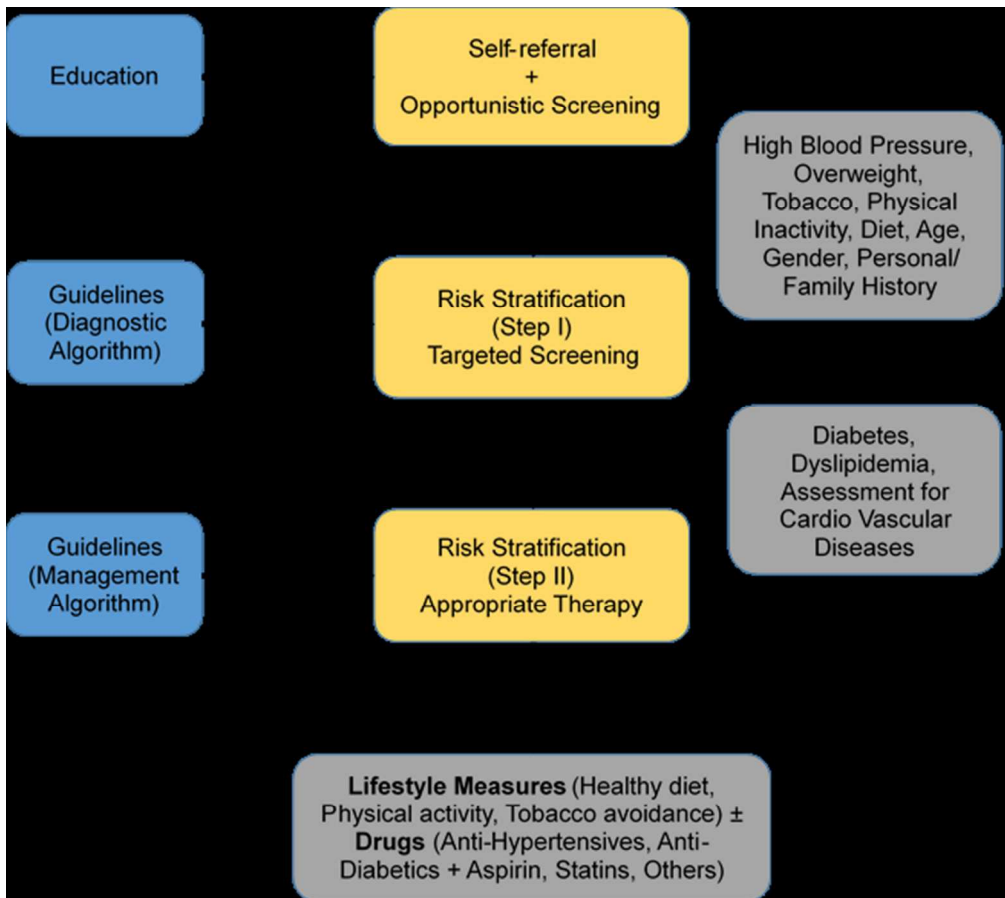

55x49mm (300 x 300 DPI)

only

### Supplementary file

Sonipat district in the state of Haryana, is north of India's capital city Delhi. It covers an area of 2,122 sq. km and has a population of 1,450,001 (Census 2011). The district has 4 tehsils (sub-districts), namely Gohana, Ganaur, Sonipat and Kharkhoda. Among these, we selected Sonipat tehsil as the urban sub-site and Kharkhoda as the rural sub-site.

Vizag district is one of the north eastern coastal district in the state of Andhra Pradesh and lies in proximity to the Bay of Bengal. It covers an area of 11,161 sq. km and has a population of 4,290,589 (Census 2011). Vizag district has 43 mandals (sub-districts) comprising 4 urban mandals and 39 rural mandals. Among these, we selected Vizag as the urban sub-site and Makavarapalem and Nathavaram as the rural sub-site.
