# Supplementary material for: UDAY: A comprehensive diabetes and hypertension prevention and management program in India
Source: PubMed Central journal article supplement — BMJ Open. 2018 Jul 10;8(6):e015919. doi: 10.1136/bmjopen-2017-015919 (PMC6082491; doi:10.1136/bmjopen-2017-015919), 2018-07-10
Supplement: bmjopen-2017-015919supp001.pdf [file bmjopen-2017-015919supp001.pdf]

## **Supplementary file**

Sonipat district in the state of Haryana, is north of India's capital city Delhi. It covers an area of 2,122 sq. km and has a population of 1,450,001 (Census 2011). The district has 4 tehsils (sub-districts), namely Gohana, Ganaur, Sonipat and Kharkhoda. Among these, we selected Sonipat tehsil as the urban sub-site and Kharkhoda as the rural sub-site.

Vizag district is one of the north eastern coastal district in the state of Andhra Pradesh and lies in proximity to the Bay of Bengal. It covers an area of 11,161 sq. km and has a population of 4,290,589 (Census 2011). Vizag district has 43 mandals (sub-districts) comprising 4 urban mandals and 39 rural mandals. Among these, we selected Vizag as the urban sub-site and Makavarapalem and Nathavaram as the rural sub-site.
